# Supplementary material for: Artificial intelligence driven molecule adsorption prediction (AIMAP) applied to chirality recognition of amino acid adsorption on metals
Source: Royal Society of Chemistry journal article supplement (doi:10.1039/d4sc02304h), 2024-01-01
Supplement: d4sc02304h1.pdf [file d4sc02304h1.pdf]

## Supporting information

### Artificial Intelligence Driven Molecule Adsorption Prediction (AIMAP) Applied to Chirality Recognition of Amino Acids Adsorption on Metals

Zi-Xing Guo<sup>1</sup>, Guo-Liang Song<sup>1,\*</sup>, Zhi-Pan Liu<sup>1,2,3\*</sup>

<sup>1</sup>Collaborative Innovation Center of Chemistry for Energy Material, Shanghai Key Laboratory of Molecular Catalysis and Innovative Materials, Key Laboratory of Computational Physical Science, Department of Chemistry, Fudan University, Shanghai 200433, China

<sup>2</sup>Key Laboratory of Synthetic and Self-Assembly Chemistry for Organic Functional Molecules, Shanghai Institute of Organic Chemistry, Chinese Academy of Sciences, Shanghai 200032, China

<sup>3</sup> Shanghai Qi Zhi Institution, Shanghai 200030, China

Corresponding author's email address: \*guoliangsong@fudan.edu.cn; \*zpliu@fudan.edu.cn

#### Table of Contents

|     |                                                                                         |    |
|-----|-----------------------------------------------------------------------------------------|----|
| 1.  | The global neural network (G-NN) potential .....                                        | 2  |
| 1.1 | Overview .....                                                                          | 2  |
| 1.2 | The architecture of G-MBNN .....                                                        | 2  |
| 1.3 | SSW-NN simulation.....                                                                  | 4  |
| 1.4 | SSW method .....                                                                        | 5  |
| 2.  | DFT calculations.....                                                                   | 7  |
| 3.  | Adsorption of methanol, glycine, and aspartate on Cu(211) surface .....                 | 8  |
| 4.  | The Cu-HCNO6 database .....                                                             | 9  |
| 5.  | Benchmark of G-NN potential against DFT calculations.....                               | 11 |
| 6.  | Adsorption of AAs on achiral Cu(111), Cu(100), and Cu(211) surfaces .....               | 12 |
| 6.1 | Adsorption energy .....                                                                 | 12 |
| 6.2 | Adsorption structures of 18 types of AAs on achiral copper surfaces.....                | 15 |
| 7.  | Adsorption of AAs on chiral Cu(3,1,17) <sup>S</sup> surface.....                        | 21 |
| 7.1 | Adsorption energy .....                                                                 | 21 |
| 7.2 | Adsorption structures of 18 types of AAs on chiral Cu(3,1,17) <sup>S</sup> surface..... | 23 |
| 7.3 | Enantiospecific adsorption of Glu and Tyr. ....                                         | 29 |
| 7.4 | Stability of carboxylic-amino skeleton in D/L-Asp .....                                 | 31 |
| 8.  | Dataset Summary of Cu-C-H-O-N quinary G-NN potential .....                              | 32 |

# 1. The global neural network (G-NN) potential

## 1.1 Overview

The global neural network potential (G-NN) is trained and utilized by using LASP software developed by our group<sup>1</sup>. Our G-NN potential is based on the atomic high-dimensional NN architecture<sup>2-4</sup> with the power-type structure descriptor (PTSD)<sup>5</sup> and incorporates further the many-body function corrections to improve the accuracy, the so-called G-MBNN potential architecture<sup>6</sup>. The G-MBNN potential is trained based on 125,658 structures database for the Cu-C-H-O-N system, which is calculated using plane-wave DFT calculations with PBE functional as implemented in the Vienna ab initio simulation package (VASP)<sup>7-9</sup>. The dataset information is detailed in Table S4, which contains a wide set of structure configurations. The model of Cu-C-H-O-N is a four-layer 536-144-144-80-24 feed-forward NN architecture. The first number, 536, describes PTSDs for the first input layer, and the middle numbers describe the neurons in 3 hidden layers, which utilize the hyperbolic tangent activation function. The final output is obtained through 24 many-body functions. The model was trained using the limited-memory Broyden-Fletcher-Goldfarb-Shanno (L-BFGS) optimizers<sup>10</sup>. This potential is openly available from the LASP website ([www.lasphub.com](http://www.lasphub.com)). The final root-mean-square error of the final NN on the whole dataset of the G-NN potential is 5.256 meV / atom.

## 1.2 The architecture of G-MBNN

The architecture of G-MBNN potential is depicted in Figure S1a. In G-MBNN the total energy is expressed as the sum of both atomic energies and many-body functions. As shown in Figure S1b, for each atom in a molecule, a set of PTSD functions<sup>5</sup>  $\{D_i\}$  are calculated from the Cartesian coordinates  $\{R_i\}$ . These functions describe the local chemical environment of each atom and are used as input for the atomic neural networks. To illustrate PTSD, we give the formula of two PTSDs below (also see Ref 6), where the combination of the power function and spherical harmonic function, similar to atomic wavefunctions, provides a convenient way to couple the radial and the angular information of atom.

$$f_c(r_{ij}) = \begin{cases} 0.5 \times \tanh^3 \left[ 1 - \frac{r_{ij}}{r_c} \right], & \text{for } r_{ij} \leq r_c \\ 0 & \text{for } r_{ij} > r_c \end{cases} \quad (\text{S1})$$

$$R^n(r_{ij}) = r_{ij}^n \cdot f_c(r_{ij}) \quad (\text{S2})$$

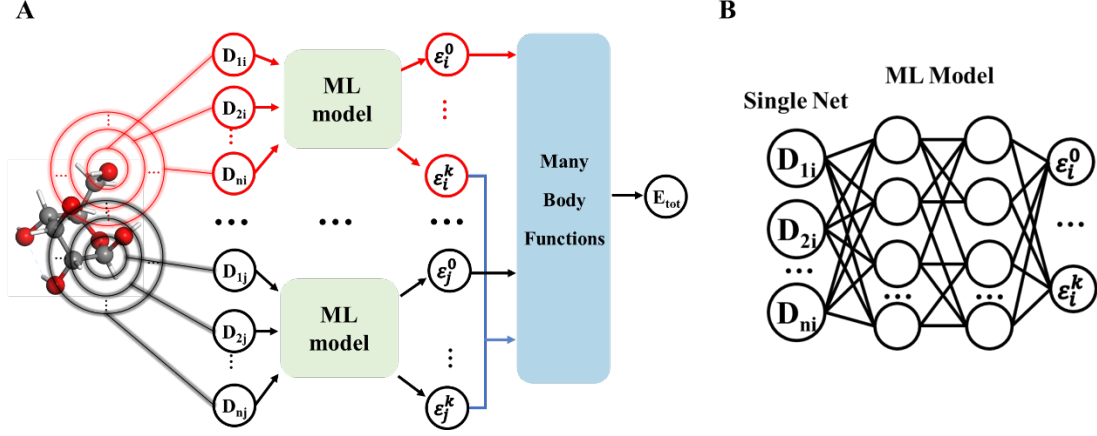

**Figure S1.** Illustration of the architecture of G-MBNN. A) Each atomic ML model (NN utilized in this work) outputs a series of coefficients  $\varepsilon_i^k$ , which act as the parameters for different many-body functions. The total energy of system is written as the sum of many-body functions. B) The implementations of the ML model based on feed-forward NN.

$$S_i^2 = \left[ \sum_{m=-L}^L \left| \sum_{j \neq i} R^n(r_{ij}) Y_{Lm}(\mathbf{r}_{ij}) \right|^2 \right]^{\frac{1}{2}} \quad (\text{S3})$$

$$S_i^5 = \left[ \sum_{m=-L}^L \left| \sum_{j,k \neq i} R^n(r_{ij}) \cdot R^m(r_{ik}) \cdot R^p(r_{jk}) \cdot (Y_{Lm}(\mathbf{r}_{ij}) + Y_{Lm}(\mathbf{r}_{ik})) \right|^2 \right]^{\frac{1}{2}} \quad (\text{S4})$$

In the Eqs,  $r_{ij}$  is the internuclear distance between atom  $i$  and  $j$ ,  $\theta_{ijk}$  is the angle centered at  $i$  atom with  $j$  and  $k$  being neighbors ( $i$ ,  $j$ , and  $k$  are atom indices). The key ingredients in PTSD are the cut-off function  $f_c$  that decays to zero beyond the  $r_c$  (Eq. S1), power-type radial function, trigonometric angular functions, and spherical harmonic function. It should be noted that the terms of the PTSD will increase rapidly as the cutoff  $r_c$  becomes larger.

The feed-forward NN outputs a vector, including the atomic energy contribution  $\varepsilon_i^0$ , a one-body function ( $f_s$ ), and a series of coefficients  $\varepsilon_i^k$  ( $k = 1, 2, \dots$ ) for building different many-body functions, namely  $f_d$ ,  $f_t$  for the two-body and three-body functions, respectively. As shown in Eq. S5, the total energy  $E_{tot}$  of the system can thus be expressed as a sum of the atomic energy contributions ( $f_s$ ) and the many-body functions ( $f_d$ ,  $f_t$ , ...).

$$E = \sum_{s=1}^{ns} \sum_{i=1}^{na} f_s(\varepsilon_i^s) + \sum_{d=1}^{nd} \sum_{i=1}^{na} \sum_{j>i}^{na} f_d(\varepsilon_i^d, \varepsilon_j^d, r_{ij}) + \sum_{t=1}^{nt} \sum_{i=1}^{na} \sum_{j>i}^{na} \sum_{k>j}^{na} \sum_{ang=1}^3 f_t(\varepsilon_i^t, \varepsilon_j^t, \varepsilon_k^t, r_{ij}, r_{ik}, r_{jk}, \theta_{ang}) + \dots \quad (\text{S5})$$

These many-body functions can be written into general function forms shown in Eqs. S6-S9,

where  $\varepsilon_i^k$  from NN acts as the parameters. In these functions,  $r_{ij}$  is the distance between atoms  $i$  and  $j$  and  $\theta_{ijk}$  is the angle centered at the  $i$  atom with neighbors  $j$  and  $k$  ( $i, j$ , and  $k$  are atom indices);  $n_a$  is the total atom number of the system;  $n_s, n_d$  and  $n_c$  are the number of one-body, two-body, three-body function in MBNN architecture respectively ( $s, d$  and  $t$  are function indices);  $\lambda, m_d, m_t$  and  $l_t$  is adjustable parameters of these functions. The  $f_c$  in all the equations is the cutoff function with the cutoff radius ( $r_c$ ) and the adjustable parameter  $\alpha$  and  $\beta$ , as defined in Eq. S9.

$$f_s = \lambda \varepsilon_i^s \quad (S6)$$

$$f_d = \lambda \frac{\varepsilon_i^d \varepsilon_j^d}{r_{ij}^{m_d}} f_c(r_{ij}) \quad (S7)$$

$$f_t = \lambda \frac{\varepsilon_i^t (\varepsilon_j^t + \varepsilon_k^t) (2 + \cos(\theta_{ijk}))^{l_t}}{r_{ij}^{m_t} r_{ik}^{m_t} r_{jk}^{m_t}} f_c(r_{ij}) f_c(r_{ik}) f_c(r_{jk}) \quad (S8)$$

$$f_c(r_{ij}) = 0.5 * \left( 1 - \tanh \left( \alpha (r_{ij} - (r_{cut} - \beta)) \right) \right) \quad (S9)$$

In the G-MBNN architecture, the atomic force is analytically derived based on Eq. S5, where the force component  $F_u$  acting on the atom  $u$  is the derivative of the total energy concerning its coordinate vector  $\mathbf{r}_u$  that is further related to the derivatives to the atomic coefficients  $\varepsilon_i^k$  and the pairwise distance  $r_{iu}$ .

### 1.3 SSW-NN simulation

#### a) SSW-NN method

SSW-NN method is a machine-learning potential based global optimization method, which combines the global neural network (G-NN) potential with SSW method for fast and accurate global PES exploration as implemented in LASP code. While traditional DFT calculations are frustrating for the global optimization of complex systems due to the high computational cost, SSW-NN method provides a general solution for PES scanning with both high efficiency and high accuracy. The G-NN potential is trained based on SSW dataset calculated using DFT and delivers a high speed of PES evaluation, 3~4 orders of magnitude faster than DFT.

#### b) Dataset generation and self-learning NN training

We utilized the stochastic surface walking (SSW) global optimization to generate a fully automated global dataset that does not need a priori knowledge of the system, such as the structural motif, *e.g.*, bonding patterns and symmetry. The final obtained Cu-C-H-O-N global dataset contains a variety of structural patterns on the global PES (125,658 structures, detailed in

Table S4). In brief, the SSW-NN method involves three stages to generate the global dataset, as described below.

(i) **The first stage** generates a raw dataset, which contains the most common atomic environment and serves to build an initial NN PES. This is done by performing density functional theory (DFT) SSW global optimization in a massively parallel way. In this stage, the DFT calculations have low-accuracy setups and small unit cells to speed up the SSW search. By collecting and screening the structures from SSW trajectories, a raw dataset is obtained.

(ii) **The second stage** trains an NN global PES. This is done by refining the dataset using DFT calculations with high-accuracy setups, followed by NN training on the accurate global dataset. The NN architecture applied in this stage utilizes a small set of structural descriptors and a small network size.

(iii) **The third stage** iteratively expands the global dataset. It targets to increase the predictive power of NN PES by incorporating more structural patterns into the dataset. This is done by performing an SSW PES search using the NN PES obtained in the second stage, starting from a variety of initial structures. These initial structures are randomly constructed and include large systems with many atoms per unit cell. The SSW trajectories' structures are collected and filtered to generate an additional dataset. The new dataset is then fed to the global dataset to start a new cycle of NN training (back to the second stage).

#### 1.4 SSW method

The SSW method is an unbiased PES exploration method<sup>11,12</sup>, originating from the bias-potential driven constrained Broyden dimer (BP-CBD) method<sup>13,14</sup> for TS location developed by our group. Each step in SSW simulation contains a climbing procedure and a relaxation procedure to perturb the structure from one minimum to another, where the climbing procedure involves the consecutive Gaussian addition and repeated local relaxation, which is followed by the relaxation procedure to remove all the bias potentials and carry out unconstrained structure optimization. At the end of each SSW step, a structure selection module, *e.g.* using Metropolis Monte-Carlo scheme, is applied to accept/refuse the new minimum. The SSW method makes no attempt to locate the TS explicitly during PES exploration.

In the SSW method (also in BP-CBD), the barrier of the reaction can be surmounted by adding consecutively Gaussian bias potentials. The reaction direction where Gaussians are added is

refined from a randomly generated direction using the biased constrained Broyden dimer method. The randomly generated initial direction  $N_i^0$  ( $i$  labels the index of the SSW step) is thus critical for the efficiency of PES exploration, which is designed to include two components related to the global structure deformation ( $N_i^g$ ) and the local bond formation ( $N_i^l$ ), as shown in Eq. S10 and Eq. S11:

$$N_i^0 = \frac{N_i^g + \lambda N_i^l}{\|N_i^g + \lambda N_i^l\|} \quad (\text{S10})$$

$$N_i^l = \begin{pmatrix} 0 \\ \vdots \\ q_A \\ \vdots \\ q_B \\ \vdots \\ 0 \end{pmatrix} - \begin{pmatrix} 0 \\ \vdots \\ q_B \\ \vdots \\ q_A \\ \vdots \\ 0 \end{pmatrix} \quad (\text{S11})$$

where  $\lambda$  controls the ratio between the global and the local components; and  $q_A$  and  $q_B$  are the coordinates of two randomly selected atoms A and B, respectively, which should NOT be in close contact. Both  $N_i^g$  and  $N_i^l$  are important for PES exploration to prevent the long-time trapping in one particular local minimum, since different reaction channels, including the global structure deformation and the local chemical bond making/breaking, can be involved from one minimum to another.

## 2. DFT calculations

All DFT calculations are performed using the periodic plane wave method as implemented in the VASP package<sup>7-9</sup>. The ionic core electrons are described using the projector augmented wave (PAW) pseudopotential<sup>15</sup>. The electron exchange and correlation effects are described by the GGA-PBE functional<sup>16</sup>. A kinetic energy cutoff is set as 450 eV employed, and the Monkhorst-Pack  $k$ -mesh grid is fully automatically generated with 25 times the reciprocal lattice vectors. Van der Waals interaction is considered using the DFT-D3 method with zero damping<sup>17,18</sup>.

**The calculations on achiral Cu(111), Cu(100), and Cu(211).** In modeling the Cu(111), Cu(100), and Cu(211) surfaces, we utilize supercells containing (4×3×3), (4×4), (4×2) surface units, respectively. The Cu(111) and Cu(100) contain four slabs of copper atoms while the stepped Cu(211) surface is modeled by 12 layers of copper atoms. A 20.00 Å vacuum spacing in the direction orthogonal to the surface is modeled on each surface. The atoms above 6.00 Å, 5.00 Å, and 6.00 Å were allowed to relax on the respective surface. The convergence criteria for electron density and structure optimization in the DFT calculations are established at  $5 \times 10^{-6}$  eV and 0.10 eV Å<sup>-1</sup>, respectively.

**The calculations on chiral Cu(3,1,17)<sup>S</sup> surface.** In modeling the adsorption structures, a (1×2) unit cell is utilized for Gly, Ala, Val, Pro, Leu, Ile, Ser, Thr, Asp, Glu, Asn, and Gln, and a (2×2) unit cell is utilized for Phe, Trp, Tyr, Lys, His, and Arg. The surface is modeled by 27 layers of copper atoms, with a 20.00 Å vacuum spacing in the direction orthogonal to the surface. The atoms above 3.00 Å (the top 12 layers), are allowed to relax on the respective surface. The convergence criteria for structure optimization are established at 0.05 eV Å<sup>-1</sup>. The choice of DFT functional is known to affect the energetics in adsorption and thus change the prediction of enantio-selectivity, especially considering that the energetic discrimination between enantiomers is typically close to the confidence interval of DFT calculations (*e.g.*, around 0.10 eV). As a result, for treating the adsorption on Cu(3,1,17)<sup>S</sup> surface, the BEEF-vdW functional<sup>19,20</sup> (another popular choice for investigating the adsorption structures on copper surfaces) is also utilized.

**The calculations for molecules in the gas phase.** All molecules are optimized in a cell of 15 Å × 15 Å × 15 Å. The convergence criteria for electron density and structure optimization in the DFT calculations are established at  $5 \times 10^{-6}$  eV and 0.10 eV Å<sup>-1</sup>, respectively.

### 3. Adsorption of methanol, glycine, and aspartate on Cu(211) surface

#### Methanol

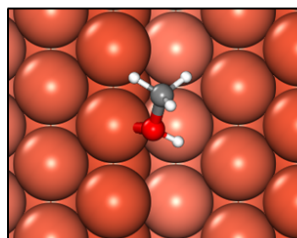

GM

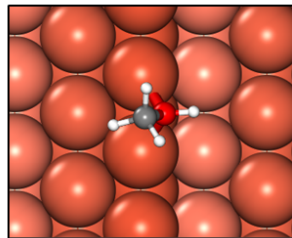

LM-1  
+0.10 eV

#### Glycine

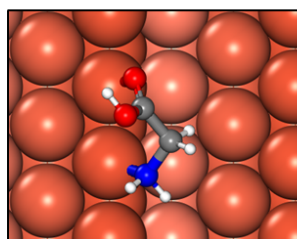

GM

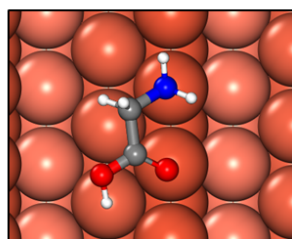

LM-1  
+ 0.13 eV

#### Aspartate

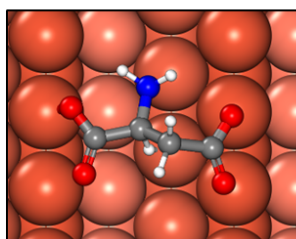

GM

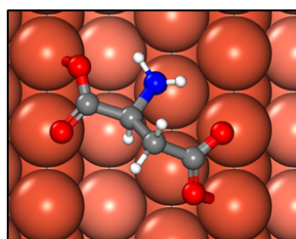

LM-1  
+ 0.07 eV

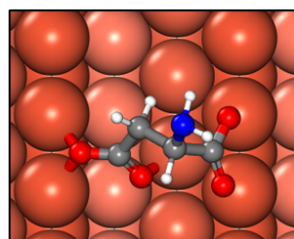

LM-2  
+ 0.20 eV

Figure S2. Representative adsorption structures for methanol, glycine, aspartate on Cu(211) surface. These adsorption structures and relative stability (using GM as reference) are predicted by AIMAP. The parameter settings are list in Table 1.



#### 4. The Cu-HCNO6 database

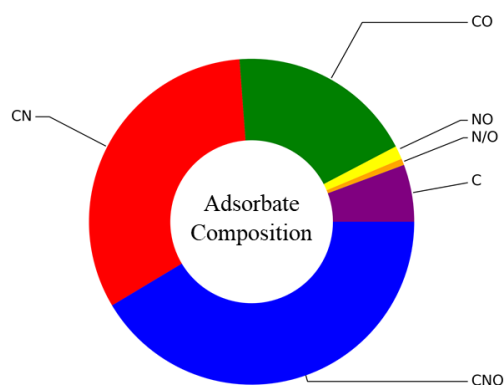

**Figure S3 Element composition of the adsorbates in Cu-HCNO6 database.** The pie chart illustrates the element composition of 9592 molecules within the Cu-HCNO6 database. Each segment represents molecules with specific element compositions (excluding hydrogen), with the size indicating their proportion in the database. Six distinct compositions are considered: carbon only (C, purple), nitrogen or oxygen only (N/O, orange), both nitrogen and oxygen (NO, yellow), both carbon and oxygen (CO, green), both carbon and nitrogen (CN, red), and lastly, all three elements (CNO).

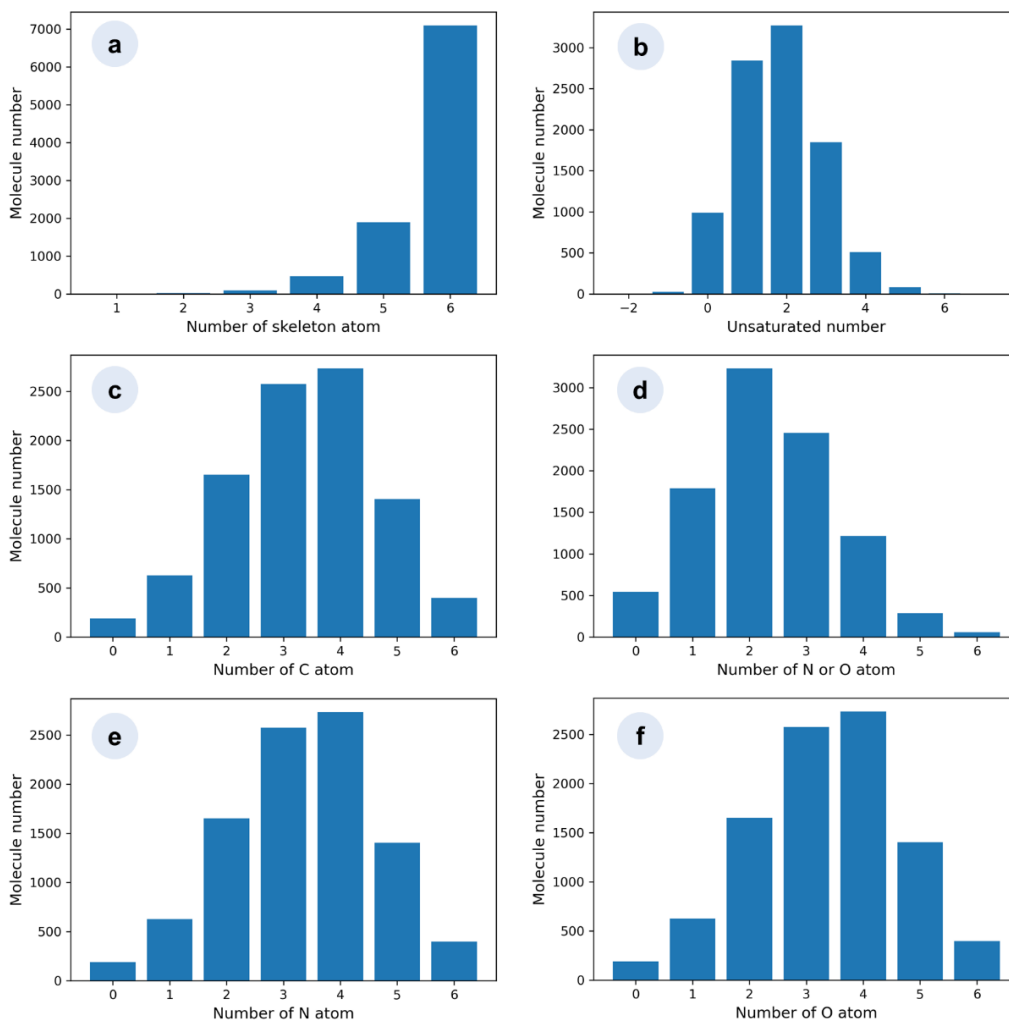

**Figure S4 Molecule compositions in the Cu-HCNO6 database.** These histograms depict the distribution of molecules with specific compositions from the Cu-HCNO6 database. The number of molecules is categorized by **(a)** The number of skeleton atoms (C, N, and O); **(b)** The value of the unsaturated number (calculated by:  $(2 \times n(C) + n(N) - n(H))/2 - 2$ ,  $n(C), n(N), n(H)$  represent the number of respective elements) **(c)** The number of carbon atoms; **(d)** The number of nitrogen or oxygen atoms; **(e)** The number of nitrogen atoms; **(f)** The number of oxygen atom.

## 5. Benchmark of G-NN potential against DFT calculations

**Table S1 Benchmark of G-NN functional against DFT calculations.** Listed data include the type of dataset for benchmark, the number of adsorption structures in respective dataset ( $N_{struc}$ ), and the root-mean-square-error in energy ( $E$ , in unit eV and meV / atom ) and force ( $F$ , in unit eV / Å).

| Benchmark Dataset <sup>a</sup> | $N_{struc}$ | $E$  |            | $F$    |
|--------------------------------|-------------|------|------------|--------|
|                                |             | eV   | meV / atom | eV / Å |
| Train <sup>b</sup>             | 10,000      | 0.14 | 2.287      | 0.082  |
| Test                           | 10,000      | 0.19 | 3.468      | 0.124  |

- Randomly selected from the Cu-HCNO6 database.
- Included in the self-learning training loop of the G-NN potential.

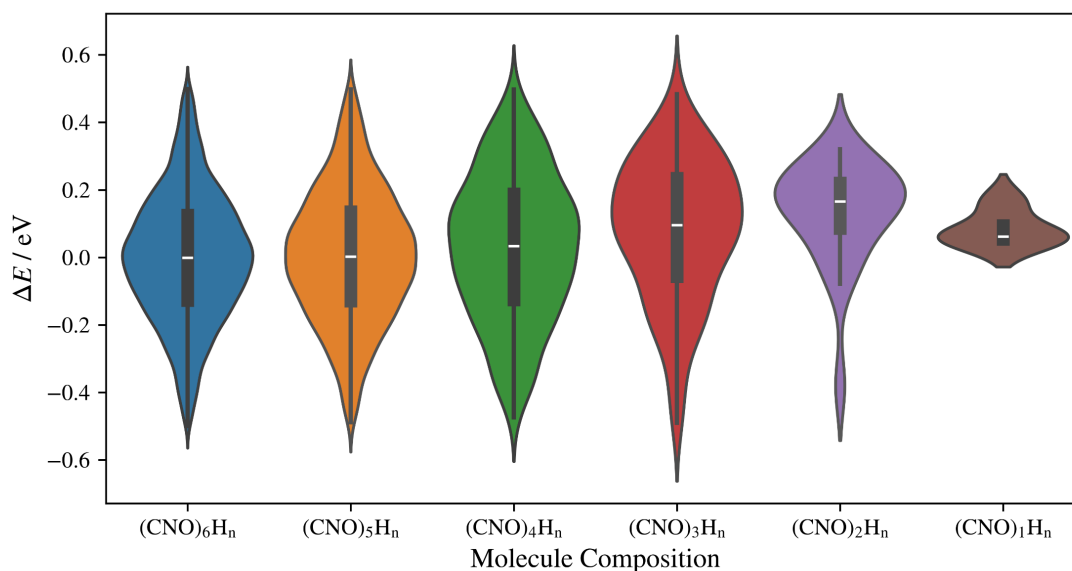

**Figure S5 The performance of G-NN potential in predicting adsorption energy.** This diagram illustrates the predictive performance of the G-NN potential for adsorption energy. The violins summarize the G-NN potential's predictions of adsorption energy ( $E_{ads}$ ) for molecules in the 10000-sized test dataset. The x-axis denotes the composition of adsorbed molecules, labeled as (CNO)<sub>m</sub>H<sub>n</sub>. The value in y-axis,  $\Delta E$ , is computed by  $E_{NN} - E_{DFT}$ , in which the  $E_{NN}$  and  $E_{DFT}$  represents the adsorption energy obtained by G-NN potential and DFT calculations, respectively.

## 6. Adsorption of AAs on achiral Cu(111), Cu(100), and Cu(211) surfaces

### 6.1 Adsorption energy

**Table S2** The adsorption free energy ( $G_{ads}$ ) of all AA species on achiral Cu(111), Cu(100), and Cu(211) surface. Listed data include the molecule name, the deprotonation number of specific species <sup>a</sup>, the adsorption free energy ( $G_{ads}$ , calculated by Eq. 1), the relative stability of D/L-enantiomers. The values obtained by PBE-D3 and PBE are separately listed in the table.

| Molecule Name | Deprotonation Number | $G_{ads}/$ eV |       |         |       |         |       |
|---------------|----------------------|---------------|-------|---------|-------|---------|-------|
|               |                      | Cu(111)       |       | Cu(100) |       | Cu(211) |       |
|               |                      | PBE-D3        | PBE   | PBE-D3  | PBE   | PBE-D3  | PBE   |
| Ala           | 1                    | -1.62         | -0.62 | -2.03   | -1.16 | -2.20   | -1.18 |
|               | 0                    | -1.14         | -0.28 | -1.21   | -0.44 | -1.45   | -0.33 |
| Arg           | 1                    | -2.25         | -0.28 | -2.90   | -1.32 | -3.17   | -2.04 |
|               | 0                    | -2.08         | -0.32 | -1.98   | -0.06 | -2.30   | -1.30 |
| Asn           | 1                    | -1.85         | -0.49 | -2.34   | -1.15 | -2.49   | -1.35 |
|               | 0                    | -1.58         | -0.34 | -1.36   | -0.28 | -1.81   | 0.17  |
| Asp           | 2                    | -2.30         | -1.15 | -2.86   | -1.85 | -3.11   | -1.72 |
|               | 1 <sup>b</sup>       | -1.89         | -0.99 | -2.26   | -1.13 | -2.58   | -1.05 |
|               | 1 <sup>c</sup>       | -1.86         | -0.77 | -2.22   | -1.12 | -2.76   | -0.69 |
|               | 0                    | -1.26         | -0.29 | -1.35   | -0.34 | -1.67   | 0.18  |
| Glu           | 2                    | -2.59         | -1.22 | -3.17   | -2.04 | -3.65   | -2.45 |
|               | 1 <sup>b</sup>       | -2.07         | -0.74 | -2.44   | -1.16 | -3.07   | -2.00 |
|               | 1 <sup>c</sup>       | -1.99         | -0.69 | -2.43   | -1.28 | -2.75   | -0.60 |
|               | 0                    | -1.46         | -0.03 | -1.46   | 0.01  | -1.84   | 0.37  |
| Gln           | 1                    | -2.36         | -0.87 | -2.89   | -1.56 | -3.08   | -1.87 |
|               | 0                    | -2.05         | -0.64 | -1.95   | -0.61 | -2.23   | -0.69 |
| Gly           | 1                    | -1.49         | -0.65 | -1.88   | -1.19 | -2.06   | -1.24 |
|               | 0                    | -1.03         | -0.18 | -1.11   | -0.42 | -1.32   | -0.51 |
| His           | 1                    | -2.26         | -0.69 | -2.84   | -1.71 | -3.20   | -2.17 |
|               | 0                    | -1.71         | -0.27 | -2.03   | -0.65 | -2.00   | -0.74 |
| Ile           | 1                    | -1.89         | -0.52 | -2.29   | -1.12 | -2.35   | -0.62 |
|               | 0                    | -1.42         | -0.13 | -1.47   | -0.33 | -1.61   | -0.38 |

|     |                |       |       |       |       |       |       |
|-----|----------------|-------|-------|-------|-------|-------|-------|
| Leu | <b>1</b>       | -1.83 | -0.48 | -2.26 | -1.15 | -2.35 | -1.19 |
|     | 0              | -1.42 | -0.19 | -1.39 | -0.35 | -1.59 | -0.39 |
| Lys | <b>1</b>       | -2.63 | -0.79 | -3.39 | -1.70 | -3.36 | -2.17 |
|     | 0              | -2.21 | -0.54 | -2.20 | -0.46 | -2.46 | -1.32 |
| Phe | <b>1</b>       | -2.13 | -0.63 | -2.54 | -1.28 | -2.74 | -1.78 |
|     | 0              | -1.81 | 0.00  | -1.74 | -0.47 | -2.26 | -1.43 |
| Pro | <b>1</b>       | -1.73 | -0.56 | -2.06 | -1.10 | -2.23 | -0.87 |
|     | 0              | -1.25 | -0.15 | -1.38 | -0.34 | -1.68 | -0.55 |
| Ser | <b>2</b>       | -2.18 | -1.15 | -2.54 | -1.66 | -2.68 | -1.44 |
|     | 1 <sup>b</sup> | -1.69 | -0.56 | -2.10 | -1.19 | -2.35 | -1.51 |
|     | 0              | -1.26 | -0.18 | -1.27 | -0.42 | -1.61 | -0.09 |
| The | <b>2</b>       | -2.32 | -1.14 | -2.67 | -1.69 | -2.77 | -1.27 |
|     | 1 <sup>b</sup> | -1.80 | -0.62 | -2.24 | -1.22 | -2.50 | -1.30 |
|     | 0              | -1.35 | -0.32 | -1.47 | -0.39 | -1.64 | -0.10 |
| Trp | <b>1</b>       | -2.49 | -0.42 | -2.72 | -1.04 | -3.20 | -1.40 |
|     | 0              | -2.25 | -0.26 | -2.52 | -0.51 | -2.40 | -1.33 |
| Tyr | <b>2</b>       | -2.48 | -0.61 | -3.33 | -1.79 | -3.56 | -2.25 |
|     | 1 <sup>b</sup> | -2.17 | -0.46 | -2.83 | -1.17 | -3.13 | -1.17 |
|     | 0              | -1.89 | -0.27 | -2.10 | -0.25 | -2.43 | -0.89 |
| Val | <b>1</b>       | -1.70 | -0.53 | -2.29 | -1.25 | -2.29 | -1.46 |
|     | 0              | -1.37 | -0.27 | -1.48 | -0.39 | -1.56 | -0.65 |

a. Deprotonation state in bold is the most favorable.

b. Deprotonation in the  $\alpha$ -carboxyl group.

c. Deprotonation in the side chain carboxyl group.

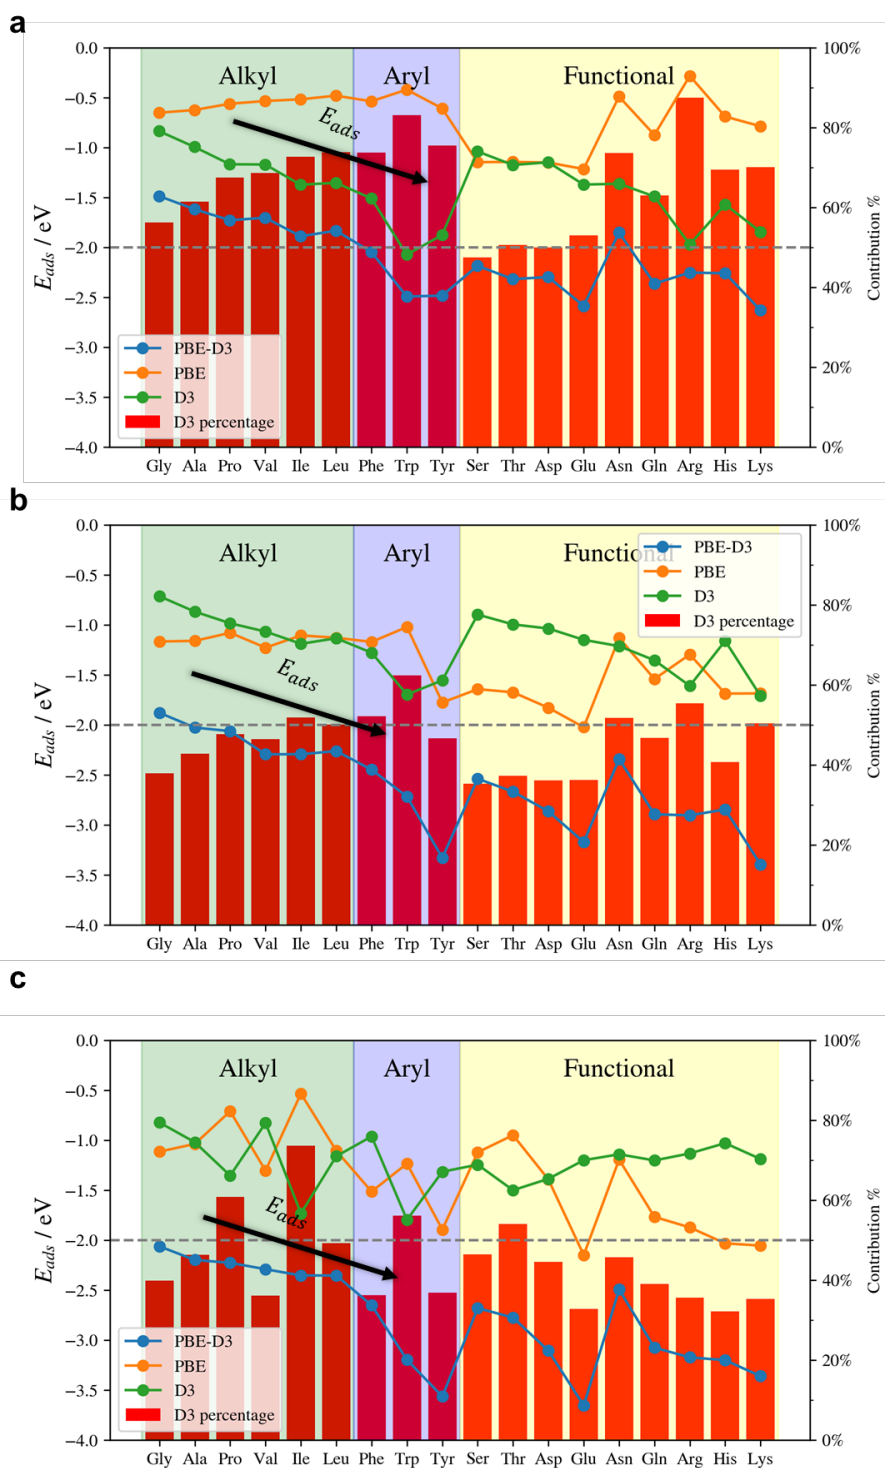

**Figure S6 Adsorption energy of 18 types of AAs on Cu(111), Cu(100), and Cu(211) surfaces.** The three sub-figures depict the adsorption energy decomposition for (a) Cu(111), (b) Cu(100), and (c) Cu(211) surfaces. The calculated adsorption energy using PBE-D3 is represented by blue dots, while its decomposition into contributions from PBE and D3 dispersion correlation is shown by yellow dots (PBE) and green dots with red bars (D3). A black arrow highlights the increasing of adsorption energy with side chain volume for amino acids with alkyl side chains.

## 6.2 Adsorption structures of 18 types of AAs on achiral copper surfaces.

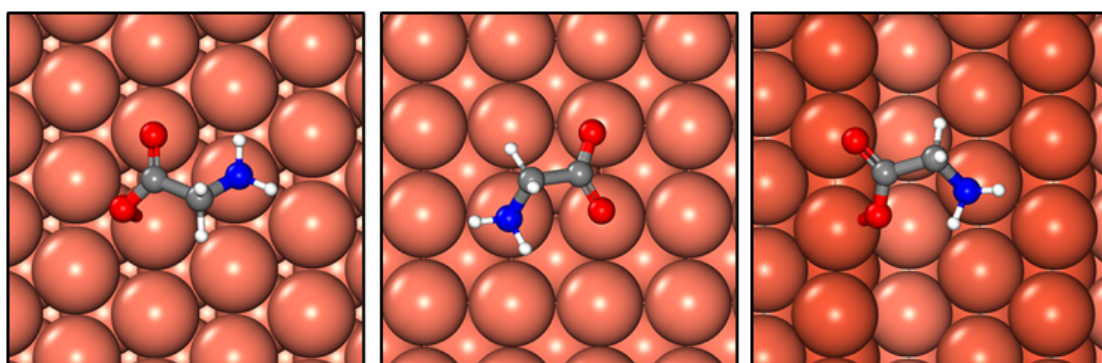

**Gly-(111)**

**Gly-(100)**

**Gly-(211)**

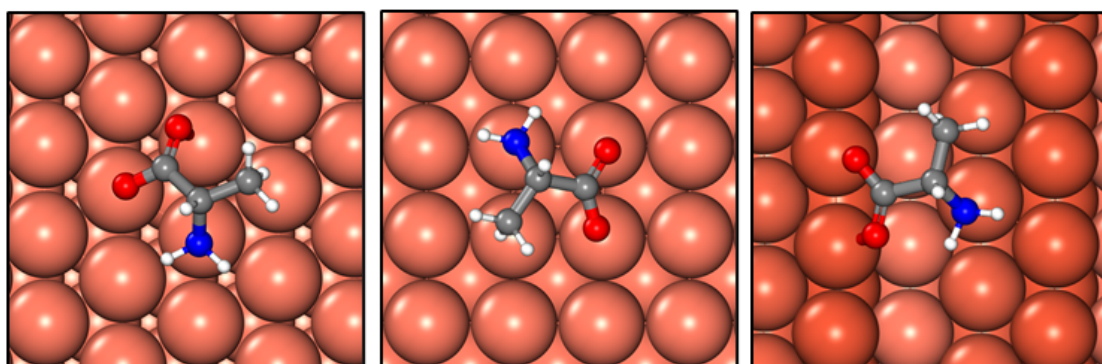

**Ala-(111)**

**Ala-(100)**

**Ala-(211)**

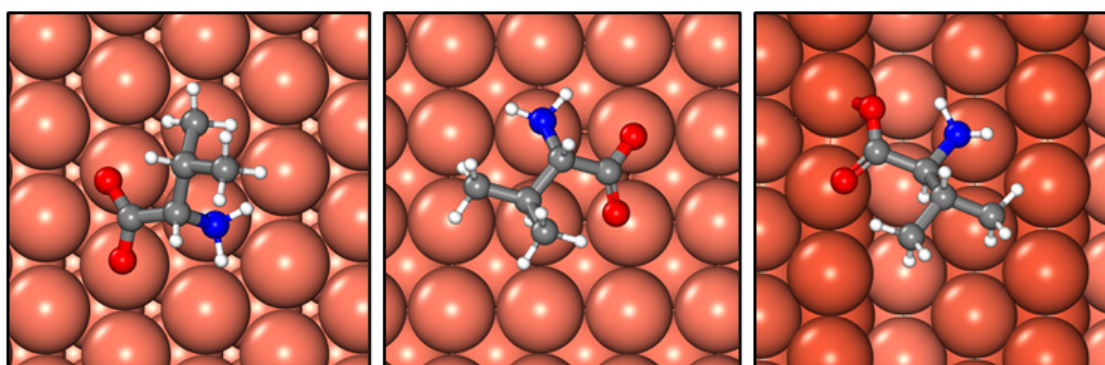

**Val-(111)**

**Val-(100)**

**Val-(211)**

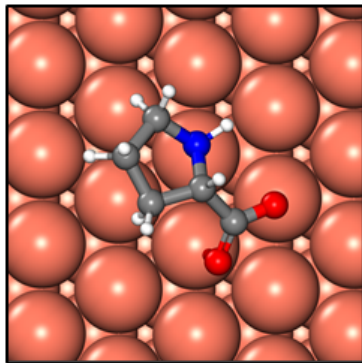

**Pro-(111)**

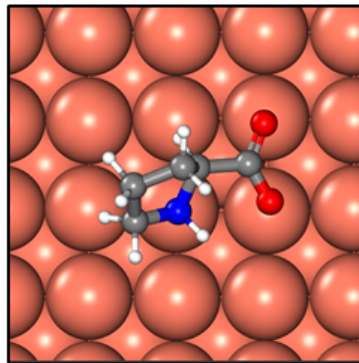

**Pro-(100)**

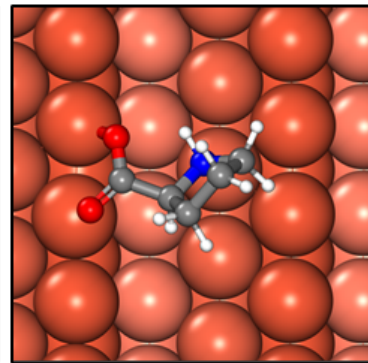

**Pro-(211)**

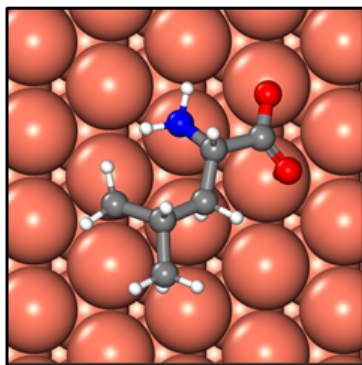

**Leu-(111)**

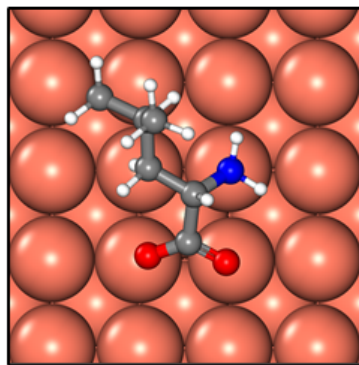

**Leu-(100)**

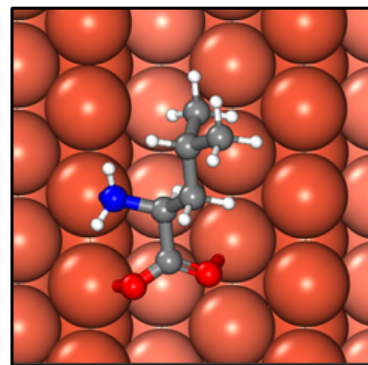

**Leu-(211)**

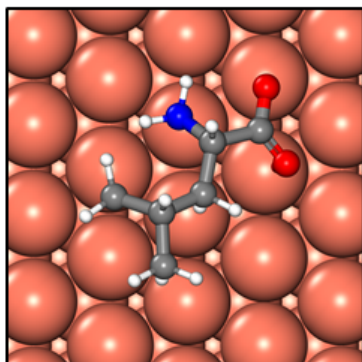

**Ile-(111)**

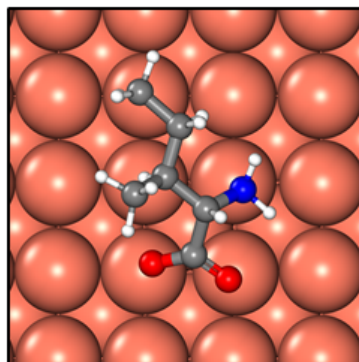

**Ile-(100)**

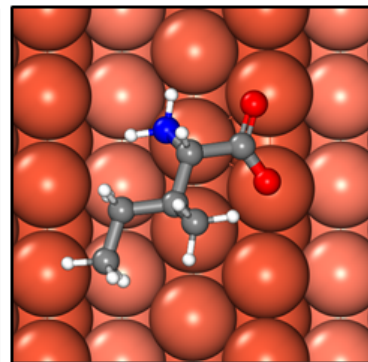

**Ile-(211)**



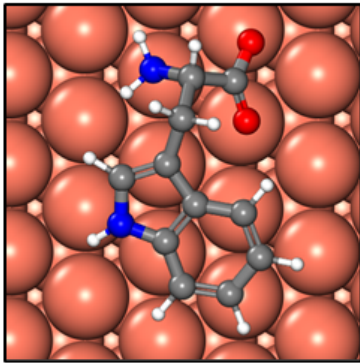

**Trp-(111)**

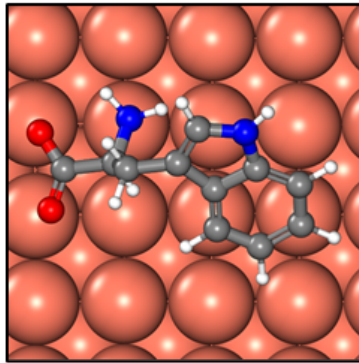

**Trp-(100)**

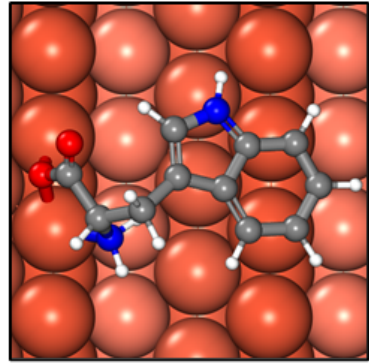

**Trp-(211)**

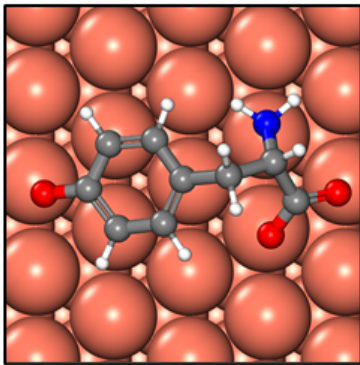

**Tyr-(111)**

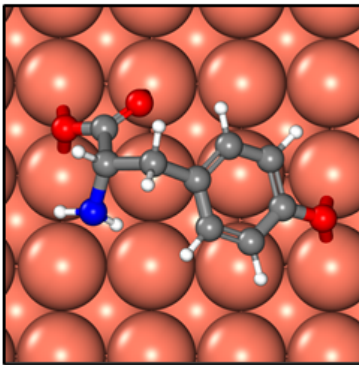

**Tyr-(100)**

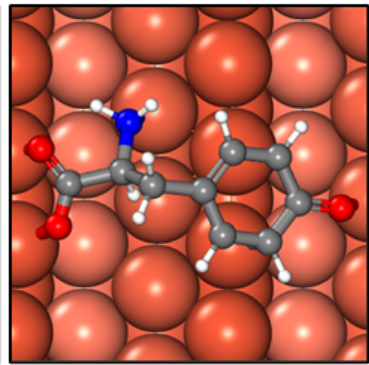

**Tyr-(211)**

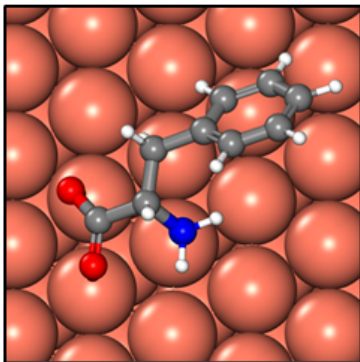

**Phe-(111)**

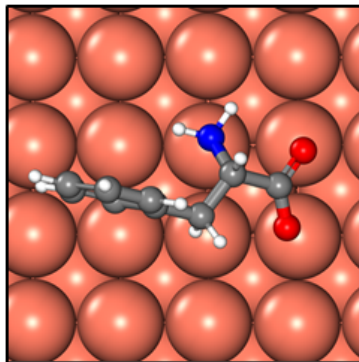

**Phe-(100)**

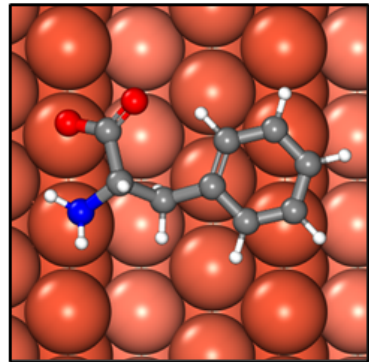

**Phe-(211)**

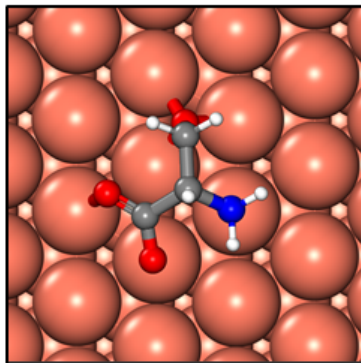

**Ser-(111)**

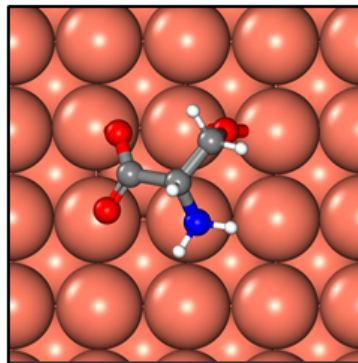

**Ser-(100)**

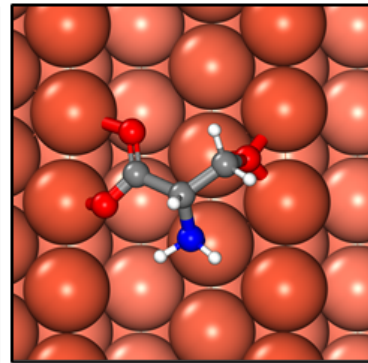

**Ser-(211)**

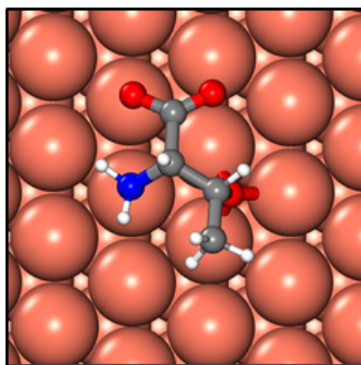

**Thr-(111)**

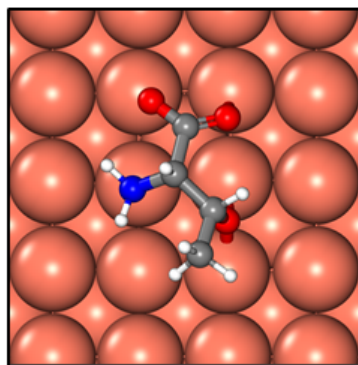

**Thr-(100)**

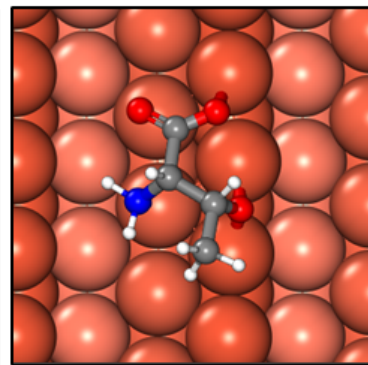

**Thr-(211)**

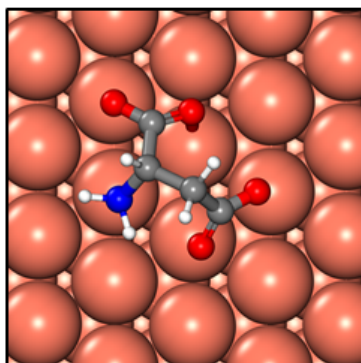

**Asp-(111)**

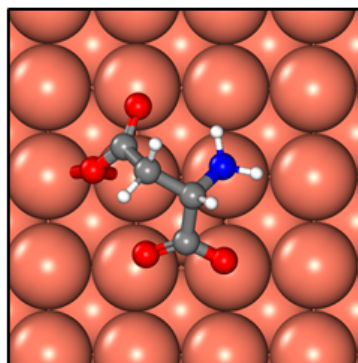

**Asp-(100)**

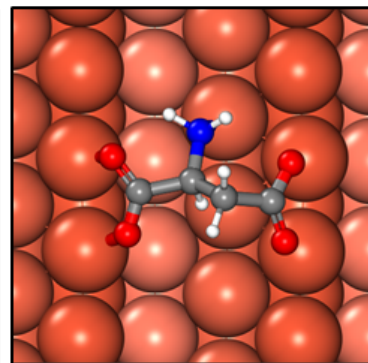

**Asp-(211)**

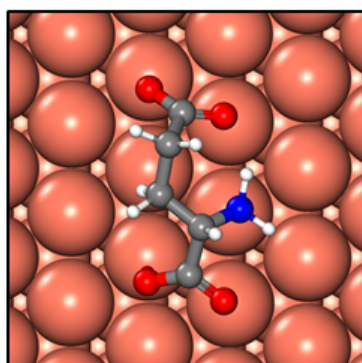

**Glu-(111)**

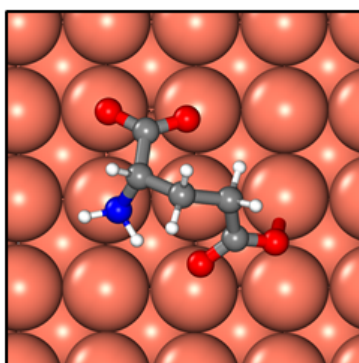

**Glu-(100)**

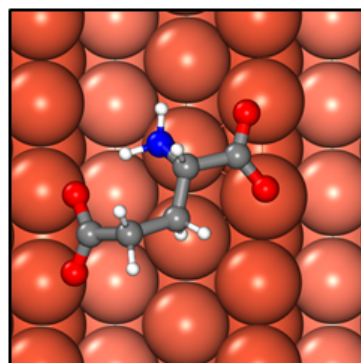

**Glu-(211)**

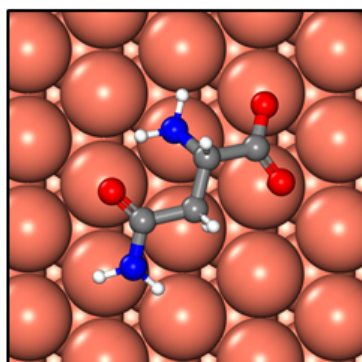

**Asn-(111)**

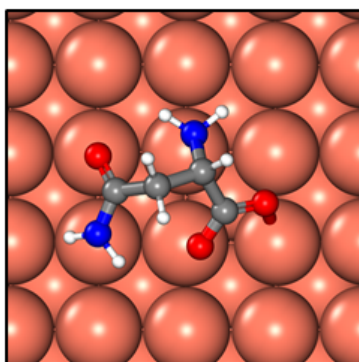

**Asn-(100)**

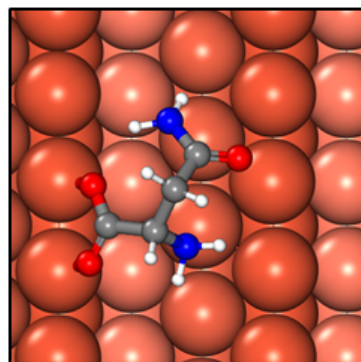

**Asn-(211)**

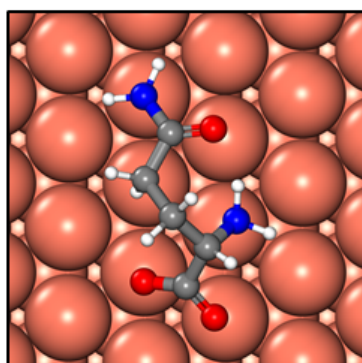

**Gln-(111)**

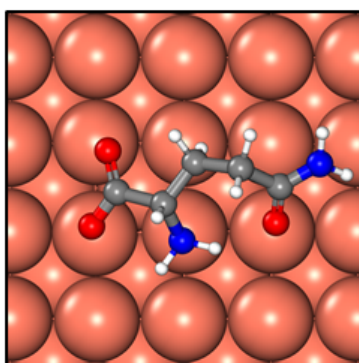

**Gln-(100)**

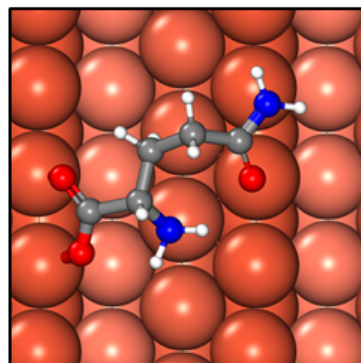

**Gln-(211)**

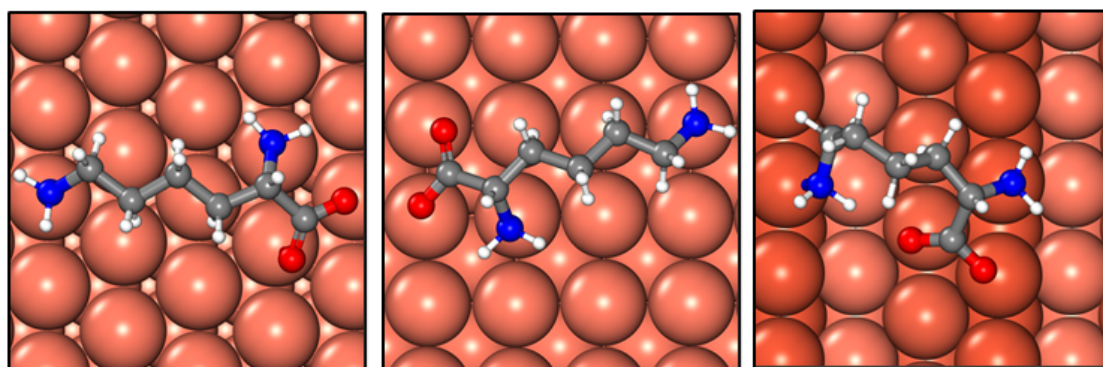

**Lys-(111)**

**Lys-(100)**

**Lys-(211)**

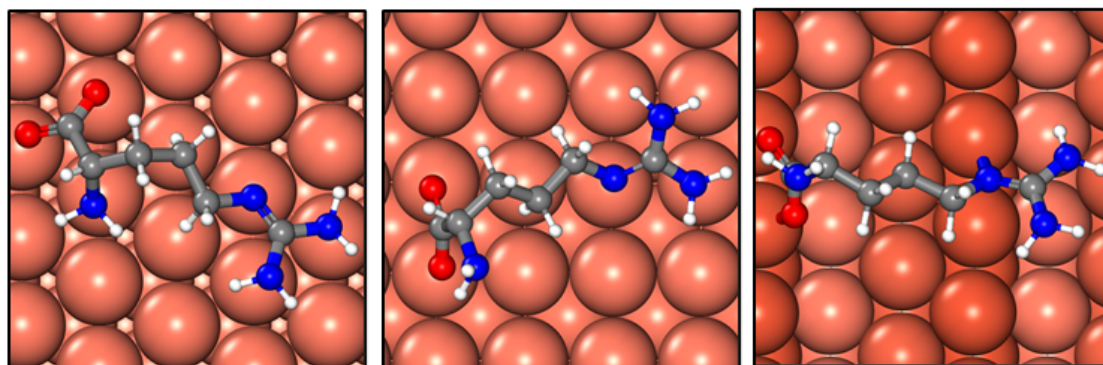

**Arg-(111)**

**Arg-(100)**

**Arg-(211)**

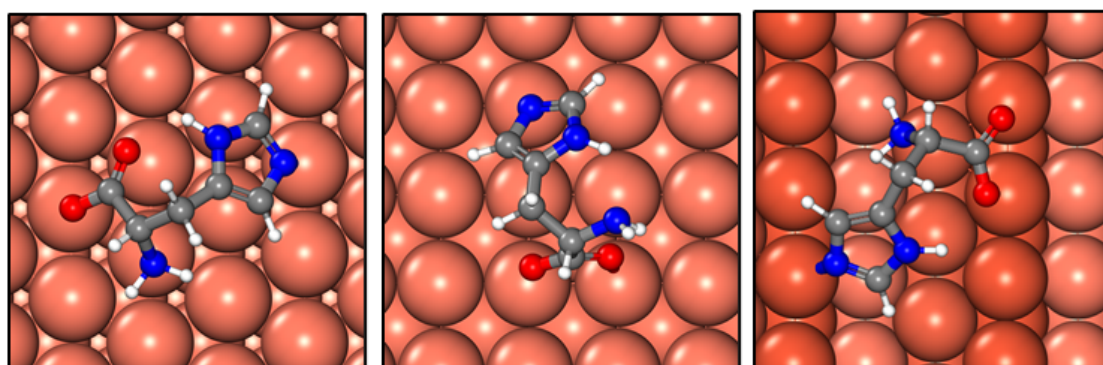

**His-(111)**

**His-(100)**

**His-(211)**

**Figure S7** Adsorption structures of 18 types of AAs on achiral Cu(111), Cu(100), and Cu(211) surfaces.

## 7. Adsorption of AAs on chiral Cu(3,1,17)<sup>S</sup> surface

### 7.1 Adsorption energy

**Table S3. Adsorption energy of AAs on chiral Cu(3,1,17)<sup>S</sup> surfaces.** Listed data include the molecule name<sup>a</sup>, the adsorption energy ( $G_{ads}$  computed using Eq. 1 but without ZPE correction;  $\mu_{H_2}(T, p)$  is calculated by Eq. 2)<sup>b</sup>, the relative stability of D/L-enantiomers. The values obtained by PBE-D3 and BEEF-vdW are separately listed in the table.

| Molecule<br>Name | PBE-D3              |       |                            | BEEF-vdW            |       |                            |
|------------------|---------------------|-------|----------------------------|---------------------|-------|----------------------------|
|                  | $G_{ads}/\text{eV}$ |       | $\Delta E_{L/D}/\text{eV}$ | $G_{ads}/\text{eV}$ |       | $\Delta E_{L/D}/\text{eV}$ |
|                  | L                   | D     |                            | L                   | D     |                            |
| <b>Ala</b>       | -2.30               | -2.33 | +0.03                      | -1.89               | -1.91 | +0.03                      |
| <b>Val</b>       | -2.60               | -2.60 | +0.01                      | -2.04               | -2.10 | +0.06                      |
| <b>Pro</b>       | -2.40               | -2.52 | +0.11                      | -1.92               | -1.99 | +0.07                      |
| <b>Leu</b>       | -2.67               | -2.67 | +0.00                      | -2.07               | -2.13 | +0.06                      |
| <b>Ile</b>       | -2.63               | -2.68 | +0.05                      | -2.07               | -2.12 | +0.05                      |
| <b>Tyr</b>       | -3.66               | -3.85 | +0.19                      | -2.64               | -2.84 | +0.20                      |
| <b>Trp</b>       | -3.48               | -3.51 | +0.04                      | -2.27               | -2.33 | +0.06                      |
| <b>Ser</b>       | -2.69               | -2.54 | -0.14                      | -2.21               | -2.16 | -0.05                      |
| <b>Gln</b>       | -3.24               | -3.31 | +0.07                      | -2.31               | -2.51 | +0.20                      |
| <b>Glu</b>       | -3.48               | -3.64 | +0.16                      | -2.95               | -3.09 | +0.14                      |
| <b>Asp</b>       | -3.16               | -3.29 | +0.13                      | -2.79               | -2.90 | +0.11                      |
| <b>Arg</b>       | -3.88               | -4.00 | +0.11                      | -2.70               | -2.75 | +0.05                      |
| <b>His</b>       | -3.50               | -3.31 | -0.19                      | -2.43               | -2.31 | -0.12                      |
| Gly              | -2.11               |       |                            | -1.62               |       |                            |
| The              | -2.74               | -2.63 | -0.11                      | -2.19               | -2.19 | +0.00                      |
| Asn              | -2.74               | -2.62 | -0.12                      | -1.88               | -1.98 | +0.10                      |
| Lys              | -3.60               | -3.61 | +0.01                      | -2.56               | -2.47 | -0.10                      |
| Phe              | -2.98               | -2.93 | -0.06                      | -2.17               | -2.26 | +0.09                      |

- The bold molecules have the same enantiomer preference under both functionals.
- All the species are in their highest deprotonation level.

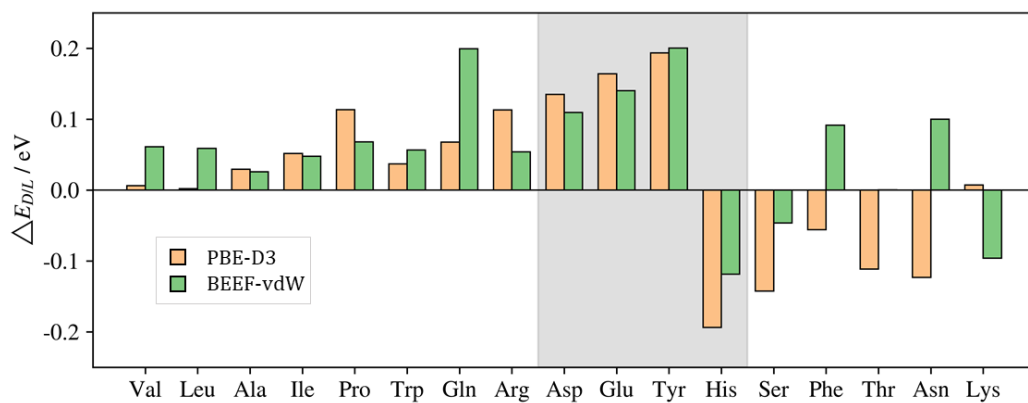

**Figure S8 Energetic discrimination ( $\Delta E_{D/L}$ , defined by Eq. 3) of 17 types of chiral AAs on  $\text{Cu}(3,1,17)^{\text{S}}$  surface.** The green and orange bars represent the  $\Delta E_{(L/D)}$  obtained by PBE-D3 and BEEF-vdW methods, respectively. The four types of AAs exhibiting consistent strong discrimination ( $|\Delta E_{D/L}| > 0.10$  eV) under both functionals are highlighted with grey shadow.

7.2 Adsorption structures of 18 types of AAs on chiral Cu(3,1,17)<sup>S</sup> surface.

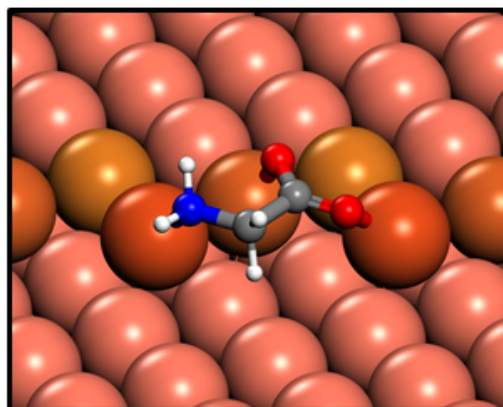

Gly

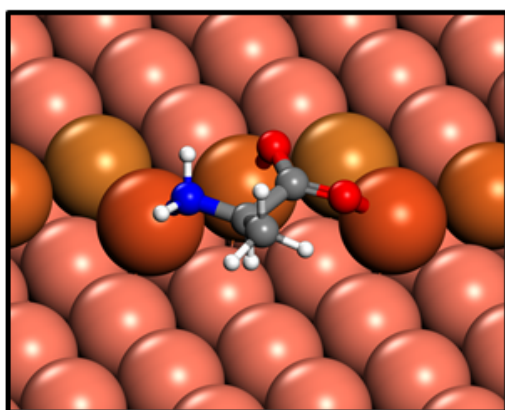

D-Ala

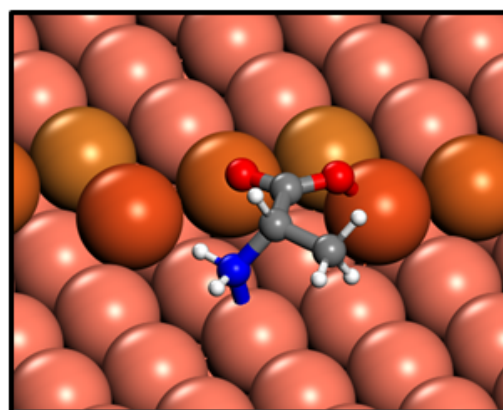

L-Ala

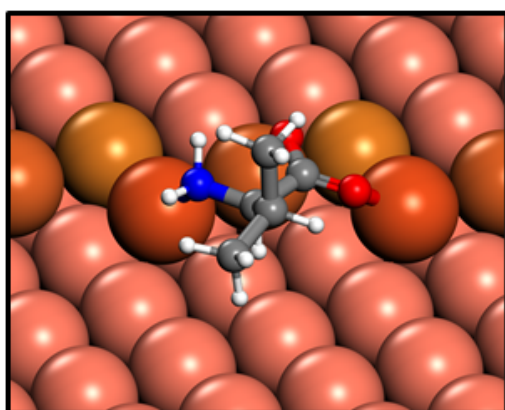

D-Val

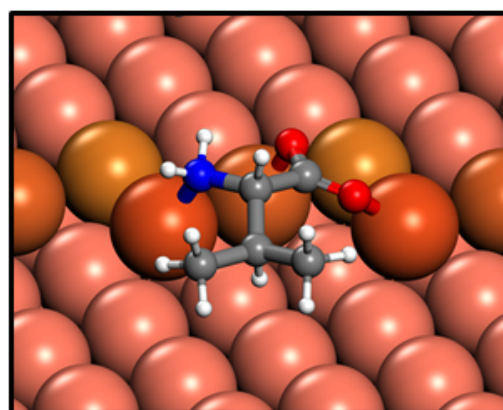

L-Val

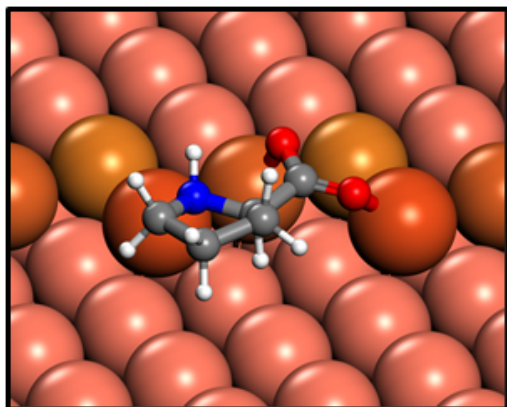

D-Pro

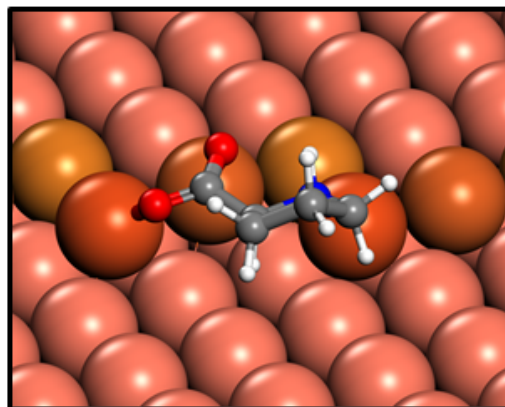

L-Pro

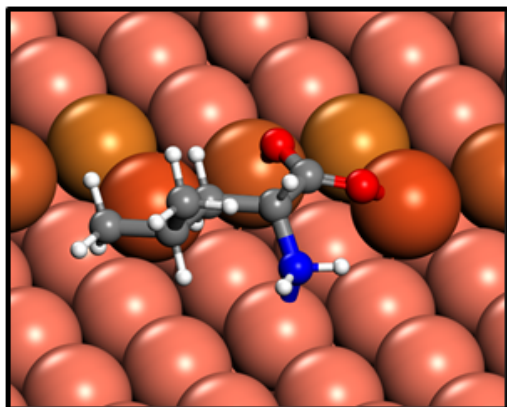

D-Leu

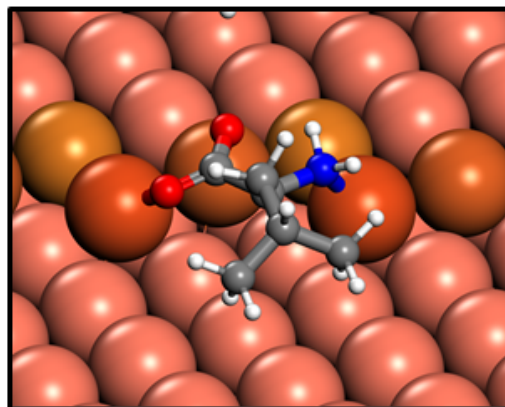

L-Leu

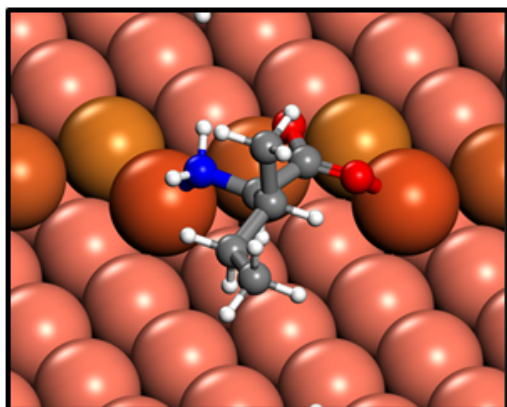

D-Ile

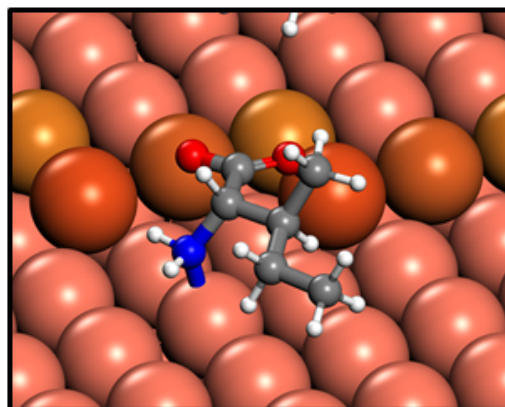

L-Ile



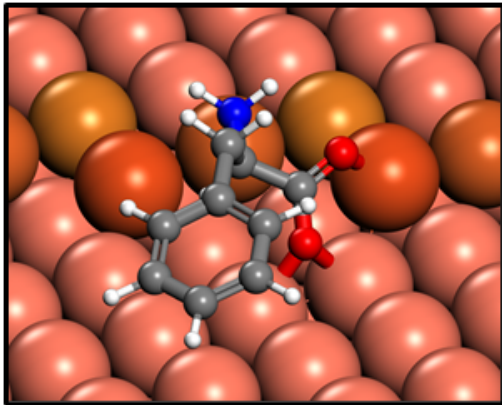

D-Phe

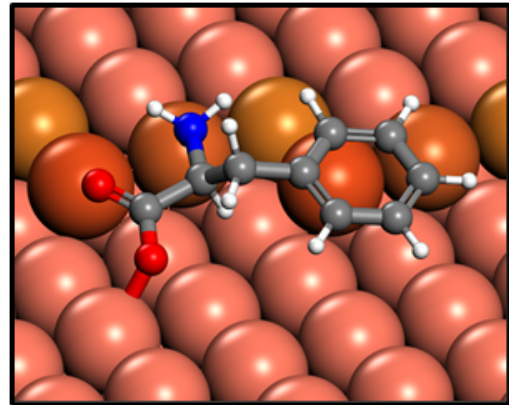

L-Phe

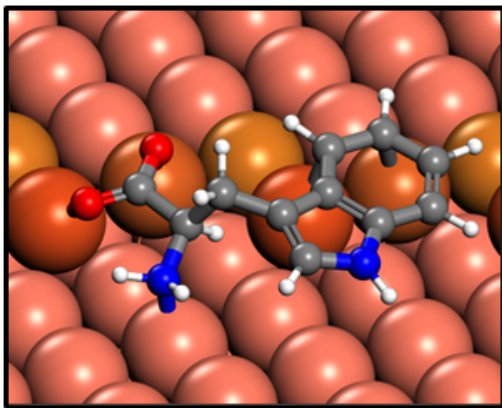

D-Trp

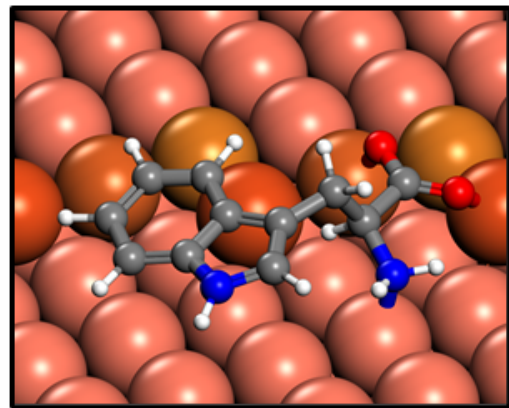

L-Trp

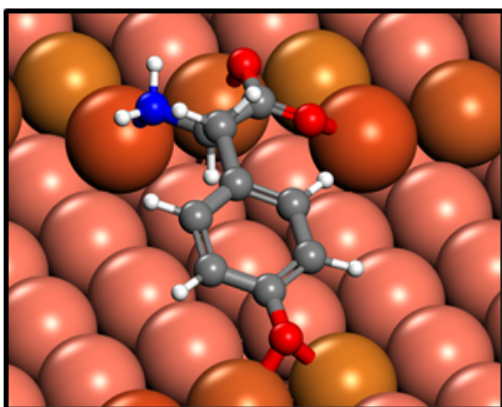

D-Tyr

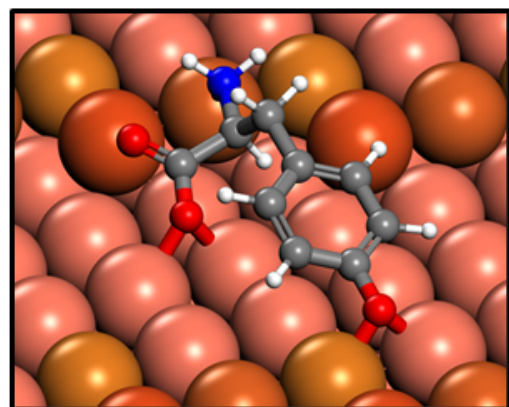

L-Tyr

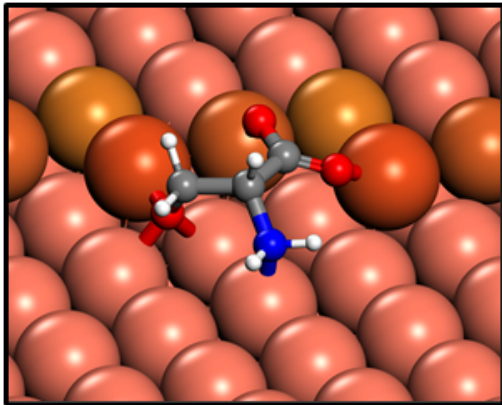

D-Ser

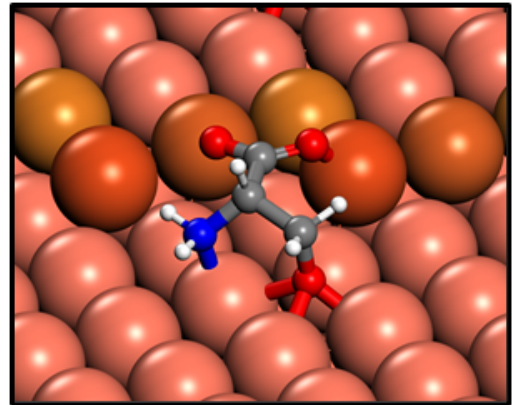

L-Ser

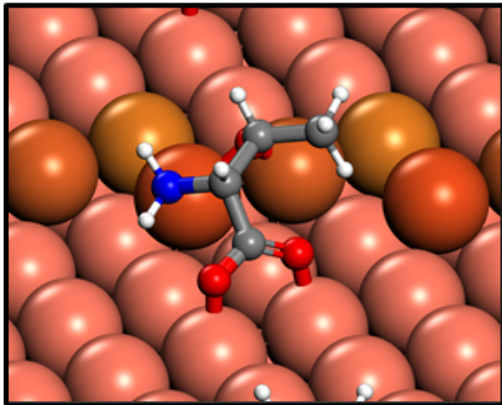

D-Thr

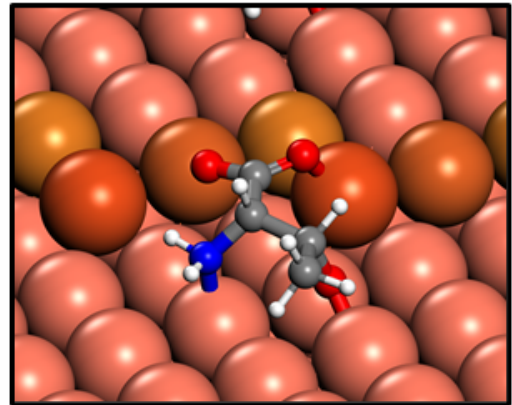

D-Thr

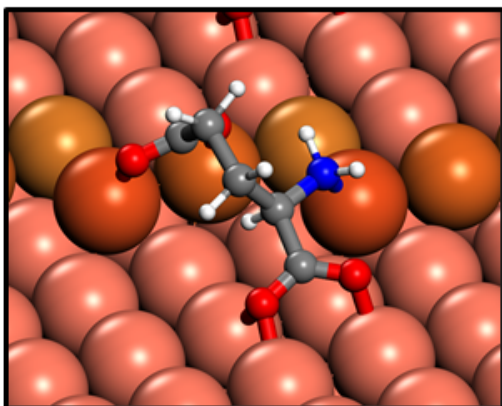

D-Glu

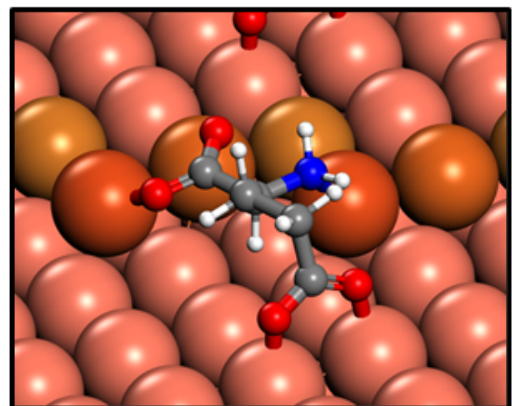

L-Glu

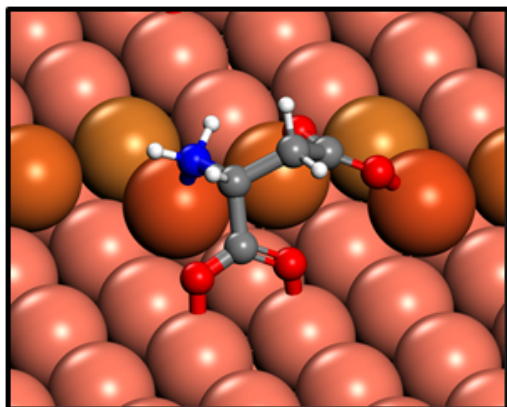

D-Asp

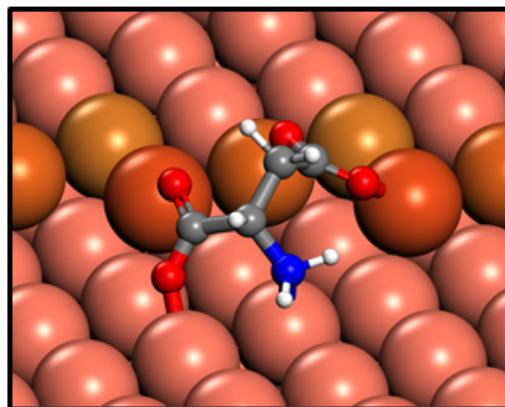

L-Asp

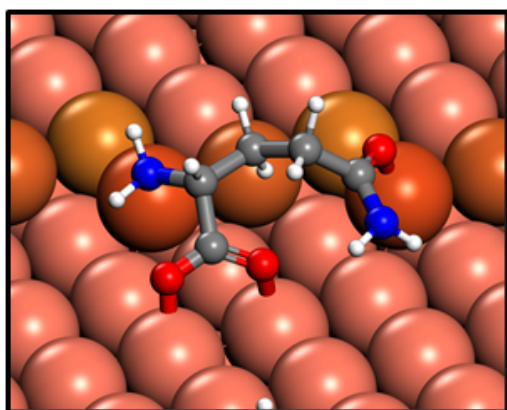

D-Gln

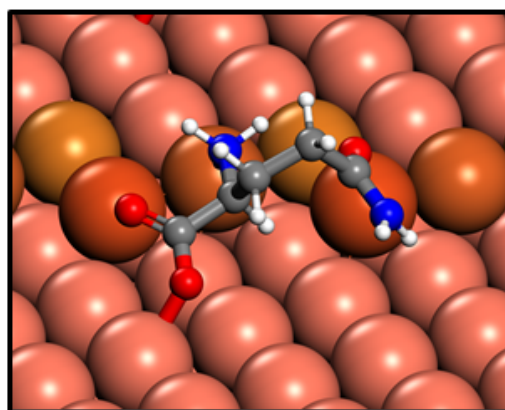

L-Gln

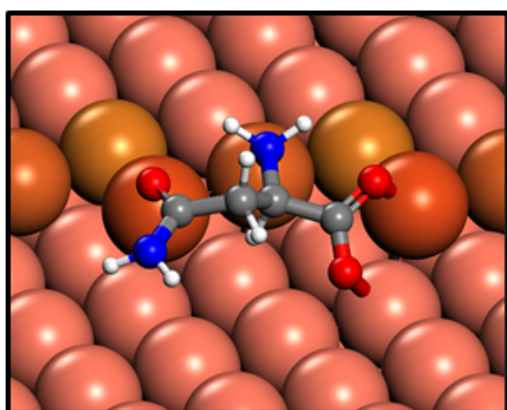

D-Asn

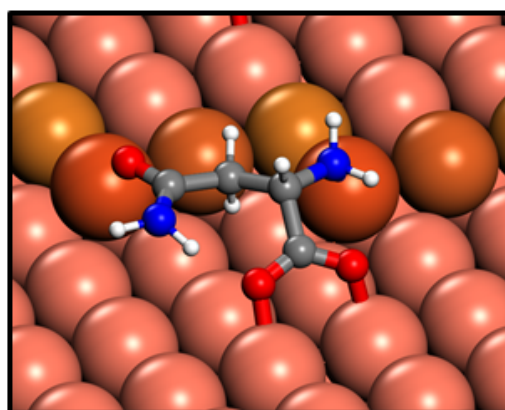

L-Asn

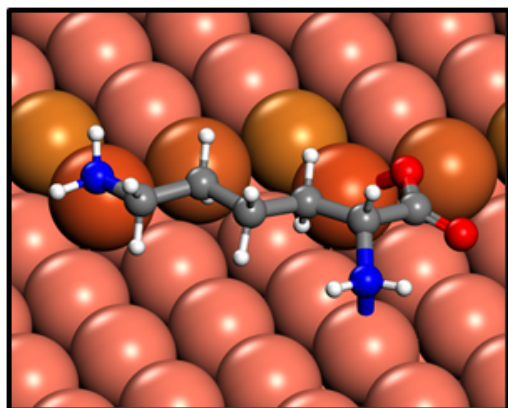

D-Lys

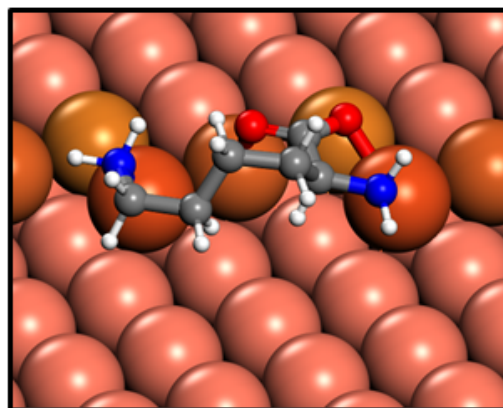

L-Lys

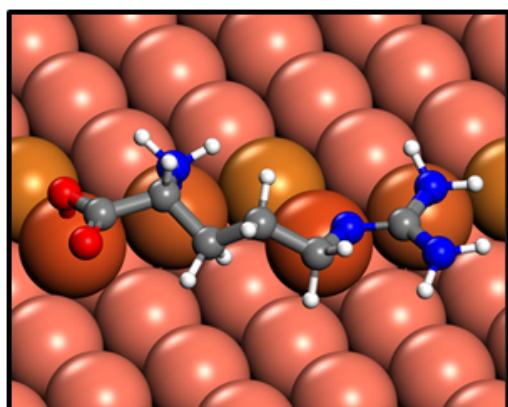

D-Arg

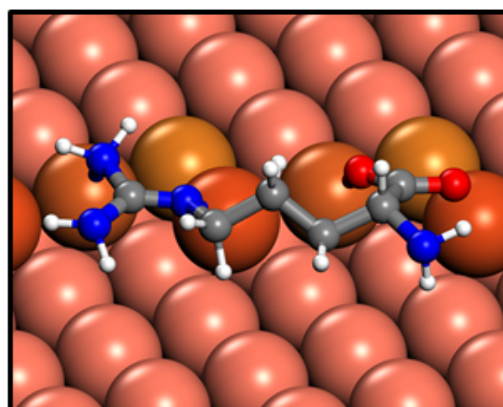

L-Arg

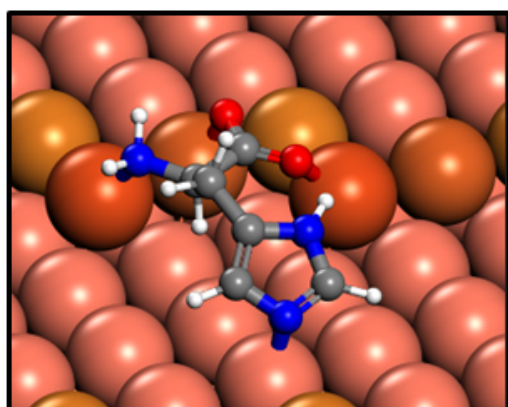

D-His

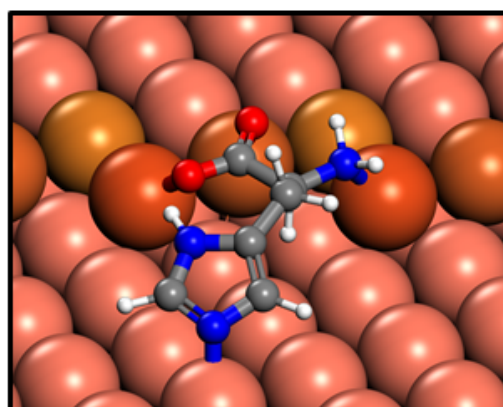

L-His

Figure S9 Adsorption structures of 18 types of AAs on chiral Cu(3,1,17)<sup>S</sup> surface.

### 7.3 Enantiospecific adsorption of Glu and Tyr.

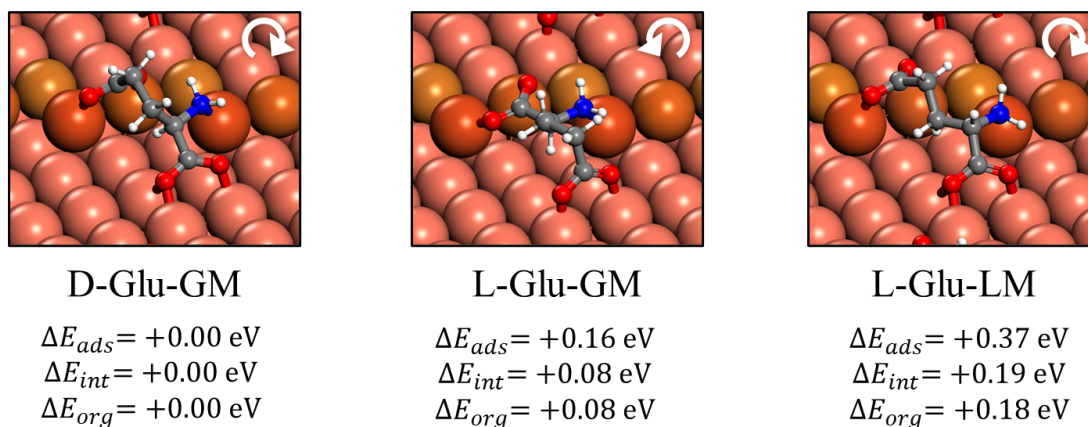

**Figure S10 Adsorption structures of Glu on Cu(3,1,17)<sup>5</sup> surface.** Indicated below each structure is  $\Delta E_{ads}$ ,  $\Delta E_{int}$ , and  $\Delta E_{org}$  values (see text) using the most stable adsorption system as the reference. In the figure, the white cycle arrow highlights the chirality recognition, following the sequence of amino  $\rightarrow$  carboxylate  $\rightarrow$  side chain.

**D/L-Glu.** For Glu, the D-form GM (D-Glu-GM) is 0.16 eV more stable than the L-form GM (L-Glu-GM). Both of them adopt the  $\mu_5$  configuration through the carboxylate-amino skeleton and two oxygen atoms in the carboxylate side chain, with the same copper sites involved for adsorption (two  $v$  sites, one  $e$  site, two  $t$  sites). But their adsorption chirality is different, clockwise in D-Glu-GM or counterclockwise in L-Glu-GM (Figure S10, white circle arrow) following the sequence from amino to carboxylate and to side chain. In this case, the amino group wins in binding on the defective site ( $v$ ) in both two structures, whereas the connectivity of the two carboxylate groups ( $\alpha$ -carboxylate, side chain carboxylate) varies. D-Glu-GM utilizes the  $\alpha$ -carboxylate group to bind on the {100} terrace ( $t$  sites) and side chain carboxylate group to bind on the step edge ( $v$ ,  $e$  sites). Differently, L-Glu-GM utilizes a reversed connectivity, with  $\alpha$ -carboxylate group binding on the step edge ( $v$ ,  $e$  sites) and side chain carboxylate group on the {100} terrace (two  $t$  sites). The different connectivity results in a 0.16 eV disadvantage of L-Glu-GM, with the deformation effect and interaction effect contributing approximately equal to the energetic discrimination ( $\Delta E_{org} = 0.08$  eV,  $\Delta E_{int} = 0.08$  eV). The last structure, L-Glu-LM, although adopts the same molecule-surface connectivity with D-Glu-GM, is however 0.37 eV less stable. With a reversed orientation of side chain and H atom (connected with the chiral  $\alpha$ -carbon atom), both constrained skeleton geometry ( $\Delta E_{org} = 0.18$  eV) and unfavorable binding orientations ( $\Delta E_{int} = 0.19$  eV) lead to an unfavorable adsorption.

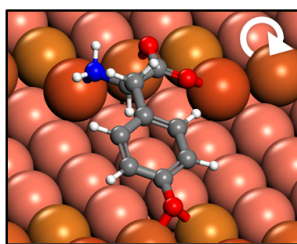

D-Tyr-GM

$$\Delta E_{ads} = +0.00 \text{ eV}$$

$$\Delta E_{int} = +0.00 \text{ eV}$$

$$\Delta E_{org} = +0.00 \text{ eV}$$

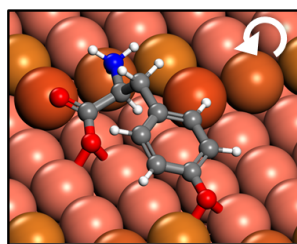

L-Tyr-GM

$$\Delta E_{ads} = +0.19 \text{ eV}$$

$$\Delta E_{int} = +0.49 \text{ eV}$$

$$\Delta E_{org} = -0.30 \text{ eV}$$

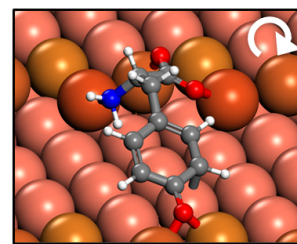

L-Tyr-LM

$$\Delta E_{ads} = +0.27 \text{ eV}$$

$$\Delta E_{int} = +0.17 \text{ eV}$$

$$\Delta E_{org} = +0.10 \text{ eV}$$

**Figure S11 Adsorption structures of Tyr on Cu(3,1,17)<sup>5</sup> surface.** Indicated below each structure is  $\Delta E_{ads}$ ,  $\Delta E_{int}$ , and  $\Delta E_{org}$  values (see text) using the most stable adsorption system as the reference. In the figure, the white cycle arrow highlights the chirality recognition, following the sequence of amino  $\rightarrow$  carboxylate  $\rightarrow$  side chain.

**D/L-Tyr.** For Tyr, the D-form GM (D-Tyr-GM) is 0.19 eV more stable than the L-form GM (L-Tyr-GM). Both of them utilize the carboxylate-amino skeleton to bind on the step edge (two  $v$  sites and one  $e$  site), with the side-chain phenol group binding on the {100} microfacet through the oxygen atom. The enantiomer-surface chiral recognition, as also indicated in Figure S11 by the white arrow, can also be understood as the result of the bonding competition of the phenol ring in the side-chain and the carboxylate-amino skeleton to the kinked Cu sites. Obviously, the phenol group fails to compete with carboxylate-amino skeleton to bind on the kinked sites since the imidazole ring, being rigid and bulky, cannot form a tri-dentation (two  $v$  sites and one  $e$  site) geometry (similar to D/L-His). As a result, in D-Tyr-GM, the two oxygen atoms of the carboxylate groups bind on a pair of adjacent  $v$  site and  $e$  site in {111} microfacet, along with the nitrogen atoms bind on another  $v$  site in {110} microfacet, whereas in L-Tyr-GM, the amino nitrogen atom binds on the  $e$  site of {111} microfacet, with the two carboxylate oxygen atoms bind on one  $v$  site and one  $t$  site. The binding of phenol group on {100} microfacet utilizes the bridge-( $e$ ,  $c$ ) site in D-Tyr-GM and the bridge-( $c$ ,  $t$ ) site in L-Tyr-GM. Obviously, the site in D-Tyr-GM is more defective and thus energetically favorable. So, it is not surprising that the L-Tyr-GM is an observable disadvantage in molecule-surface interaction ( $\Delta E_{int} = +0.49$  eV). Again, we found that the L-form with the same molecule-surface connectivity as D-Tyr-GM, is even more unstable ( $\Delta E_{ads} = +0.27$  eV), which can be attributed to both the constrained molecule geometry ( $\Delta E_{org} = +0.10$  eV) and the poor molecule-surface interaction ( $\Delta E_{int} = +0.17$  eV).

#### 7.4 Stability of carboxylic-amino skeleton in D/L-Asp

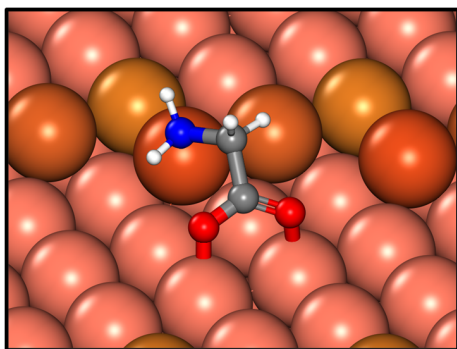

**Gly-LM-D-Asp**

$$\Delta E_{ads} = +0.00 \text{ eV}$$

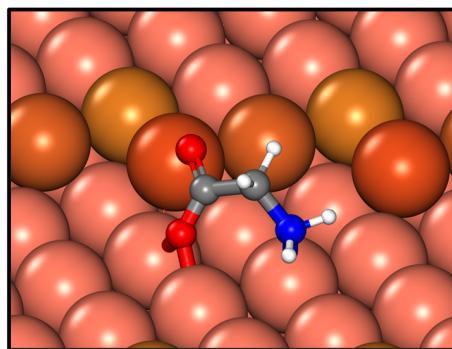

**Gly-LM-L-Asp**

$$\Delta E_{ads} = +0.24 \text{ eV}$$

**Figure S12 Adsorption configuration of carboxylic-amino skeleton in D/L-Asp.** The two structures depict LMs of the Gly/Cu(3,1,17)<sup>s</sup> adsorption system, utilized for modeling the stability of the carboxylate-amino skeleton in D/L-Asp. Their geometry and energy are acquired by relaxing the carboxylate-amino skeleton (with an additional H) in D-Asp-GM and L-Asp-GM, labeled as Gly-LM-D-Asp and Gly-LM-L-Asp. The energy difference ( $\Delta E_{ads}$ ) is calculated using Gly-LM-D-Asp as the reference. Based on  $\Delta E_{ads}$ , Gly-LM-L-Asp is +0.24 eV energetically less favorable than Gly-LM-D-Asp.

## 8. Dataset Summary of Cu-C-H-O-N quinary G-NN potential

**Table S4. Number of structures for the global dataset to train Cu-C-H-O-N G-NN potential.** Listed data include the species composition, the total number of atoms ( $N_{atom}$ ), and the number of structures with this composition ( $N_{struc}$ ). The dataset contains a total number of 125,658 structures.

| Species          | $N_{atom}$ | $N_{struc}$ | Species          | $N_{atom}$ | $N_{struc}$ | Species          | $N_{atom}$ | $N_{struc}$ |
|------------------|------------|-------------|------------------|------------|-------------|------------------|------------|-------------|
| Cu32             | 32         | 1           | Cu36             | 36         | 1           | Cu48             | 48         | 3           |
| Cu60             | 60         | 1           | Cu64             | 64         | 2           | Cu72             | 72         | 1           |
| Cu80             | 80         | 2           | Cu96             | 96         | 1           | Cu144            | 144        | 1           |
| O2-Cu36          | 38         | 2           | O3-Cu36          | 39         | 1           | O3-Cu48          | 51         | 1           |
| O4               | 4          | 34          | O5-Cu72          | 77         | 1           | O6-Cu48          | 54         | 1           |
| O11              | 11         | 295         | N1-Cu12          | 13         | 5           | N1-O1            | 2          | 35          |
| N2               | 2          | 31          | N2-Cu8           | 10         | 50          | N2-Cu10          | 12         | 8           |
| N2-Cu36          | 38         | 1           | N2-Cu48          | 50         | 1           | N2-O1            | 3          | 70          |
| N2-O1-Cu36       | 39         | 1           | N2-O3            | 5          | 94          | N2-O3-Cu36       | 41         | 1           |
| N2-O3-Cu48       | 53         | 1           | N2-O4            | 6          | 86          | N2-O4-Cu36       | 42         | 1           |
| N2-O4-Cu48       | 54         | 1           | N2-O5            | 7          | 107         | N3-Cu16          | 19         | 1           |
| N4-Cu8           | 12         | 320         | N4-Cu48          | 52         | 1           | N4-O1            | 5          | 1           |
| N4-O1-Cu36       | 41         | 1           | N4-O1-Cu48       | 53         | 2           | N4-O1-Cu72       | 77         | 1           |
| N4-O2-Cu36       | 42         | 2           | N6-Cu36          | 42         | 2           | N6-Cu48          | 54         | 1           |
| N12-Cu50         | 62         | 1           | C1-O3-Cu36       | 40         | 1           | C1-N2-Cu36       | 39         | 1           |
| C1-N2-O1-Cu36    | 40         | 1           | C1-N2-O2-Cu36    | 41         | 1           | C1-N2-O2-Cu48    | 53         | 4           |
| C1-N2-O3-Cu36    | 42         | 2           | C1-N2-O3-Cu48    | 54         | 4           | C1-N4-Cu36       | 41         | 1           |
| C1-N4-O1-Cu36    | 42         | 1           | C1-N4-O1-Cu48    | 54         | 4           | C1-N4-O2         | 7          | 1           |
| C1-N4-O3         | 8          | 1           | C1-N6-O1         | 8          | 1           | C2-Cu36          | 38         | 2           |
| C2-O2-Cu48       | 52         | 1           | C2-O3-Cu36       | 41         | 2           | C2-O3-Cu48       | 53         | 1           |
| C2-O4-Cu36       | 42         | 1           | C2-O4-Cu64       | 70         | 1           | C2-N2            | 4          | 102         |
| C2-N2-Cu36       | 40         | 2           | C2-N2-Cu48       | 52         | 3           | C2-N2-Cu72       | 76         | 2           |
| C2-N2-O1-Cu36    | 41         | 1           | C2-N2-O1-Cu64    | 69         | 1           | C2-N2-O1-Cu72    | 77         | 1           |
| C2-N2-O2-Cu36    | 42         | 1           | C2-N4-Cu48       | 54         | 2           | C2-N4-Cu72       | 78         | 1           |
| C2-N4-O2         | 8          | 1           | C2-N6-O1         | 9          | 1           | C3-O1-Cu36       | 40         | 1           |
| C3-O2-Cu36       | 41         | 1           | C3-O2-Cu48       | 53         | 1           | C3-N2-Cu48       | 53         | 2           |
| C3-N4-O2         | 9          | 1           | C4-Cu72          | 76         | 1           | C4-O2-Cu36       | 42         | 1           |
| C4-O2-Cu48       | 54         | 2           | C4-N2-Cu48       | 54         | 1           | C4-N2-Cu64       | 70         | 1           |
| C4-N2-Cu72       | 78         | 1           | C4-N2-Cu96       | 102        | 1           | C4-N4-O1         | 9          | 1           |
| C4-N8-O4         | 16         | 26          | C4-N8-O5         | 17         | 7           | C4-N8-O6         | 18         | 3           |
| C5-N8-O5         | 18         | 5           | C6-N8-O4         | 18         | 11          | H1-O1            | 2          | 1           |
| H1-N1-O1         | 3          | 65          | H1-N1-O1-Cu36    | 39         | 1           | H1-N1-O1-Cu48    | 51         | 2           |
| H1-N1-O2         | 4          | 171         | H1-N1-O2-Cu36    | 40         | 3           | H1-N1-O2-Cu48    | 52         | 1           |
| H1-N1-O3         | 5          | 176         | H1-N1-O3-Cu48    | 53         | 1           | H1-N1-O4         | 6          | 111         |
| H1-N1-O4-Cu36    | 42         | 1           | H1-N1-O4-Cu48    | 54         | 1           | H1-N1-O4-Cu72    | 78         | 1           |
| H1-N1-O5-Cu96    | 103        | 1           | H1-N3-Cu48       | 52         | 1           | H1-N3-Cu72       | 76         | 1           |
| H1-N3-O1-Cu36    | 41         | 2           | H1-N3-O1-Cu48    | 53         | 2           | H1-N3-O1-Cu72    | 77         | 1           |
| H1-N3-O2-Cu36    | 42         | 1           | H1-N3-O2-Cu48    | 54         | 3           | H1-N3-O3-Cu48    | 55         | 2           |
| H1-N5-Cu36       | 42         | 1           | H1-N5-Cu48       | 54         | 1           | H1-N5-O1-Cu48    | 55         | 1           |
| H1-C1-N1         | 3          | 145         | H1-C1-N1-O1      | 4          | 173         | H1-C1-N1-O1-Cu36 | 40         | 2           |
| H1-C1-N1-O1-Cu48 | 52         | 3           | H1-C1-N1-O2-Cu36 | 41         | 2           | H1-C1-N1-O2-Cu48 | 53         | 4           |
| H1-C1-N1-O3-Cu36 | 42         | 3           | H1-C1-N1-O3-Cu48 | 54         | 1           | H1-C1-N1-O3-Cu72 | 78         | 2           |
| H1-C1-N1-O4-Cu36 | 43         | 5           | H1-C1-N1-O4-Cu48 | 55         | 4           | H1-C1-N1-O4-Cu96 | 103        | 1           |
| H1-C1-N3-Cu36    | 41         | 2           | H1-C1-N3-O1-Cu36 | 42         | 4           | H1-C1-N3-O1-Cu48 | 54         | 6           |
| H1-C1-N3-O1-Cu64 | 70         | 1           | H1-C1-N3-O1-Cu72 | 78         | 1           | H1-C1-N3-O2      | 7          | 1           |
| H1-C1-N3-O2-Cu36 | 43         | 1           | H1-C1-N3-O2-Cu48 | 55         | 8           | H1-C1-N3-O2-Cu64 | 71         | 1           |
| H1-C1-N5-Cu48    | 55         | 5           | H1-C1-N5-Cu64    | 71         | 1           | H1-C1-N5-Cu72    | 79         | 1           |
| H1-C1-N5-O1      | 8          | 1           | H1-C2-N1-Cu36    | 40         | 1           | H1-C2-N1-Cu48    | 52         | 1           |
| H1-C2-N1-O1-Cu48 | 53         | 3           | H1-C2-N1-O1-Cu72 | 77         | 1           | H1-C2-N1-O2-Cu36 | 42         | 2           |
| H1-C2-N1-O2-Cu48 | 54         | 4           | H1-C2-N1-O2-Cu64 | 70         | 1           | H1-C2-N1-O2-Cu72 | 78         | 5           |



|                  |     |      |                  |     |      |                  |     |       |
|------------------|-----|------|------------------|-----|------|------------------|-----|-------|
| H1-C2-N1-O3-Cu36 | 43  | 2    | H1-C2-N1-O3-Cu48 | 55  | 6    | H1-C2-N1-O3-Cu64 | 71  | 3     |
| H1-C2-N1-O3-Cu72 | 79  | 2    | H1-C2-N3-Cu36    | 42  | 1    | H1-C2-N3-Cu48    | 54  | 7     |
| H1-C2-N3-Cu64    | 70  | 1    | H1-C2-N3-Cu72    | 78  | 1    | H1-C2-N3-O1-Cu36 | 43  | 1     |
| H1-C2-N3-O1-Cu48 | 55  | 5    | H1-C2-N3-O1-Cu72 | 79  | 2    | H1-C2-N3-O2      | 8   | 1     |
| H1-C2-N3-O3      | 9   | 2    | H1-C2-N3-O4      | 10  | 2    | H1-C2-N5-O1      | 9   | 1     |
| H1-C2-N5-O2      | 10  | 4    | H1-C3-N1         | 5   | 122  | H1-C3-N1-Cu72    | 77  | 2     |
| H1-C3-N1-O1-Cu36 | 42  | 2    | H1-C3-N1-O1-Cu48 | 54  | 4    | H1-C3-N1-O1-Cu64 | 70  | 2     |
| H1-C3-N1-O1-Cu72 | 78  | 6    | H1-C3-N1-O2-Cu48 | 55  | 1    | H1-C3-N1-O2-Cu72 | 79  | 2     |
| H1-C3-N3-Cu36    | 43  | 1    | H1-C3-N3-O2      | 9   | 1    | H1-C3-N5-O1      | 10  | 2     |
| H1-C3-N5-O2      | 11  | 12   | H1-C3-N5-O3      | 12  | 11   | H1-C4-N1-Cu48    | 54  | 1     |
| H1-C4-N1-O1-Cu48 | 55  | 5    | H1-C4-N1-O1-Cu64 | 71  | 1    | H1-C4-N1-O1-Cu72 | 79  | 2     |
| H1-C4-N5         | 10  | 1    | H1-C5-N1-Cu48    | 55  | 1    | H1-C5-N1-Cu64    | 71  | 1     |
| H1-C5-N1-Cu96    | 103 | 1    | H1-C5-N3-O1      | 10  | 1    | H1-C5-N3-O1-Cu30 | 40  | 8     |
| H1-C5-N3-O1-Cu36 | 46  | 50   | H1-C5-N7-O5      | 18  | 14   | H1-C5-N7-O6      | 19  | 29    |
| H2               | 2   | 2    | H2-O1            | 3   | 1    | H2-O1-Cu27       | 30  | 450   |
| H2-O1-Cu48       | 51  | 1    | H2-O2-Cu48       | 52  | 1    | H2-N1-Cu20       | 23  | 15    |
| H2-N2            | 4   | 61   | H2-N2-Cu8        | 12  | 13   | H2-N2-Cu36       | 40  | 1     |
| H2-N2-O1-Cu36    | 41  | 3    | H2-N2-O1-Cu48    | 53  | 2    | H2-N2-O1-Cu72    | 77  | 1     |
| H2-N2-O2         | 6   | 171  | H2-N2-O2-Cu36    | 42  | 2    | H2-N2-O2-Cu48    | 54  | 3     |
| H2-N2-O2-Cu64    | 70  | 1    | H2-N2-O3-Cu36    | 43  | 2    | H2-N2-O3-Cu48    | 55  | 2     |
| H2-N2-O4-Cu48    | 56  | 3    | H2-N4-Cu48       | 54  | 1    | H2-N4-Cu64       | 70  | 1     |
| H2-N4-O1-Cu48    | 55  | 2    | H2-N4-O2-Cu36    | 44  | 1    | H2-N4-O2-Cu48    | 56  | 2     |
| H2-N4-O2-Cu64    | 72  | 1    | H2-N4-O2-Cu72    | 80  | 1    | H2-N6-Cu60       | 68  | 1     |
| H2-C1            | 3   | 5    | H2-C1-O1         | 4   | 111  | H2-C1-O1-Cu36    | 40  | 1     |
| H2-C1-O2         | 5   | 41   | H2-C1-O2-Cu11    | 16  | 27   | H2-C1-O2-Cu12    | 17  | 16238 |
| H2-C1-O2-Cu16    | 21  | 635  | H2-C1-O2-Cu27    | 32  | 651  | H2-C1-O2-Cu36    | 41  | 3     |
| H2-C1-O3         | 6   | 11   | H2-C1-O3-Cu36    | 42  | 1    | H2-C1-O4-Cu36    | 43  | 1     |
| H2-C1-O4-Cu48    | 55  | 1    | H2-C1-O4-Cu72    | 79  | 1    | H2-C1-O5-Cu72    | 80  | 1     |
| H2-C1-N2         | 5   | 185  | H2-C1-N2-Cu36    | 41  | 3    | H2-C1-N2-Cu48    | 53  | 3     |
| H2-C1-N2-Cu64    | 69  | 1    | H2-C1-N2-O1-Cu36 | 42  | 4    | H2-C1-N2-O1-Cu48 | 54  | 8     |
| H2-C1-N2-O2-Cu36 | 43  | 4    | H2-C1-N2-O2-Cu48 | 55  | 14   | H2-C1-N2-O2-Cu64 | 71  | 3     |
| H2-C1-N2-O2-Cu72 | 79  | 1    | H2-C1-N2-O3-Cu36 | 44  | 1    | H2-C1-N2-O3-Cu48 | 56  | 11    |
| H2-C1-N2-O3-Cu72 | 80  | 4    | H2-C1-N2-O3-Cu96 | 104 | 2    | H2-C1-N2-O4-Cu35 | 44  | 3     |
| H2-C1-N2-O4-Cu36 | 45  | 59   | H2-C1-N4         | 7   | 103  | H2-C1-N4-Cu48    | 55  | 6     |
| H2-C1-N4-Cu64    | 71  | 1    | H2-C1-N4-Cu72    | 79  | 2    | H2-C1-N4-Cu96    | 103 | 1     |
| H2-C1-N4-O1-Cu36 | 44  | 2    | H2-C1-N4-O1-Cu48 | 56  | 8    | H2-C1-N4-O1-Cu64 | 72  | 1     |
| H2-C1-N4-O1-Cu72 | 80  | 2    | H2-C1-N4-O1-Cu80 | 88  | 1    | H2-C1-N4-O1-Cu96 | 104 | 1     |
| H2-C2            | 4   | 92   | H2-C2-Cu48       | 52  | 1    | H2-C2-O1-Cu36    | 41  | 2     |
| H2-C2-O1-Cu48    | 53  | 1    | H2-C2-O1-Cu72    | 77  | 2    | H2-C2-O2-Cu36    | 42  | 4     |
| H2-C2-O2-Cu48    | 54  | 2    | H2-C2-O2-Cu72    | 78  | 1    | H2-C2-O3-Cu27    | 34  | 1474  |
| H2-C2-O3-Cu36    | 43  | 1948 | H2-C2-O3-Cu48    | 55  | 2    | H2-C2-O3-Cu72    | 79  | 1     |
| H2-C2-O4-Cu36    | 44  | 1    | H2-C2-O4-Cu48    | 56  | 4    | H2-C2-O4-Cu64    | 72  | 1     |
| H2-C2-O4-Cu72    | 80  | 1    | H2-C2-N2         | 6   | 2    | H2-C2-N2-Cu36    | 42  | 4     |
| H2-C2-N2-Cu48    | 54  | 6    | H2-C2-N2-Cu64    | 70  | 1    | H2-C2-N2-Cu72    | 78  | 3     |
| H2-C2-N2-O1      | 7   | 89   | H2-C2-N2-O1-Cu36 | 43  | 9    | H2-C2-N2-O1-Cu48 | 55  | 9     |
| H2-C2-N2-O1-Cu64 | 71  | 2    | H2-C2-N2-O1-Cu72 | 79  | 2    | H2-C2-N2-O1-Cu96 | 103 | 1     |
| H2-C2-N2-O2      | 8   | 181  | H2-C2-N2-O2-Cu36 | 44  | 10   | H2-C2-N2-O2-Cu48 | 56  | 21    |
| H2-C2-N2-O2-Cu60 | 68  | 3    | H2-C2-N2-O2-Cu64 | 72  | 7    | H2-C2-N2-O2-Cu72 | 80  | 8     |
| H2-C2-N2-O2-Cu96 | 104 | 6    | H2-C2-N4         | 8   | 37   | H2-C2-N4-Cu36    | 44  | 3     |
| H2-C2-N4-Cu48    | 56  | 8    | H2-C2-N4-Cu64    | 72  | 2    | H2-C2-N4-Cu72    | 80  | 4     |
| H2-C2-N4-O1      | 9   | 2    | H2-C2-N4-O2      | 10  | 3    | H2-C2-N4-O3      | 11  | 2     |
| H2-C2-N6         | 10  | 4    | H2-C2-N6-O1      | 11  | 6    | H2-C3-Cu36       | 41  | 1     |
| H2-C3-O1-Cu36    | 42  | 3    | H2-C3-O1-Cu48    | 54  | 5    | H2-C3-O1-Cu72    | 78  | 1     |
| H2-C3-O2-Cu36    | 43  | 3    | H2-C3-O2-Cu48    | 55  | 7    | H2-C3-O2-Cu64    | 71  | 2     |
| H2-C3-O2-Cu72    | 79  | 2    | H2-C3-O3-Cu48    | 56  | 5    | H2-C3-O3-Cu64    | 72  | 2     |
| H2-C3-O3-Cu72    | 80  | 5    | H2-C3-O3-Cu96    | 104 | 2    | H2-C3-O4-Cu33    | 42  | 713   |
| H2-C3-O4-Cu35    | 44  | 743  | H2-C3-O4-Cu36    | 45  | 1508 | H2-C3-N2-Cu36    | 43  | 4     |
| H2-C3-N2-Cu48    | 55  | 5    | H2-C3-N2-Cu64    | 71  | 6    | H2-C3-N2-Cu72    | 79  | 3     |
| H2-C3-N2-Cu96    | 103 | 4    | H2-C3-N2-O1-Cu36 | 44  | 3    | H2-C3-N2-O1-Cu48 | 56  | 10    |
| H2-C3-N2-O1-Cu64 | 72  | 3    | H2-C3-N2-O1-Cu72 | 80  | 3    | H2-C3-N2-O1-Cu96 | 104 | 3     |
| H2-C3-N2-O2      | 9   | 1    | H2-C3-N2-O3      | 10  | 17   | H2-C3-N2-O4      | 11  | 14    |

|                  |     |     |                   |     |     |                   |     |     |
|------------------|-----|-----|-------------------|-----|-----|-------------------|-----|-----|
| H2-C3-N4         | 9   | 2   | H2-C3-N4-O1       | 10  | 3   | H2-C3-N4-O2       | 11  | 8   |
| H2-C3-N4-O3      | 12  | 23  | H2-C3-N4-O4       | 13  | 15  | H2-C3-N6          | 11  | 1   |
| H2-C4-Cu36       | 42  | 1   | H2-C4-Cu48        | 54  | 4   | H2-C4-Cu72        | 78  | 1   |
| H2-C4-O1-Cu36    | 43  | 2   | H2-C4-O1-Cu48     | 55  | 6   | H2-C4-O1-Cu64     | 71  | 1   |
| H2-C4-O1-Cu72    | 79  | 2   | H2-C4-O1-Cu80     | 87  | 1   | H2-C4-O1-Cu96     | 103 | 2   |
| H2-C4-O2-Cu48    | 56  | 1   | H2-C4-O2-Cu64     | 72  | 2   | H2-C4-O2-Cu72     | 80  | 6   |
| H2-C4-O2-Cu96    | 104 | 2   | H2-C4-O3          | 9   | 66  | H2-C4-O4          | 10  | 2   |
| H2-C4-O5         | 11  | 8   | H2-C4-N2-Cu36     | 44  | 1   | H2-C4-N2-Cu48     | 56  | 6   |
| H2-C4-N2-Cu64    | 72  | 1   | H2-C4-N2-Cu72     | 80  | 5   | H2-C4-N2-O1       | 9   | 93  |
| H2-C4-N4-O1      | 11  | 8   | H2-C4-N4-O3       | 13  | 24  | H2-C5-Cu48        | 55  | 3   |
| H2-C5-Cu72       | 79  | 1   | H2-C5-O1-Cu48     | 56  | 2   | H2-C5-O1-Cu60     | 68  | 1   |
| H2-C5-O1-Cu72    | 80  | 4   | H2-C5-O3          | 10  | 6   | H2-C5-O4          | 11  | 6   |
| H2-C5-N4         | 11  | 1   | H2-C5-N6-O5       | 18  | 6   | H2-C5-N6-O6       | 19  | 12  |
| H2-C5-N6-O7      | 20  | 12  | H2-C5-N8-O4       | 19  | 20  | H2-C5-N8-O5       | 20  | 35  |
| H2-C6-Cu120      | 128 | 1   | H2-C6-O2          | 10  | 2   | H2-C6-N6-O5       | 19  | 3   |
| H2-C6-N6-O6      | 20  | 4   | H2-C7-O1          | 10  | 2   | H2-C7-N6-O4       | 19  | 12  |
| H2-C7-N6-O5      | 20  | 29  | H2-C10-N6-O2-Cu58 | 78  | 1   | H2-C10-N6-O2-Cu62 | 82  | 2   |
| H3-N1            | 4   | 44  | H3-N1-Cu36        | 40  | 15  | H3-N1-Cu48        | 52  | 1   |
| H3-N1-O1         | 5   | 86  | H3-N1-O1-Cu36     | 41  | 2   | H3-N1-O1-Cu48     | 53  | 1   |
| H3-N1-O2-Cu36    | 42  | 2   | H3-N1-O2-Cu48     | 54  | 1   | H3-N1-O2-Cu72     | 78  | 2   |
| H3-N1-O3-Cu48    | 55  | 3   | H3-N1-O4-Cu36     | 44  | 1   | H3-N1-O4-Cu96     | 104 | 1   |
| H3-N2-Cu22       | 27  | 3   | H3-N2-Cu35        | 40  | 6   | H3-N3-Cu48        | 54  | 1   |
| H3-N3-O1-Cu36    | 43  | 1   | H3-N3-O1-Cu72     | 79  | 1   | H3-N3-O1-Cu96     | 103 | 1   |
| H3-N3-O2-Cu36    | 44  | 2   | H3-N3-O2-Cu48     | 56  | 3   | H3-N3-O2-Cu64     | 72  | 1   |
| H3-N3-O2-Cu72    | 80  | 1   | H3-N3-O3-Cu36     | 45  | 1   | H3-N3-O3-Cu48     | 57  | 2   |
| H3-N3-O3-Cu72    | 81  | 1   | H3-N5-Cu48        | 56  | 1   | H3-N5-Cu96        | 104 | 1   |
| H3-N5-O1-Cu48    | 57  | 2   | H3-N5-O1-Cu72     | 81  | 1   | H3-C1             | 4   | 8   |
| H3-C1-O2-Cu18    | 24  | 478 | H3-C1-N1          | 5   | 249 | H3-C1-N1-Cu48     | 53  | 1   |
| H3-C1-N1-O1      | 6   | 139 | H3-C1-N1-O1-Cu36  | 42  | 2   | H3-C1-N1-O1-Cu48  | 54  | 2   |
| H3-C1-N1-O1-Cu72 | 78  | 1   | H3-C1-N1-O2       | 7   | 221 | H3-C1-N1-O2-Cu36  | 43  | 39  |
| H3-C1-N1-O2-Cu48 | 55  | 6   | H3-C1-N1-O2-Cu72  | 79  | 2   | H3-C1-N1-O2-Cu96  | 103 | 1   |
| H3-C1-N1-O3      | 8   | 57  | H3-C1-N1-O3-Cu36  | 44  | 6   | H3-C1-N1-O3-Cu48  | 56  | 8   |
| H3-C1-N1-O3-Cu72 | 80  | 4   | H3-C1-N1-O3-Cu96  | 104 | 1   | H3-C1-N1-O4-Cu36  | 45  | 1   |
| H3-C1-N1-O4-Cu48 | 57  | 4   | H3-C1-N1-O4-Cu64  | 73  | 1   | H3-C1-N1-O4-Cu72  | 81  | 2   |
| H3-C1-N3-Cu36    | 43  | 1   | H3-C1-N3-Cu48     | 55  | 9   | H3-C1-N3-Cu64     | 71  | 1   |
| H3-C1-N3-Cu72    | 79  | 2   | H3-C1-N3-O1-Cu36  | 44  | 3   | H3-C1-N3-O1-Cu48  | 56  | 9   |
| H3-C1-N3-O1-Cu64 | 72  | 2   | H3-C1-N3-O1-Cu72  | 80  | 2   | H3-C1-N3-O1-Cu96  | 104 | 2   |
| H3-C1-N3-O2-Cu36 | 45  | 2   | H3-C1-N3-O2-Cu48  | 57  | 6   | H3-C1-N3-O2-Cu60  | 69  | 1   |
| H3-C1-N3-O2-Cu64 | 73  | 5   | H3-C1-N3-O2-Cu72  | 81  | 4   | H3-C1-N3-O2-Cu96  | 105 | 2   |
| H3-C1-N5-Cu48    | 57  | 2   | H3-C1-N5-Cu60     | 69  | 2   | H3-C1-N5-Cu64     | 73  | 2   |
| H3-C1-N5-Cu80    | 89  | 1   | H3-C1-N7          | 11  | 1   | H3-C2-O2-Cu31     | 38  | 6   |
| H3-C2-O2-Cu32    | 39  | 6   | H3-C2-O2-Cu36     | 43  | 805 | H3-C2-O3-Cu23     | 31  | 55  |
| H3-C2-O3-Cu24    | 32  | 222 | H3-C2-O3-Cu27     | 35  | 74  | H3-C2-N1          | 6   | 182 |
| H3-C2-N1-Cu36    | 42  | 2   | H3-C2-N1-Cu48     | 54  | 3   | H3-C2-N1-Cu72     | 78  | 1   |
| H3-C2-N1-O1      | 7   | 173 | H3-C2-N1-O1-Cu36  | 43  | 6   | H3-C2-N1-O1-Cu48  | 55  | 14  |
| H3-C2-N1-O1-Cu64 | 71  | 2   | H3-C2-N1-O1-Cu72  | 79  | 5   | H3-C2-N1-O1-Cu96  | 103 | 2   |
| H3-C2-N1-O2      | 8   | 95  | H3-C2-N1-O2-Cu36  | 44  | 6   | H3-C2-N1-O2-Cu48  | 56  | 13  |
| H3-C2-N1-O2-Cu64 | 72  | 4   | H3-C2-N1-O2-Cu72  | 80  | 6   | H3-C2-N1-O2-Cu96  | 104 | 2   |
| H3-C2-N1-O3      | 9   | 61  | H3-C2-N1-O3-Cu36  | 45  | 4   | H3-C2-N1-O3-Cu48  | 57  | 18  |
| H3-C2-N1-O3-Cu64 | 73  | 10  | H3-C2-N1-O3-Cu72  | 81  | 6   | H3-C2-N1-O3-Cu96  | 105 | 5   |
| H3-C2-N3         | 8   | 438 | H3-C2-N3-Cu36     | 44  | 8   | H3-C2-N3-Cu48     | 56  | 6   |
| H3-C2-N3-Cu64    | 72  | 5   | H3-C2-N3-Cu72     | 80  | 1   | H3-C2-N3-Cu96     | 104 | 1   |
| H3-C2-N3-O1      | 9   | 87  | H3-C2-N3-O1-Cu36  | 45  | 6   | H3-C2-N3-O1-Cu48  | 57  | 22  |
| H3-C2-N3-O1-Cu60 | 69  | 1   | H3-C2-N3-O1-Cu64  | 73  | 9   | H3-C2-N3-O1-Cu72  | 81  | 14  |
| H3-C2-N3-O1-Cu96 | 105 | 6   | H3-C2-N3-O2       | 10  | 2   | H3-C2-N5          | 10  | 1   |
| H3-C2-N5-O1      | 11  | 8   | H3-C2-N5-O2       | 12  | 3   | H3-C2-N7          | 12  | 4   |
| H3-C3-N1         | 7   | 186 | H3-C3-N1-Cu48     | 55  | 3   | H3-C3-N1-Cu64     | 71  | 1   |
| H3-C3-N1-Cu72    | 79  | 3   | H3-C3-N1-O1       | 8   | 394 | H3-C3-N1-O1-Cu36  | 44  | 7   |
| H3-C3-N1-O1-Cu48 | 56  | 23  | H3-C3-N1-O1-Cu60  | 68  | 1   | H3-C3-N1-O1-Cu64  | 72  | 9   |
| H3-C3-N1-O1-Cu72 | 80  | 15  | H3-C3-N1-O1-Cu96  | 104 | 5   | H3-C3-N1-O2       | 9   | 257 |
| H3-C3-N1-O2-Cu36 | 45  | 6   | H3-C3-N1-O2-Cu48  | 57  | 35  | H3-C3-N1-O2-Cu60  | 69  | 2   |

|                  |     |      |                  |     |      |                   |     |      |
|------------------|-----|------|------------------|-----|------|-------------------|-----|------|
| H3-C3-N1-O2-Cu64 | 73  | 12   | H3-C3-N1-O2-Cu72 | 81  | 11   | H3-C3-N1-O2-Cu96  | 105 | 14   |
| H3-C3-N1-O3      | 10  | 27   | H3-C3-N3-Cu36    | 45  | 5    | H3-C3-N3-Cu48     | 57  | 16   |
| H3-C3-N3-Cu60    | 69  | 1    | H3-C3-N3-Cu64    | 73  | 2    | H3-C3-N3-Cu72     | 81  | 3    |
| H3-C3-N3-Cu96    | 105 | 6    | H3-C3-N3-Cu120   | 129 | 1    | H3-C3-N3-O1       | 10  | 1    |
| H3-C3-N3-O2      | 11  | 6    | H3-C3-N3-O3      | 12  | 104  | H3-C3-N5          | 11  | 5    |
| H3-C3-N5-O1      | 12  | 10   | H3-C4-N1-Cu48    | 56  | 8    | H3-C4-N1-Cu64     | 72  | 6    |
| H3-C4-N1-Cu72    | 80  | 4    | H3-C4-N1-Cu80    | 88  | 1    | H3-C4-N1-Cu96     | 104 | 2    |
| H3-C4-N1-O1-Cu48 | 57  | 9    | H3-C4-N1-O1-Cu60 | 69  | 1    | H3-C4-N1-O1-Cu64  | 73  | 13   |
| H3-C4-N1-O1-Cu72 | 81  | 7    | H3-C4-N1-O1-Cu96 | 105 | 7    | H3-C4-N1-O1-Cu120 | 129 | 1    |
| H3-C4-N1-O2      | 10  | 38   | H3-C4-N1-O3      | 11  | 53   | H3-C4-N1-O4       | 12  | 15   |
| H3-C4-N3         | 10  | 2    | H3-C4-N3-O1      | 11  | 52   | H3-C4-N3-O2       | 12  | 5    |
| H3-C4-N3-O3      | 13  | 7    | H3-C4-N3-O4      | 14  | 25   | H3-C4-N5          | 12  | 9    |
| H3-C4-N5-O2      | 14  | 18   | H3-C4-N9-O3      | 19  | 1    | H3-C4-N9-O4       | 20  | 3    |
| H3-C5-N1-Cu48    | 57  | 1    | H3-C5-N1-Cu60    | 69  | 2    | H3-C5-N1-Cu64     | 73  | 3    |
| H3-C5-N1-Cu72    | 81  | 3    | H3-C5-N1-Cu80    | 89  | 2    | H3-C5-N1-Cu96     | 105 | 2    |
| H3-C5-N1-O2      | 11  | 1    | H3-C5-N3-O1      | 12  | 3    | H3-C5-N7-O4       | 19  | 3    |
| H3-C5-N7-O5      | 20  | 29   | H3-C5-N7-O6      | 21  | 18   | H3-C5-N9-O3       | 20  | 3    |
| H3-C6-N3-O2      | 14  | 22   | H3-C6-N5-O6      | 20  | 2    | H3-C6-N5-O7       | 21  | 10   |
| H3-C6-N7-O4      | 20  | 6    | H3-C6-N7-O5      | 21  | 9    | H3-C7-N1-O3       | 14  | 7    |
| H3-C7-N7-O4      | 21  | 10   | H3-C8-N5-O5      | 21  | 12   | H4-N1-Cu36        | 41  | 46   |
| H4-N2            | 6   | 83   | H4-N2-Cu17       | 23  | 1    | H4-N2-O1-Cu48     | 55  | 2    |
| H4-N2-O2-Cu48    | 56  | 2    | H4-N2-O2-Cu72    | 80  | 1    | H4-N2-O3-Cu36     | 45  | 1    |
| H4-N2-O3-Cu48    | 57  | 1    | H4-N2-O3-Cu96    | 105 | 1    | H4-N2-O4-Cu48     | 58  | 2    |
| H4-N2-O4-Cu64    | 74  | 1    | H4-N2-O4-Cu96    | 106 | 2    | H4-N4-Cu48        | 56  | 1    |
| H4-N4-Cu72       | 80  | 1    | H4-N4-O1-Cu36    | 45  | 3    | H4-N4-O1-Cu48     | 57  | 1    |
| H4-N4-O2-Cu48    | 58  | 2    | H4-N6-Cu64       | 74  | 1    | H4-N6-Cu72        | 82  | 1    |
| H4-C1            | 5   | 138  | H4-C1-Cu36       | 41  | 1    | H4-C1-O1          | 6   | 42   |
| H4-C1-O1-Cu12    | 18  | 970  | H4-C1-O1-Cu36    | 42  | 1    | H4-C1-O2          | 7   | 7    |
| H4-C1-O2-Cu36    | 43  | 1    | H4-C1-O3-Cu27    | 35  | 5936 | H4-C1-O3-Cu36     | 44  | 1    |
| H4-C1-O3-Cu48    | 56  | 1    | H4-C1-O3-Cu72    | 80  | 2    | H4-C1-O4-Cu36     | 45  | 2    |
| H4-C1-O4-Cu48    | 57  | 2    | H4-C1-O4-Cu64    | 73  | 1    | H4-C1-O4-Cu72     | 81  | 1    |
| H4-C1-O5-Cu36    | 46  | 1    | H4-C1-O5-Cu48    | 58  | 2    | H4-C1-O5-Cu64     | 74  | 1    |
| H4-C1-N2         | 7   | 143  | H4-C1-N2-Cu36    | 43  | 62   | H4-C1-N2-Cu48     | 55  | 2    |
| H4-C1-N2-Cu72    | 79  | 1    | H4-C1-N2-O1      | 8   | 68   | H4-C1-N2-O1-Cu36  | 44  | 3    |
| H4-C1-N2-O1-Cu48 | 56  | 7    | H4-C1-N2-O1-Cu64 | 72  | 1    | H4-C1-N2-O1-Cu72  | 80  | 2    |
| H4-C1-N2-O2-Cu36 | 45  | 5    | H4-C1-N2-O2-Cu48 | 57  | 8    | H4-C1-N2-O2-Cu64  | 73  | 3    |
| H4-C1-N2-O2-Cu72 | 81  | 2    | H4-C1-N2-O2-Cu96 | 105 | 2    | H4-C1-N2-O3-Cu36  | 46  | 6    |
| H4-C1-N2-O3-Cu48 | 58  | 8    | H4-C1-N2-O3-Cu64 | 74  | 4    | H4-C1-N2-O3-Cu72  | 82  | 1    |
| H4-C1-N4-Cu36    | 45  | 3    | H4-C1-N4-Cu48    | 57  | 15   | H4-C1-N4-Cu64     | 73  | 4    |
| H4-C1-N4-Cu72    | 81  | 1    | H4-C1-N4-Cu96    | 105 | 3    | H4-C1-N4-O1-Cu36  | 46  | 1    |
| H4-C1-N4-O1-Cu48 | 58  | 9    | H4-C1-N4-O1-Cu64 | 74  | 4    | H4-C1-N4-O1-Cu72  | 82  | 3    |
| H4-C1-N4-O1-Cu96 | 106 | 7    | H4-C2            | 6   | 37   | H4-C2-Cu36        | 42  | 2    |
| H4-C2-O1         | 7   | 163  | H4-C2-O1-Cu36    | 43  | 4    | H4-C2-O1-Cu48     | 55  | 3    |
| H4-C2-O1-Cu72    | 79  | 2    | H4-C2-O2         | 8   | 59   | H4-C2-O2-Cu27     | 35  | 71   |
| H4-C2-O2-Cu33    | 41  | 577  | H4-C2-O2-Cu36    | 44  | 587  | H4-C2-O2-Cu48     | 56  | 9    |
| H4-C2-O2-Cu64    | 72  | 1    | H4-C2-O2-Cu72    | 80  | 4    | H4-C2-O2-Cu96     | 104 | 1    |
| H4-C2-O3-Cu36    | 45  | 240  | H4-C2-O3-Cu48    | 57  | 9    | H4-C2-O3-Cu64     | 73  | 2    |
| H4-C2-O3-Cu72    | 81  | 5    | H4-C2-O3-Cu96    | 105 | 1    | H4-C2-O4-Cu11     | 21  | 37   |
| H4-C2-O4-Cu12    | 22  | 6332 | H4-C2-O4-Cu24    | 34  | 306  | H4-C2-O4-Cu26     | 36  | 45   |
| H4-C2-O4-Cu27    | 37  | 2567 | H4-C2-O4-Cu32    | 42  | 109  | H4-C2-O4-Cu36     | 46  | 1755 |
| H4-C2-O4-Cu48    | 58  | 6    | H4-C2-O4-Cu64    | 74  | 9    | H4-C2-O4-Cu72     | 82  | 3    |
| H4-C2-O4-Cu96    | 106 | 6    | H4-C2-N1-O2-Cu24 | 33  | 15   | H4-C2-N1-O2-Cu27  | 36  | 8    |
| H4-C2-N1-O2-Cu32 | 41  | 17   | H4-C2-N1-O2-Cu36 | 45  | 52   | H4-C2-N1-O2-Cu48  | 57  | 20   |
| H4-C2-N1-O2-Cu54 | 63  | 12   | H4-C2-N1-O2-Cu72 | 81  | 8    | H4-C2-N1-O2-Cu144 | 153 | 11   |
| H4-C2-N2         | 8   | 71   | H4-C2-N2-Cu36    | 44  | 3    | H4-C2-N2-Cu48     | 56  | 14   |
| H4-C2-N2-Cu64    | 72  | 4    | H4-C2-N2-Cu72    | 80  | 5    | H4-C2-N2-Cu96     | 104 | 1    |
| H4-C2-N2-O1-Cu36 | 45  | 11   | H4-C2-N2-O1-Cu48 | 57  | 29   | H4-C2-N2-O1-Cu64  | 73  | 11   |
| H4-C2-N2-O1-Cu72 | 81  | 8    | H4-C2-N2-O1-Cu80 | 89  | 1    | H4-C2-N2-O1-Cu96  | 105 | 13   |
| H4-C2-N2-O2-Cu36 | 46  | 6    | H4-C2-N2-O2-Cu48 | 58  | 26   | H4-C2-N2-O2-Cu60  | 70  | 1    |
| H4-C2-N2-O2-Cu64 | 74  | 21   | H4-C2-N2-O2-Cu72 | 82  | 17   | H4-C2-N2-O2-Cu80  | 90  | 1    |
| H4-C2-N2-O2-Cu96 | 106 | 25   | H4-C2-N4         | 10  | 3    | H4-C2-N4-Cu48     | 58  | 15   |

|                  |     |    |                  |     |    |                   |     |     |
|------------------|-----|----|------------------|-----|----|-------------------|-----|-----|
| H4-C2-N4-Cu60    | 70  | 1  | H4-C2-N4-Cu64    | 74  | 11 | H4-C2-N4-Cu72     | 82  | 8   |
| H4-C2-N4-Cu80    | 90  | 1  | H4-C2-N4-Cu96    | 106 | 7  | H4-C2-N4-Cu120    | 130 | 1   |
| H4-C2-N4-O1      | 11  | 2  | H4-C2-N4-O8-Cu68 | 86  | 3  | H4-C2-N6          | 12  | 1   |
| H4-C2-N6-O1      | 13  | 2  | H4-C3            | 7   | 55 | H4-C3-Cu48        | 55  | 2   |
| H4-C3-O1         | 8   | 12 | H4-C3-O1-Cu48    | 56  | 5  | H4-C3-O1-Cu64     | 72  | 1   |
| H4-C3-O1-Cu72    | 80  | 3  | H4-C3-O1-Cu96    | 104 | 2  | H4-C3-O2          | 9   | 1   |
| H4-C3-O2-Cu36    | 45  | 3  | H4-C3-O2-Cu48    | 57  | 13 | H4-C3-O2-Cu64     | 73  | 11  |
| H4-C3-O2-Cu72    | 81  | 4  | H4-C3-O2-Cu96    | 105 | 3  | H4-C3-O3-Cu36     | 46  | 4   |
| H4-C3-O3-Cu48    | 58  | 24 | H4-C3-O3-Cu64    | 74  | 11 | H4-C3-O3-Cu72     | 82  | 9   |
| H4-C3-O3-Cu96    | 106 | 15 | H4-C3-O5-Cu36    | 48  | 44 | H4-C3-N2          | 9   | 165 |
| H4-C3-N2-Cu32    | 41  | 1  | H4-C3-N2-Cu34    | 43  | 2  | H4-C3-N2-Cu36     | 45  | 25  |
| H4-C3-N2-Cu48    | 57  | 15 | H4-C3-N2-Cu64    | 73  | 8  | H4-C3-N2-Cu72     | 81  | 15  |
| H4-C3-N2-Cu96    | 105 | 4  | H4-C3-N2-O1      | 10  | 18 | H4-C3-N2-O1-Cu36  | 46  | 7   |
| H4-C3-N2-O1-Cu48 | 58  | 45 | H4-C3-N2-O1-Cu60 | 70  | 2  | H4-C3-N2-O1-Cu64  | 74  | 38  |
| H4-C3-N2-O1-Cu72 | 82  | 13 | H4-C3-N2-O1-Cu96 | 106 | 24 | H4-C3-N2-O1-Cu120 | 130 | 1   |
| H4-C3-N2-O2      | 11  | 39 | H4-C3-N2-O3-Cu36 | 48  | 32 | H4-C3-N4-O1       | 12  | 8   |
| H4-C3-N4-O2      | 13  | 38 | H4-C3-N4-O3      | 14  | 9  | H4-C3-N6          | 13  | 10  |
| H4-C4-Cu36       | 44  | 3  | H4-C4-Cu48       | 56  | 1  | H4-C4-Cu64        | 72  | 2   |
| H4-C4-Cu72       | 80  | 2  | H4-C4-Cu96       | 104 | 3  | H4-C4-O1-Cu36     | 45  | 1   |
| H4-C4-O1-Cu48    | 57  | 12 | H4-C4-O1-Cu64    | 73  | 9  | H4-C4-O1-Cu72     | 81  | 9   |
| H4-C4-O1-Cu96    | 105 | 5  | H4-C4-O2         | 10  | 6  | H4-C4-O2-Cu36     | 46  | 4   |
| H4-C4-O2-Cu48    | 58  | 23 | H4-C4-O2-Cu60    | 70  | 2  | H4-C4-O2-Cu64     | 74  | 27  |
| H4-C4-O2-Cu72    | 82  | 13 | H4-C4-O2-Cu80    | 90  | 1  | H4-C4-O2-Cu96     | 106 | 21  |
| H4-C4-O3         | 11  | 2  | H4-C4-O4         | 12  | 5  | H4-C4-O5          | 13  | 1   |
| H4-C4-N2         | 10  | 10 | H4-C4-N2-Cu36    | 46  | 1  | H4-C4-N2-Cu48     | 58  | 18  |
| H4-C4-N2-Cu60    | 70  | 3  | H4-C4-N2-Cu64    | 74  | 11 | H4-C4-N2-Cu72     | 82  | 12  |
| H4-C4-N2-Cu80    | 90  | 2  | H4-C4-N2-Cu96    | 106 | 7  | H4-C4-N2-O1-Cu36  | 47  | 12  |
| H4-C4-N2-O3      | 13  | 7  | H4-C4-N2-O4      | 14  | 3  | H4-C4-N2-O5       | 15  | 4   |
| H4-C4-N4         | 12  | 2  | H4-C4-N4-O1      | 13  | 24 | H4-C4-N4-O2       | 14  | 4   |
| H4-C4-N4-O3      | 15  | 48 | H4-C4-N6-O1      | 15  | 3  | H4-C5-Cu36        | 45  | 1   |
| H4-C5-Cu48       | 57  | 3  | H4-C5-Cu60       | 69  | 1  | H4-C5-Cu64        | 73  | 1   |
| H4-C5-Cu72       | 81  | 1  | H4-C5-Cu80       | 89  | 1  | H4-C5-Cu96        | 105 | 4   |
| H4-C5-O1-Cu48    | 58  | 5  | H4-C5-O1-Cu60    | 70  | 3  | H4-C5-O1-Cu64     | 74  | 17  |
| H4-C5-O1-Cu72    | 82  | 5  | H4-C5-O1-Cu80    | 90  | 1  | H4-C5-O1-Cu96     | 106 | 14  |
| H4-C5-O1-Cu120   | 130 | 1  | H4-C5-O2         | 11  | 3  | H4-C5-O3          | 12  | 24  |
| H4-C5-O4         | 13  | 26 | H4-C5-N2-O1-Cu36 | 48  | 38 | H4-C5-N2-O2       | 13  | 1   |
| H4-C5-N4         | 13  | 8  | H4-C5-N4-O2      | 15  | 1  | H4-C5-N6-O4       | 19  | 1   |
| H4-C5-N8-O4      | 21  | 6  | H4-C5-N8-O5      | 22  | 18 | H4-C6-Cu36        | 46  | 1   |
| H4-C6-Cu48       | 58  | 3  | H4-C6-Cu60       | 70  | 2  | H4-C6-Cu64        | 74  | 4   |
| H4-C6-Cu72       | 82  | 4  | H4-C6-Cu96       | 106 | 7  | H4-C6-Cu120       | 130 | 1   |
| H4-C6-O1         | 11  | 7  | H4-C6-O2         | 12  | 24 | H4-C6-O3          | 13  | 48  |
| H4-C6-N2         | 12  | 2  | H4-C6-N2-O1      | 13  | 20 | H4-C6-N2-O2       | 14  | 1   |
| H4-C6-N2-O3      | 15  | 15 | H4-C6-N4-O6      | 20  | 1  | H4-C6-N4-O8       | 22  | 3   |
| H4-C6-N6-O4      | 20  | 3  | H4-C6-N6-O5      | 21  | 22 | H4-C6-N6-O6       | 22  | 57  |
| H4-C6-N8-O3      | 21  | 9  | H4-C6-N8-O4      | 22  | 28 | H4-C7             | 11  | 3   |
| H4-C7-O1         | 12  | 6  | H4-C7-O2         | 13  | 57 | H4-C7-N6-O4       | 21  | 12  |
| H4-C7-N8-O3      | 22  | 5  | H4-C8-O1         | 13  | 25 | H4-C8-N4-O5       | 21  | 3   |
| H4-C8-N4-O6      | 22  | 15 | H4-C8-N6-O3      | 21  | 6  | H4-C8-N6-O4       | 22  | 30  |
| H4-C9            | 13  | 1  | H4-C10-N4-O4     | 22  | 9  | H5-N1-Cu22        | 28  | 4   |
| H5-N1-O1         | 7   | 63 | H5-N2-Cu36       | 43  | 6  | H5-N3-O1-Cu36     | 45  | 1   |
| H5-N3-O1-Cu48    | 57  | 3  | H5-N3-O1-Cu64    | 73  | 1  | H5-N3-O1-Cu96     | 105 | 1   |
| H5-N3-O2-Cu48    | 58  | 1  | H5-N3-O2-Cu96    | 106 | 1  | H5-N5-Cu18        | 28  | 8   |
| H5-N5-Cu48       | 58  | 2  | H5-N5-Cu60       | 70  | 1  | H5-N5-Cu96        | 106 | 1   |
| H5-C1-O2-Cu23    | 31  | 10 | H5-C1-N1         | 7   | 70 | H5-C1-N1-Cu36     | 43  | 26  |
| H5-C1-N1-Cu72    | 79  | 1  | H5-C1-N1-O1-Cu48 | 56  | 2  | H5-C1-N1-O1-Cu72  | 80  | 2   |
| H5-C1-N1-O2-Cu36 | 45  | 5  | H5-C1-N1-O2-Cu48 | 57  | 2  | H5-C1-N1-O2-Cu72  | 81  | 1   |
| H5-C1-N1-O2-Cu96 | 105 | 1  | H5-C1-N1-O3      | 10  | 4  | H5-C1-N1-O3-Cu36  | 46  | 4   |
| H5-C1-N1-O3-Cu48 | 58  | 5  | H5-C1-N1-O4-Cu48 | 59  | 2  | H5-C1-N3-Cu36     | 45  | 1   |
| H5-C1-N3-Cu48    | 57  | 4  | H5-C1-N3-Cu64    | 73  | 2  | H5-C1-N3-Cu72     | 81  | 3   |
| H5-C1-N3-Cu96    | 105 | 1  | H5-C1-N3-O1-Cu36 | 46  | 2  | H5-C1-N3-O1-Cu48  | 58  | 4   |
| H5-C1-N3-O1-Cu64 | 74  | 2  | H5-C1-N3-O1-Cu72 | 82  | 1  | H5-C1-N3-O1-Cu96  | 106 | 4   |

|                   |     |     |                   |     |     |                   |     |     |
|-------------------|-----|-----|-------------------|-----|-----|-------------------|-----|-----|
| H5-C1-N3-O2-Cu36  | 47  | 1   | H5-C1-N3-O2-Cu48  | 59  | 7   | H5-C1-N3-O2-Cu64  | 75  | 8   |
| H5-C1-N3-O2-Cu72  | 83  | 1   | H5-C1-N3-O2-Cu96  | 107 | 6   | H5-C1-N5-Cu36     | 47  | 1   |
| H5-C1-N5-Cu48     | 59  | 6   | H5-C1-N5-Cu64     | 75  | 5   | H5-C1-N5-Cu72     | 83  | 2   |
| H5-C1-N5-Cu80     | 91  | 1   | H5-C1-N5-Cu96     | 107 | 3   | H5-C1-N5-Cu120    | 131 | 2   |
| H5-C2-N1          | 8   | 165 | H5-C2-N1-Cu48     | 56  | 2   | H5-C2-N1-Cu64     | 72  | 1   |
| H5-C2-N1-Cu72     | 80  | 2   | H5-C2-N1-Cu96     | 104 | 1   | H5-C2-N1-O1       | 9   | 184 |
| H5-C2-N1-O1-Cu48  | 57  | 14  | H5-C2-N1-O1-Cu64  | 73  | 3   | H5-C2-N1-O1-Cu72  | 81  | 7   |
| H5-C2-N1-O1-Cu96  | 105 | 6   | H5-C2-N1-O2       | 10  | 71  | H5-C2-N1-O2-Cu24  | 34  | 2   |
| H5-C2-N1-O2-Cu27  | 37  | 1   | H5-C2-N1-O2-Cu32  | 42  | 2   | H5-C2-N1-O2-Cu36  | 46  | 19  |
| H5-C2-N1-O2-Cu48  | 58  | 38  | H5-C2-N1-O2-Cu54  | 64  | 9   | H5-C2-N1-O2-Cu64  | 74  | 10  |
| H5-C2-N1-O2-Cu72  | 82  | 15  | H5-C2-N1-O2-Cu96  | 106 | 13  | H5-C2-N1-O2-Cu144 | 154 | 7   |
| H5-C2-N1-O3       | 11  | 54  | H5-C2-N1-O3-Cu36  | 47  | 1   | H5-C2-N1-O3-Cu48  | 59  | 17  |
| H5-C2-N1-O3-Cu64  | 75  | 20  | H5-C2-N1-O3-Cu72  | 83  | 7   | H5-C2-N1-O3-Cu96  | 107 | 7   |
| H5-C2-N3-Cu48     | 58  | 15  | H5-C2-N3-Cu64     | 74  | 8   | H5-C2-N3-Cu72     | 82  | 4   |
| H5-C2-N3-Cu96     | 106 | 9   | H5-C2-N3-O1       | 11  | 1   | H5-C2-N3-O1-Cu36  | 47  | 6   |
| H5-C2-N3-O1-Cu48  | 59  | 25  | H5-C2-N3-O1-Cu64  | 75  | 20  | H5-C2-N3-O1-Cu72  | 83  | 5   |
| H5-C2-N3-O1-Cu96  | 107 | 12  | H5-C2-N3-O1-Cu120 | 131 | 1   | H5-C2-N5-O1       | 13  | 1   |
| H5-C2-N7          | 14  | 3   | H5-C3-N1-Cu36     | 45  | 2   | H5-C3-N1-Cu48     | 57  | 7   |
| H5-C3-N1-Cu64     | 73  | 6   | H5-C3-N1-Cu72     | 81  | 5   | H5-C3-N1-Cu96     | 105 | 2   |
| H5-C3-N1-O1       | 10  | 46  | H5-C3-N1-O1-Cu36  | 46  | 5   | H5-C3-N1-O1-Cu48  | 58  | 35  |
| H5-C3-N1-O1-Cu64  | 74  | 25  | H5-C3-N1-O1-Cu72  | 82  | 26  | H5-C3-N1-O1-Cu96  | 106 | 19  |
| H5-C3-N1-O2       | 11  | 4   | H5-C3-N1-O2-Cu36  | 47  | 8   | H5-C3-N1-O2-Cu48  | 59  | 52  |
| H5-C3-N1-O2-Cu60  | 71  | 1   | H5-C3-N1-O2-Cu64  | 75  | 60  | H5-C3-N1-O2-Cu72  | 83  | 19  |
| H5-C3-N1-O2-Cu80  | 91  | 1   | H5-C3-N1-O2-Cu96  | 107 | 45  | H5-C3-N1-O3       | 12  | 8   |
| H5-C3-N1-O3-Cu27  | 39  | 19  | H5-C3-N1-O3-Cu36  | 48  | 115 | H5-C3-N1-O3-Cu48  | 60  | 65  |
| H5-C3-N1-O3-Cu54  | 66  | 239 | H5-C3-N1-O3-Cu72  | 84  | 45  | H5-C3-N1-O3-Cu144 | 156 | 11  |
| H5-C3-N1-O3-Cu162 | 174 | 2   | H5-C3-N3          | 11  | 1   | H5-C3-N3-Cu36     | 47  | 1   |
| H5-C3-N3-Cu48     | 59  | 28  | H5-C3-N3-Cu60     | 71  | 5   | H5-C3-N3-Cu64     | 75  | 21  |
| H5-C3-N3-Cu72     | 83  | 15  | H5-C3-N3-Cu80     | 91  | 3   | H5-C3-N3-Cu96     | 107 | 19  |
| H5-C3-N3-Cu120    | 131 | 2   | H5-C3-N3-O1       | 12  | 4   | H5-C3-N3-O2       | 13  | 5   |
| H5-C3-N3-O9-Cu34  | 54  | 1   | H5-C3-N3-O9-Cu36  | 56  | 88  | H5-C3-N5          | 13  | 7   |
| H5-C3-N5-O1       | 14  | 31  | H5-C3-N5-O2       | 15  | 4   | H5-C4-N1          | 10  | 9   |
| H5-C4-N1-Cu36     | 46  | 4   | H5-C4-N1-Cu48     | 58  | 14  | H5-C4-N1-Cu60     | 70  | 1   |
| H5-C4-N1-Cu64     | 74  | 9   | H5-C4-N1-Cu72     | 82  | 7   | H5-C4-N1-Cu96     | 106 | 15  |
| H5-C4-N1-O1       | 11  | 2   | H5-C4-N1-O1-Cu36  | 47  | 5   | H5-C4-N1-O1-Cu48  | 59  | 45  |
| H5-C4-N1-O1-Cu60  | 71  | 6   | H5-C4-N1-O1-Cu64  | 75  | 72  | H5-C4-N1-O1-Cu72  | 83  | 12  |
| H5-C4-N1-O1-Cu80  | 91  | 1   | H5-C4-N1-O1-Cu96  | 107 | 52  | H5-C4-N1-O1-Cu120 | 131 | 3   |
| H5-C4-N1-O2       | 12  | 28  | H5-C4-N1-O3       | 13  | 2   | H5-C4-N1-O4-Cu36  | 50  | 68  |
| H5-C4-N1-O4-Cu48  | 62  | 81  | H5-C4-N1-O4-Cu54  | 68  | 305 | H5-C4-N1-O4-Cu72  | 86  | 47  |
| H5-C4-N1-O4-Cu144 | 158 | 13  | H5-C4-N1-O4-Cu162 | 176 | 2   | H5-C4-N1-O6       | 16  | 10  |
| H5-C4-N3          | 12  | 1   | H5-C4-N3-O1       | 13  | 8   | H5-C4-N3-O2       | 14  | 12  |
| H5-C4-N3-O3       | 15  | 26  | H5-C4-N3-O4       | 16  | 8   | H5-C4-N5          | 14  | 28  |
| H5-C4-N5-O2       | 16  | 22  | H5-C5-N1          | 11  | 15  | H5-C5-N1-Cu30     | 41  | 1   |
| H5-C5-N1-Cu36     | 47  | 23  | H5-C5-N1-Cu48     | 59  | 7   | H5-C5-N1-Cu60     | 71  | 6   |
| H5-C5-N1-Cu64     | 75  | 18  | H5-C5-N1-Cu72     | 83  | 4   | H5-C5-N1-Cu80     | 91  | 2   |
| H5-C5-N1-Cu96     | 107 | 14  | H5-C5-N1-Cu120    | 131 | 3   | H5-C5-N1-O1       | 12  | 28  |
| H5-C5-N1-O2       | 13  | 1   | H5-C5-N1-O3       | 14  | 5   | H5-C5-N3          | 13  | 5   |
| H5-C5-N3-O1       | 14  | 17  | H5-C5-N3-O2       | 15  | 2   | H5-C5-N3-O3       | 16  | 28  |
| H5-C5-N5          | 15  | 1   | H5-C5-N5-O1       | 16  | 6   | H5-C5-N9-O1       | 20  | 1   |
| H5-C5-N9-O3       | 22  | 6   | H5-C5-N9-O4       | 23  | 5   | H5-C6-N1-O1       | 13  | 1   |
| H5-C6-N1-O2       | 14  | 3   | H5-C6-N3          | 14  | 6   | H5-C6-N3-O2       | 16  | 2   |
| H5-C6-N5-O7       | 23  | 25  | H5-C6-N7-O3       | 21  | 1   | H5-C6-N7-O4       | 22  | 9   |
| H5-C6-N7-O5       | 23  | 67  | H5-C6-N9-O2       | 22  | 9   | H5-C7-N1          | 13  | 2   |
| H5-C7-N1-O1       | 14  | 1   | H5-C7-N1-O3       | 16  | 9   | H5-C7-N1-O5-Cu35  | 53  | 1   |
| H5-C7-N1-O5-Cu36  | 54  | 29  | H5-C7-N3-O1       | 16  | 3   | H5-C7-N5-O5       | 22  | 15  |
| H5-C7-N5-O6       | 23  | 23  | H5-C7-N7-O3       | 22  | 22  | H5-C7-N7-O4       | 23  | 23  |
| H5-C8-N1-O2       | 16  | 11  | H5-C8-N5-O4       | 22  | 7   | H5-C8-N5-O5       | 23  | 44  |
| H5-C9-N3-O6       | 23  | 6   | H5-C9-N5-O3       | 22  | 5   | H5-C9-N5-O4       | 23  | 28  |
| H6-O3             | 9   | 10  | H6-N2-Cu36        | 44  | 16  | H6-N3-Cu32        | 41  | 5   |
| H6-N4-Cu96        | 106 | 1   | H6-N4-O1-Cu72     | 83  | 1   | H6-N4-O2-Cu48     | 60  | 1   |
| H6-N6-Cu48        | 60  | 2   | H6-N6-Cu120       | 132 | 1   | H6-C1-O1-Cu27     | 35  | 570 |

|                   |     |      |                   |     |      |                   |     |     |
|-------------------|-----|------|-------------------|-----|------|-------------------|-----|-----|
| H6-C1-O2-Cu27     | 36  | 3245 | H6-C1-O3-Cu12     | 22  | 2636 | H6-C1-N2-Cu48     | 57  | 2   |
| H6-C1-N2-O1-Cu36  | 46  | 1    | H6-C1-N2-O1-Cu48  | 58  | 4    | H6-C1-N2-O1-Cu72  | 82  | 2   |
| H6-C1-N2-O1-Cu96  | 106 | 2    | H6-C1-N2-O2-Cu36  | 47  | 2    | H6-C1-N2-O2-Cu48  | 59  | 8   |
| H6-C1-N2-O2-Cu64  | 75  | 5    | H6-C1-N2-O2-Cu72  | 83  | 2    | H6-C1-N2-O2-Cu96  | 107 | 4   |
| H6-C1-N2-O3-Cu48  | 60  | 1    | H6-C1-N2-O3-Cu64  | 76  | 2    | H6-C1-N2-O3-Cu96  | 108 | 2   |
| H6-C1-N4-Cu48     | 59  | 2    | H6-C1-N4-Cu60     | 71  | 1    | H6-C1-N4-Cu64     | 75  | 4   |
| H6-C1-N4-Cu72     | 83  | 3    | H6-C1-N4-Cu96     | 107 | 5    | H6-C1-N4-O1-Cu48  | 60  | 3   |
| H6-C1-N4-O1-Cu64  | 76  | 4    | H6-C1-N4-O1-Cu72  | 84  | 2    | H6-C1-N4-O1-Cu96  | 108 | 1   |
| H6-C2             | 8   | 304  | H6-C2-O1          | 9   | 61   | H6-C2-O2-Cu48     | 58  | 2   |
| H6-C2-O2-Cu72     | 82  | 1    | H6-C2-O3-Cu36     | 47  | 2548 | H6-C2-O3-Cu48     | 59  | 7   |
| H6-C2-O3-Cu64     | 75  | 2    | H6-C2-O3-Cu72     | 83  | 1    | H6-C2-O3-Cu80     | 91  | 1   |
| H6-C2-O3-Cu96     | 107 | 2    | H6-C2-O4-Cu48     | 60  | 1    | H6-C2-O4-Cu64     | 76  | 3   |
| H6-C2-O4-Cu72     | 84  | 3    | H6-C2-O4-Cu96     | 108 | 3    | H6-C2-N2-Cu36     | 46  | 2   |
| H6-C2-N2-Cu48     | 58  | 11   | H6-C2-N2-Cu64     | 74  | 6    | H6-C2-N2-Cu72     | 82  | 5   |
| H6-C2-N2-Cu96     | 106 | 4    | H6-C2-N2-O1-Cu32  | 43  | 2    | H6-C2-N2-O1-Cu34  | 45  | 8   |
| H6-C2-N2-O1-Cu36  | 47  | 56   | H6-C2-N2-O1-Cu48  | 59  | 18   | H6-C2-N2-O1-Cu60  | 71  | 2   |
| H6-C2-N2-O1-Cu64  | 75  | 21   | H6-C2-N2-O1-Cu72  | 83  | 6    | H6-C2-N2-O1-Cu96  | 107 | 16  |
| H6-C2-N2-O2-Cu36  | 48  | 133  | H6-C2-N2-O2-Cu48  | 60  | 26   | H6-C2-N2-O2-Cu60  | 72  | 1   |
| H6-C2-N2-O2-Cu64  | 76  | 37   | H6-C2-N2-O2-Cu72  | 84  | 10   | H6-C2-N2-O2-Cu80  | 92  | 1   |
| H6-C2-N2-O2-Cu96  | 108 | 28   | H6-C2-N2-O2-Cu120 | 132 | 2    | H6-C2-N2-O4-Cu66  | 80  | 2   |
| H6-C2-N4-Cu48     | 60  | 17   | H6-C2-N4-Cu60     | 72  | 3    | H6-C2-N4-Cu64     | 76  | 25  |
| H6-C2-N4-Cu72     | 84  | 9    | H6-C2-N4-Cu80     | 92  | 3    | H6-C2-N4-Cu96     | 108 | 16  |
| H6-C2-N4-Cu120    | 132 | 8    | H6-C3             | 9   | 94   | H6-C3-Cu36        | 45  | 1   |
| H6-C3-Cu48        | 57  | 1    | H6-C3-Cu72        | 81  | 2    | H6-C3-O1          | 10  | 2   |
| H6-C3-O1-Cu36     | 46  | 1    | H6-C3-O1-Cu48     | 58  | 45   | H6-C3-O1-Cu64     | 74  | 723 |
| H6-C3-O1-Cu72     | 82  | 1    | H6-C3-O1-Cu96     | 106 | 3    | H6-C3-O2          | 11  | 60  |
| H6-C3-O2-Cu36     | 47  | 2    | H6-C3-O2-Cu48     | 59  | 25   | H6-C3-O2-Cu64     | 75  | 14  |
| H6-C3-O2-Cu72     | 83  | 5    | H6-C3-O2-Cu80     | 91  | 1    | H6-C3-O2-Cu96     | 107 | 13  |
| H6-C3-O3-Cu48     | 60  | 28   | H6-C3-O3-Cu64     | 76  | 28   | H6-C3-O3-Cu72     | 84  | 6   |
| H6-C3-O3-Cu96     | 108 | 26   | H6-C3-N1-O2-Cu27  | 39  | 77   | H6-C3-N1-O2-Cu36  | 48  | 70  |
| H6-C3-N1-O2-Cu48  | 60  | 51   | H6-C3-N1-O2-Cu54  | 66  | 186  | H6-C3-N1-O2-Cu72  | 84  | 15  |
| H6-C3-N1-O2-Cu144 | 156 | 11   | H6-C3-N1-O2-Cu162 | 174 | 2    | H6-C3-N1-O3-Cu36  | 49  | 27  |
| H6-C3-N1-O3-Cu48  | 61  | 20   | H6-C3-N1-O3-Cu54  | 67  | 20   | H6-C3-N1-O3-Cu72  | 85  | 11  |
| H6-C3-N1-O3-Cu96  | 109 | 2    | H6-C3-N1-O3-Cu144 | 157 | 21   | H6-C3-N2-Cu32     | 43  | 3   |
| H6-C3-N2-Cu33     | 44  | 1    | H6-C3-N2-Cu36     | 47  | 97   | H6-C3-N2-Cu48     | 59  | 21  |
| H6-C3-N2-Cu60     | 71  | 1    | H6-C3-N2-Cu64     | 75  | 23   | H6-C3-N2-Cu72     | 83  | 9   |
| H6-C3-N2-Cu80     | 91  | 1    | H6-C3-N2-Cu96     | 107 | 26   | H6-C3-N2-O1-Cu32  | 44  | 2   |
| H6-C3-N2-O1-Cu36  | 48  | 71   | H6-C3-N2-O1-Cu48  | 60  | 50   | H6-C3-N2-O1-Cu60  | 72  | 2   |
| H6-C3-N2-O1-Cu64  | 76  | 92   | H6-C3-N2-O1-Cu72  | 84  | 27   | H6-C3-N2-O1-Cu80  | 92  | 2   |
| H6-C3-N2-O1-Cu96  | 108 | 67   | H6-C3-N2-O1-Cu120 | 132 | 7    | H6-C3-N4          | 13  | 3   |
| H6-C3-N4-O1       | 14  | 9    | H6-C3-N6          | 15  | 12   | H6-C3-N6-O6       | 21  | 1   |
| H6-C4-Cu48        | 58  | 3    | H6-C4-Cu64        | 74  | 3    | H6-C4-Cu72        | 82  | 2   |
| H6-C4-Cu96        | 106 | 3    | H6-C4-O1-Cu36     | 47  | 4    | H6-C4-O1-Cu48     | 59  | 17  |
| H6-C4-O1-Cu64     | 75  | 100  | H6-C4-O1-Cu72     | 83  | 9    | H6-C4-O1-Cu96     | 107 | 16  |
| H6-C4-O2          | 12  | 1    | H6-C4-O2-Cu36     | 48  | 3    | H6-C4-O2-Cu48     | 60  | 47  |
| H6-C4-O2-Cu60     | 72  | 6    | H6-C4-O2-Cu64     | 76  | 275  | H6-C4-O2-Cu72     | 84  | 11  |
| H6-C4-O2-Cu80     | 92  | 6    | H6-C4-O2-Cu96     | 108 | 49   | H6-C4-O2-Cu120    | 132 | 4   |
| H6-C4-O3          | 13  | 5    | H6-C4-O4          | 14  | 3    | H6-C4-N1-O4-Cu36  | 51  | 41  |
| H6-C4-N1-O4-Cu48  | 63  | 48   | H6-C4-N1-O4-Cu54  | 69  | 40   | H6-C4-N1-O4-Cu64  | 79  | 8   |
| H6-C4-N1-O4-Cu72  | 87  | 32   | H6-C4-N1-O4-Cu96  | 111 | 1    | H6-C4-N1-O4-Cu144 | 159 | 34  |
| H6-C4-N1-O4-Cu162 | 177 | 5    | H6-C4-N2-Cu31     | 43  | 2    | H6-C4-N2-Cu36     | 48  | 71  |
| H6-C4-N2-Cu48     | 60  | 31   | H6-C4-N2-Cu60     | 72  | 3    | H6-C4-N2-Cu64     | 76  | 75  |
| H6-C4-N2-Cu72     | 84  | 25   | H6-C4-N2-Cu80     | 92  | 7    | H6-C4-N2-Cu96     | 108 | 58  |
| H6-C4-N2-Cu120    | 132 | 5    | H6-C4-N2-O1       | 13  | 1    | H6-C4-N2-O3       | 15  | 1   |
| H6-C4-N2-O4       | 16  | 3    | H6-C4-N4          | 14  | 7    | H6-C4-N4-O2       | 16  | 36  |
| H6-C4-N4-O3       | 17  | 41   | H6-C5-Cu36        | 47  | 1    | H6-C5-Cu48        | 59  | 8   |
| H6-C5-Cu60        | 71  | 1    | H6-C5-Cu64        | 75  | 11   | H6-C5-Cu80        | 91  | 2   |
| H6-C5-Cu96        | 107 | 12   | H6-C5-O1-Cu36     | 48  | 1    | H6-C5-O1-Cu48     | 60  | 15  |
| H6-C5-O1-Cu60     | 72  | 8    | H6-C5-O1-Cu64     | 76  | 50   | H6-C5-O1-Cu72     | 84  | 8   |
| H6-C5-O1-Cu80     | 92  | 7    | H6-C5-O1-Cu96     | 108 | 41   | H6-C5-O1-Cu120    | 132 | 4   |
| H6-C5-O2          | 13  | 18   | H6-C5-O3          | 14  | 44   | H6-C5-O4          | 15  | 52  |

|                   |     |     |                   |     |     |                   |     |    |
|-------------------|-----|-----|-------------------|-----|-----|-------------------|-----|----|
| H6-C5-N2-O1       | 14  | 16  | H6-C5-N2-O2       | 15  | 9   | H6-C5-N2-O4       | 17  | 6  |
| H6-C5-N4          | 15  | 41  | H6-C5-N4-O2       | 17  | 17  | H6-C5-N10-O2      | 23  | 3  |
| H6-C6             | 12  | 83  | H6-C6-Cu36        | 48  | 3   | H6-C6-Cu48        | 60  | 12 |
| H6-C6-Cu60        | 72  | 4   | H6-C6-Cu64        | 76  | 23  | H6-C6-Cu72        | 84  | 11 |
| H6-C6-Cu80        | 92  | 7   | H6-C6-Cu96        | 108 | 25  | H6-C6-Cu120       | 132 | 3  |
| H6-C6-O1          | 13  | 439 | H6-C6-O2          | 14  | 78  | H6-C6-O3          | 15  | 30 |
| H6-C6-N2          | 14  | 2   | H6-C6-N2-O1       | 15  | 25  | H6-C6-N2-O2       | 16  | 7  |
| H6-C6-N2-O3       | 17  | 1   | H6-C6-N2-O4       | 18  | 48  | H6-C6-N4-O1       | 17  | 26 |
| H6-C6-N6-O5       | 23  | 8   | H6-C6-N6-O6       | 24  | 48  | H6-C6-N8-O3       | 23  | 12 |
| H6-C6-N8-O4       | 24  | 46  | H6-C6-N10-O1      | 23  | 5   | H6-C6-N10-O2      | 24  | 4  |
| H6-C7-O1          | 14  | 8   | H6-C7-O2          | 15  | 19  | H6-C7-O4          | 17  | 3  |
| H6-C7-N2          | 15  | 7   | H6-C7-N2-O2       | 17  | 18  | H6-C7-N4-O7       | 24  | 4  |
| H6-C7-N6-O4       | 23  | 56  | H6-C7-N6-O5       | 24  | 155 | H6-C7-N8-O2       | 23  | 5  |
| H6-C7-N8-O3       | 24  | 14  | H6-C8             | 14  | 3   | H6-C8-O1          | 15  | 7  |
| H6-C8-N2-O1       | 17  | 16  | H6-C8-N2-O2       | 18  | 3   | H6-C8-N4-O4       | 22  | 4  |
| H6-C8-N4-O5       | 23  | 6   | H6-C8-N4-O6       | 24  | 15  | H6-C8-N6-O4       | 24  | 45 |
| H6-C9             | 15  | 2   | H6-C9-N2-O7       | 24  | 4   | H6-C9-N4-O4       | 23  | 14 |
| H6-C9-N4-O5       | 24  | 79  | H6-C9-N6-O2       | 23  | 11  | H6-C9-N6-O3       | 24  | 57 |
| H6-C10-N2-O2      | 20  | 3   | H6-C10-N4-O4      | 24  | 6   | H6-C10-N6-O2      | 24  | 6  |
| H6-C11-N2-O5      | 24  | 6   | H6-C11-N4-O3      | 24  | 13  | H7-N2-Cu35        | 44  | 4  |
| H7-N2-Cu36        | 45  | 21  | H7-N5-O1-Cu36     | 49  | 1   | H7-N5-O1-Cu96     | 109 | 1  |
| H7-N5-O1-Cu120    | 133 | 1   | H7-C1-N3-Cu48     | 59  | 2   | H7-C1-N3-Cu96     | 107 | 1  |
| H7-C1-N3-O1-Cu96  | 108 | 3   | H7-C1-N5-Cu48     | 61  | 1   | H7-C1-N5-Cu72     | 85  | 1  |
| H7-C1-N5-Cu80     | 93  | 1   | H7-C1-N5-Cu96     | 109 | 2   | H7-C1-N5-Cu120    | 133 | 1  |
| H7-C2-N1-Cu36     | 46  | 2   | H7-C2-N1-Cu48     | 58  | 2   | H7-C2-N1-Cu64     | 74  | 1  |
| H7-C2-N1-O1       | 11  | 12  | H7-C2-N1-O1-Cu36  | 47  | 2   | H7-C2-N1-O1-Cu48  | 59  | 9  |
| H7-C2-N1-O1-Cu64  | 75  | 1   | H7-C2-N1-O1-Cu96  | 107 | 1   | H7-C2-N1-O2       | 12  | 3  |
| H7-C2-N1-O2-Cu36  | 48  | 2   | H7-C2-N1-O2-Cu48  | 60  | 16  | H7-C2-N1-O2-Cu64  | 76  | 8  |
| H7-C2-N1-O2-Cu72  | 84  | 5   | H7-C2-N1-O2-Cu96  | 108 | 8   | H7-C2-N1-O3-Cu36  | 49  | 3  |
| H7-C2-N1-O3-Cu48  | 61  | 9   | H7-C2-N1-O3-Cu64  | 77  | 7   | H7-C2-N1-O3-Cu72  | 85  | 1  |
| H7-C2-N1-O3-Cu96  | 109 | 10  | H7-C2-N1-O3-Cu120 | 133 | 1   | H7-C2-N3-Cu36     | 48  | 1  |
| H7-C2-N3-Cu48     | 60  | 5   | H7-C2-N3-Cu64     | 76  | 14  | H7-C2-N3-Cu72     | 84  | 5  |
| H7-C2-N3-Cu80     | 92  | 1   | H7-C2-N3-Cu96     | 108 | 13  | H7-C2-N3-Cu120    | 132 | 2  |
| H7-C2-N3-O1-Cu36  | 49  | 1   | H7-C2-N3-O1-Cu48  | 61  | 9   | H7-C2-N3-O1-Cu60  | 73  | 2  |
| H7-C2-N3-O1-Cu64  | 77  | 20  | H7-C2-N3-O1-Cu72  | 85  | 10  | H7-C2-N3-O1-Cu80  | 93  | 2  |
| H7-C2-N3-O1-Cu96  | 109 | 12  | H7-C2-N3-O1-Cu120 | 133 | 1   | H7-C3-N1          | 11  | 22 |
| H7-C3-N1-Cu48     | 59  | 4   | H7-C3-N1-Cu64     | 75  | 7   | H7-C3-N1-Cu72     | 83  | 1  |
| H7-C3-N1-Cu96     | 107 | 3   | H7-C3-N1-O1-Cu36  | 48  | 4   | H7-C3-N1-O1-Cu48  | 60  | 24 |
| H7-C3-N1-O1-Cu60  | 72  | 1   | H7-C3-N1-O1-Cu64  | 76  | 46  | H7-C3-N1-O1-Cu72  | 84  | 15 |
| H7-C3-N1-O1-Cu96  | 108 | 31  | H7-C3-N1-O1-Cu120 | 132 | 1   | H7-C3-N1-O2       | 13  | 38 |
| H7-C3-N1-O2-Cu27  | 40  | 2   | H7-C3-N1-O2-Cu32  | 45  | 2   | H7-C3-N1-O2-Cu36  | 49  | 49 |
| H7-C3-N1-O2-Cu48  | 61  | 83  | H7-C3-N1-O2-Cu54  | 67  | 18  | H7-C3-N1-O2-Cu60  | 73  | 2  |
| H7-C3-N1-O2-Cu64  | 77  | 56  | H7-C3-N1-O2-Cu72  | 85  | 27  | H7-C3-N1-O2-Cu80  | 93  | 3  |
| H7-C3-N1-O2-Cu96  | 109 | 54  | H7-C3-N1-O2-Cu120 | 133 | 2   | H7-C3-N1-O2-Cu144 | 157 | 12 |
| H7-C3-N1-O2-Cu162 | 175 | 2   | H7-C3-N1-O3       | 14  | 33  | H7-C3-N1-O3-Cu36  | 50  | 21 |
| H7-C3-N1-O3-Cu48  | 62  | 20  | H7-C3-N1-O3-Cu54  | 68  | 20  | H7-C3-N1-O3-Cu64  | 78  | 3  |
| H7-C3-N1-O3-Cu72  | 86  | 13  | H7-C3-N1-O3-Cu96  | 110 | 3   | H7-C3-N1-O3-Cu144 | 158 | 15 |
| H7-C3-N3-Cu48     | 61  | 24  | H7-C3-N3-Cu60     | 73  | 6   | H7-C3-N3-Cu64     | 77  | 59 |
| H7-C3-N3-Cu72     | 85  | 16  | H7-C3-N3-Cu80     | 93  | 13  | H7-C3-N3-Cu96     | 109 | 46 |
| H7-C3-N3-Cu120    | 133 | 8   | H7-C3-N3-O2       | 15  | 1   | H7-C3-N5          | 15  | 5  |
| H7-C3-N5-O1       | 16  | 2   | H7-C4-N1          | 12  | 13  | H7-C4-N1-Cu36     | 48  | 1  |
| H7-C4-N1-Cu48     | 60  | 15  | H7-C4-N1-Cu64     | 76  | 28  | H7-C4-N1-Cu72     | 84  | 6  |
| H7-C4-N1-Cu80     | 92  | 3   | H7-C4-N1-Cu96     | 108 | 18  | H7-C4-N1-Cu120    | 132 | 4  |
| H7-C4-N1-O1-Cu36  | 49  | 4   | H7-C4-N1-O1-Cu48  | 61  | 56  | H7-C4-N1-O1-Cu60  | 73  | 9  |
| H7-C4-N1-O1-Cu64  | 77  | 145 | H7-C4-N1-O1-Cu72  | 85  | 24  | H7-C4-N1-O1-Cu80  | 93  | 16 |
| H7-C4-N1-O1-Cu96  | 109 | 106 | H7-C4-N1-O1-Cu120 | 133 | 15  | H7-C4-N1-O2       | 14  | 11 |
| H7-C4-N1-O3-Cu27  | 42  | 28  | H7-C4-N1-O3-Cu36  | 51  | 65  | H7-C4-N1-O3-Cu48  | 63  | 57 |
| H7-C4-N1-O3-Cu54  | 69  | 118 | H7-C4-N1-O3-Cu64  | 79  | 8   | H7-C4-N1-O3-Cu72  | 87  | 25 |
| H7-C4-N1-O3-Cu96  | 111 | 5   | H7-C4-N1-O3-Cu144 | 159 | 20  | H7-C4-N1-O3-Cu162 | 177 | 3  |
| H7-C4-N1-O4       | 16  | 35  | H7-C4-N1-O4-Cu36  | 52  | 17  | H7-C4-N1-O4-Cu48  | 64  | 24 |
| H7-C4-N1-O4-Cu54  | 70  | 20  | H7-C4-N1-O4-Cu64  | 80  | 7   | H7-C4-N1-O4-Cu72  | 88  | 7  |

|                   |     |    |                   |     |     |                   |     |     |
|-------------------|-----|----|-------------------|-----|-----|-------------------|-----|-----|
| H7-C4-N1-O4-Cu96  | 112 | 5  | H7-C4-N1-O4-Cu144 | 160 | 15  | H7-C4-N1-O4-Cu162 | 178 | 2   |
| H7-C4-N2-O3-Cu36  | 52  | 27 | H7-C4-N2-O3-Cu48  | 64  | 95  | H7-C4-N2-O3-Cu54  | 70  | 285 |
| H7-C4-N2-O3-Cu64  | 80  | 6  | H7-C4-N2-O3-Cu72  | 88  | 49  | H7-C4-N2-O3-Cu96  | 112 | 5   |
| H7-C4-N2-O3-Cu144 | 160 | 20 | H7-C4-N3          | 14  | 2   | H7-C4-N3-O1       | 15  | 13  |
| H7-C4-N3-O2       | 16  | 6  | H7-C4-N3-O3       | 17  | 11  | H7-C4-N5          | 16  | 28  |
| H7-C4-N5-O1       | 17  | 3  | H7-C4-N5-O2       | 18  | 5   | H7-C5-N1          | 13  | 1   |
| H7-C5-N1-Cu36     | 49  | 2  | H7-C5-N1-Cu48     | 61  | 30  | H7-C5-N1-Cu60     | 73  | 8   |
| H7-C5-N1-Cu64     | 77  | 91 | H7-C5-N1-Cu72     | 85  | 17  | H7-C5-N1-Cu80     | 93  | 10  |
| H7-C5-N1-Cu96     | 109 | 49 | H7-C5-N1-Cu120    | 133 | 9   | H7-C5-N1-O1       | 14  | 1   |
| H7-C5-N1-O2       | 15  | 4  | H7-C5-N1-O3       | 16  | 16  | H7-C5-N1-O4-Cu36  | 53  | 25  |
| H7-C5-N1-O4-Cu48  | 65  | 75 | H7-C5-N1-O4-Cu54  | 71  | 345 | H7-C5-N1-O4-Cu64  | 81  | 32  |
| H7-C5-N1-O4-Cu72  | 89  | 49 | H7-C5-N1-O4-Cu96  | 113 | 2   | H7-C5-N1-O4-Cu144 | 161 | 13  |
| H7-C5-N1-O4-Cu162 | 179 | 1  | H7-C5-N3          | 15  | 6   | H7-C5-N3-O1       | 16  | 24  |
| H7-C5-N3-O1-Cu31  | 47  | 1  | H7-C5-N3-O1-Cu36  | 52  | 32  | H7-C5-N3-O2       | 17  | 2   |
| H7-C5-N3-O3       | 18  | 7  | H7-C5-N5-O1       | 18  | 12  | H7-C5-N9-O2       | 23  | 6   |
| H7-C6-N1          | 14  | 2  | H7-C6-N1-O1       | 15  | 17  | H7-C6-N1-O2       | 16  | 33  |
| H7-C6-N1-O3       | 17  | 1  | H7-C6-N3          | 16  | 25  | H7-C6-N3-O2       | 18  | 44  |
| H7-C6-N5-O5       | 23  | 3  | H7-C6-N7-O4       | 24  | 9   | H7-C6-N7-O5       | 25  | 51  |
| H7-C6-N9-O2       | 24  | 10 | H7-C7-N1          | 15  | 1   | H7-C7-N1-O1       | 16  | 24  |
| H7-C7-N1-O3       | 18  | 7  | H7-C7-N3-O1       | 18  | 4   | H7-C7-N5-O4       | 23  | 12  |
| H7-C7-N5-O5       | 24  | 19 | H7-C7-N5-O6       | 25  | 37  | H7-C7-N7-O3       | 24  | 20  |
| H7-C7-N7-O4       | 25  | 76 | H7-C7-N9-O1       | 24  | 5   | H7-C7-N9-O2       | 25  | 8   |
| H7-C8-N1          | 16  | 7  | H7-C8-N1-O2       | 18  | 23  | H7-C8-N3          | 18  | 33  |
| H7-C8-N3-O1       | 19  | 1  | H7-C8-N5-O3       | 23  | 1   | H7-C8-N5-O4       | 24  | 42  |
| H7-C8-N5-O5       | 25  | 86 | H7-C8-N7-O2       | 24  | 28  | H7-C8-N7-O3       | 25  | 75  |
| H7-C9-N1-O2       | 19  | 5  | H7-C9-N3-O5       | 24  | 1   | H7-C9-N3-O6       | 25  | 19  |
| H7-C9-N5-O2       | 23  | 8  | H7-C9-N5-O3       | 24  | 11  | H7-C9-N5-O4       | 25  | 38  |
| H7-C9-N7-O2       | 25  | 5  | H7-C10-N3-O5      | 25  | 40  | H7-C10-N5-O2      | 24  | 6   |
| H7-C10-N5-O3      | 25  | 49 | H7-C11-N1-O5      | 24  | 2   | H7-C11-N3-O4      | 25  | 8   |
| H7-C12-N3-O3      | 25  | 7  | H8-N2-Cu35        | 45  | 3   | H8-N6-Cu48        | 62  | 2   |
| H8-C1-O2-Cu27     | 38  | 20 | H8-C1-N2-Cu36     | 47  | 1   | H8-C1-N4-Cu48     | 61  | 2   |
| H8-C1-N4-Cu64     | 77  | 2  | H8-C1-N4-Cu72     | 85  | 2   | H8-C1-N4-O1-Cu64  | 78  | 1   |
| H8-C1-N4-O1-Cu96  | 110 | 1  | H8-C2             | 10  | 1   | H8-C2-O2          | 12  | 7   |
| H8-C2-O2-Cu23     | 35  | 42 | H8-C2-O2-Cu24     | 36  | 98  | H8-C2-O3          | 13  | 6   |
| H8-C2-N2-Cu48     | 60  | 1  | H8-C2-N2-Cu96     | 108 | 2   | H8-C2-N2-O1-Cu48  | 61  | 9   |
| H8-C2-N2-O1-Cu64  | 77  | 14 | H8-C2-N2-O1-Cu72  | 85  | 6   | H8-C2-N2-O1-Cu96  | 109 | 7   |
| H8-C2-N2-O2-Cu48  | 62  | 6  | H8-C2-N2-O2-Cu64  | 78  | 15  | H8-C2-N2-O2-Cu72  | 86  | 6   |
| H8-C2-N2-O2-Cu80  | 94  | 1  | H8-C2-N2-O2-Cu96  | 110 | 12  | H8-C2-N2-O2-Cu120 | 134 | 1   |
| H8-C2-N4-Cu48     | 62  | 4  | H8-C2-N4-Cu60     | 74  | 3   | H8-C2-N4-Cu64     | 78  | 16  |
| H8-C2-N4-Cu72     | 86  | 4  | H8-C2-N4-Cu80     | 94  | 2   | H8-C2-N4-Cu96     | 110 | 10  |
| H8-C2-N4-Cu120    | 134 | 1  | H8-C2-N4-O2       | 16  | 5   | H8-C3             | 11  | 5   |
| H8-C3-Cu72        | 83  | 1  | H8-C3-O1-Cu48     | 60  | 1   | H8-C3-O1-Cu64     | 76  | 1   |
| H8-C3-O1-Cu72     | 84  | 1  | H8-C3-O2-Cu36     | 49  | 1   | H8-C3-O2-Cu48     | 61  | 3   |
| H8-C3-O2-Cu64     | 77  | 2  | H8-C3-O2-Cu96     | 109 | 2   | H8-C3-O3          | 14  | 2   |
| H8-C3-O3-Cu48     | 62  | 3  | H8-C3-O3-Cu64     | 78  | 7   | H8-C3-O3-Cu72     | 86  | 6   |
| H8-C3-O3-Cu80     | 94  | 1  | H8-C3-O3-Cu96     | 110 | 6   | H8-C3-N2-Cu36     | 49  | 1   |
| H8-C3-N2-Cu48     | 61  | 16 | H8-C3-N2-Cu60     | 73  | 2   | H8-C3-N2-Cu64     | 77  | 30  |
| H8-C3-N2-Cu72     | 85  | 9  | H8-C3-N2-Cu80     | 93  | 2   | H8-C3-N2-Cu96     | 109 | 28  |
| H8-C3-N2-Cu120    | 133 | 2  | H8-C3-N2-O1-Cu36  | 50  | 1   | H8-C3-N2-O1-Cu48  | 62  | 28  |
| H8-C3-N2-O1-Cu60  | 74  | 5  | H8-C3-N2-O1-Cu64  | 78  | 77  | H8-C3-N2-O1-Cu72  | 86  | 23  |
| H8-C3-N2-O1-Cu80  | 94  | 9  | H8-C3-N2-O1-Cu96  | 110 | 56  | H8-C3-N2-O1-Cu120 | 134 | 4   |
| H8-C4-Cu36        | 48  | 2  | H8-C4-Cu48        | 60  | 1   | H8-C4-Cu64        | 76  | 3   |
| H8-C4-Cu72        | 84  | 2  | H8-C4-Cu96        | 108 | 3   | H8-C4-O1          | 13  | 4   |
| H8-C4-O1-Cu48     | 61  | 10 | H8-C4-O1-Cu60     | 73  | 1   | H8-C4-O1-Cu64     | 77  | 16  |
| H8-C4-O1-Cu72     | 85  | 2  | H8-C4-O1-Cu80     | 93  | 1   | H8-C4-O1-Cu96     | 109 | 7   |
| H8-C4-O2-Cu36     | 50  | 1  | H8-C4-O2-Cu48     | 62  | 21  | H8-C4-O2-Cu60     | 74  | 3   |
| H8-C4-O2-Cu64     | 78  | 61 | H8-C4-O2-Cu72     | 86  | 9   | H8-C4-O2-Cu80     | 94  | 11  |
| H8-C4-O2-Cu96     | 110 | 56 | H8-C4-O2-Cu120    | 134 | 1   | H8-C4-N1-O3-Cu36  | 52  | 20  |
| H8-C4-N1-O3-Cu48  | 64  | 18 | H8-C4-N1-O3-Cu54  | 70  | 20  | H8-C4-N1-O3-Cu64  | 80  | 3   |
| H8-C4-N1-O3-Cu72  | 88  | 17 | H8-C4-N1-O3-Cu96  | 112 | 2   | H8-C4-N1-O3-Cu144 | 160 | 15  |
| H8-C4-N2-Cu36     | 50  | 2  | H8-C4-N2-Cu48     | 62  | 32  | H8-C4-N2-Cu60     | 74  | 10  |



|                   |     |     |                   |     |     |                   |     |     |
|-------------------|-----|-----|-------------------|-----|-----|-------------------|-----|-----|
| H8-C4-N2-Cu64     | 78  | 120 | H8-C4-N2-Cu72     | 86  | 19  | H8-C4-N2-Cu80     | 94  | 26  |
| H8-C4-N2-Cu96     | 110 | 97  | H8-C4-N2-Cu120    | 134 | 15  | H8-C4-N2-O3       | 17  | 34  |
| H8-C4-N2-O3-Cu36  | 53  | 8   | H8-C4-N2-O3-Cu48  | 65  | 28  | H8-C4-N2-O3-Cu54  | 71  | 20  |
| H8-C4-N2-O3-Cu64  | 81  | 8   | H8-C4-N2-O3-Cu72  | 89  | 6   | H8-C4-N2-O3-Cu96  | 113 | 10  |
| H8-C4-N2-O3-Cu144 | 161 | 13  | H8-C4-N2-O3-Cu162 | 179 | 1   | H8-C4-N4          | 16  | 8   |
| H8-C4-N4-O1       | 17  | 30  | H8-C4-N4-O2       | 18  | 10  | H8-C5-Cu48        | 61  | 4   |
| H8-C5-Cu60        | 73  | 1   | H8-C5-Cu64        | 77  | 11  | H8-C5-Cu72        | 85  | 2   |
| H8-C5-Cu80        | 93  | 1   | H8-C5-Cu96        | 109 | 9   | H8-C5-O1          | 14  | 171 |
| H8-C5-O1-Cu36     | 50  | 1   | H8-C5-O1-Cu48     | 62  | 28  | H8-C5-O1-Cu60     | 74  | 11  |
| H8-C5-O1-Cu64     | 78  | 95  | H8-C5-O1-Cu72     | 86  | 8   | H8-C5-O1-Cu80     | 94  | 13  |
| H8-C5-O1-Cu96     | 110 | 78  | H8-C5-O1-Cu120    | 134 | 8   | H8-C5-O3          | 16  | 11  |
| H8-C5-O4          | 17  | 15  | H8-C5-N1-O2-Cu27  | 43  | 12  | H8-C5-N1-O2-Cu36  | 52  | 43  |
| H8-C5-N1-O2-Cu48  | 64  | 56  | H8-C5-N1-O2-Cu54  | 70  | 274 | H8-C5-N1-O2-Cu72  | 88  | 27  |
| H8-C5-N1-O2-Cu96  | 112 | 5   | H8-C5-N1-O2-Cu144 | 160 | 15  | H8-C5-N1-O2-Cu162 | 178 | 1   |
| H8-C5-N1-O4-Cu36  | 54  | 4   | H8-C5-N1-O4-Cu48  | 66  | 54  | H8-C5-N1-O4-Cu54  | 72  | 39  |
| H8-C5-N1-O4-Cu64  | 82  | 15  | H8-C5-N1-O4-Cu72  | 90  | 36  | H8-C5-N1-O4-Cu96  | 114 | 11  |
| H8-C5-N1-O4-Cu108 | 126 | 1   | H8-C5-N1-O4-Cu144 | 162 | 27  | H8-C5-N1-O4-Cu162 | 180 | 5   |
| H8-C5-N2-O1       | 16  | 1   | H8-C5-N2-O2       | 17  | 5   | H8-C5-N2-O3       | 18  | 3   |
| H8-C5-N4          | 17  | 24  | H8-C5-N4-O2       | 19  | 21  | H8-C5-N10-O2      | 25  | 3   |
| H8-C6-Cu36        | 50  | 4   | H8-C6-Cu48        | 62  | 15  | H8-C6-Cu60        | 74  | 4   |
| H8-C6-Cu64        | 78  | 48  | H8-C6-Cu72        | 86  | 7   | H8-C6-Cu80        | 94  | 16  |
| H8-C6-Cu96        | 110 | 44  | H8-C6-Cu120       | 134 | 10  | H8-C6-O1          | 15  | 9   |
| H8-C6-O2          | 16  | 10  | H8-C6-O3          | 17  | 28  | H8-C6-N2          | 16  | 2   |
| H8-C6-N2-O1       | 17  | 17  | H8-C6-N2-O2       | 18  | 10  | H8-C6-N2-O3       | 19  | 38  |
| H8-C6-N3-O2-Cu36  | 55  | 22  | H8-C6-N3-O2-Cu48  | 67  | 78  | H8-C6-N3-O2-Cu54  | 73  | 181 |
| H8-C6-N3-O2-Cu64  | 83  | 35  | H8-C6-N3-O2-Cu72  | 91  | 15  | H8-C6-N3-O2-Cu96  | 115 | 22  |
| H8-C6-N3-O2-Cu144 | 163 | 13  | H8-C6-N3-O2-Cu162 | 181 | 2   | H8-C6-N4-Cu62     | 80  | 3   |
| H8-C6-N4-Cu66     | 84  | 1   | H8-C6-N4-O1       | 19  | 9   | H8-C6-N6-O5       | 25  | 5   |
| H8-C6-N6-O6       | 26  | 20  | H8-C6-N8-O2       | 24  | 1   | H8-C6-N8-O3       | 25  | 2   |
| H8-C6-N8-O4       | 26  | 5   | H8-C6-N10-O1      | 25  | 4   | H8-C7             | 15  | 3   |
| H8-C7-O1          | 16  | 11  | H8-C7-O2          | 17  | 60  | H8-C7-O3          | 18  | 7   |
| H8-C7-N2          | 17  | 29  | H8-C7-N2-O2       | 19  | 27  | H8-C7-N2-O3       | 20  | 3   |
| H8-C7-N4          | 19  | 38  | H8-C7-N4-O7       | 26  | 8   | H8-C7-N6-O3       | 24  | 10  |
| H8-C7-N6-O4       | 25  | 25  | H8-C7-N6-O5       | 26  | 87  | H8-C7-N8-O3       | 26  | 9   |
| H8-C8             | 16  | 7   | H8-C8-O1          | 17  | 56  | H8-C8-O2          | 18  | 2   |
| H8-C8-O3          | 19  | 8   | H8-C8-N2          | 18  | 2   | H8-C8-N2-O1       | 19  | 27  |
| H8-C8-N4-O5       | 25  | 19  | H8-C8-N4-O6       | 26  | 56  | H8-C8-N6-O3       | 25  | 11  |
| H8-C8-N6-O4       | 26  | 113 | H8-C8-N8-O2       | 26  | 1   | H8-C9             | 17  | 22  |
| H8-C9-O3          | 20  | 74  | H8-C9-N2          | 19  | 4   | H8-C9-N2-O1       | 20  | 2   |
| H8-C9-N2-O2       | 21  | 6   | H8-C9-N2-O7       | 26  | 4   | H8-C9-N4-O4       | 25  | 2   |
| H8-C9-N4-O5       | 26  | 56  | H8-C9-N6-O1       | 24  | 3   | H8-C9-N6-O2       | 25  | 5   |
| H8-C9-N6-O3       | 26  | 54  | H8-C10-N2         | 20  | 3   | H8-C10-N2-O1      | 21  | 9   |
| H8-C10-N2-O3      | 23  | 2   | H8-C10-N2-O4      | 24  | 2   | H8-C10-N2-O5      | 25  | 2   |
| H8-C10-N2-O6      | 26  | 21  | H8-C10-N4-O3      | 25  | 9   | H8-C10-N4-O4      | 26  | 116 |
| H8-C10-N6-O2      | 26  | 24  | H8-C11-N2-O1      | 22  | 3   | H8-C11-N2-O2      | 23  | 1   |
| H8-C11-N2-O4      | 25  | 3   | H8-C11-N2-O5      | 26  | 7   | H8-C11-N4-O2      | 25  | 16  |
| H8-C11-N4-O3      | 26  | 21  | H8-C12-O6         | 26  | 2   | H8-C12-N2-O2      | 24  | 5   |
| H8-C12-N2-O4      | 26  | 19  | H8-C12-N4-O2      | 26  | 9   | H8-C14-N2-O4      | 28  | 2   |
| H9-N2-Cu20        | 31  | 5   | H9-N3-Cu19        | 31  | 1   | H9-N3-Cu36        | 48  | 13  |
| H9-C1-N5-Cu48     | 63  | 1   | H9-C1-N5-Cu96     | 111 | 1   | H9-C2-N3-Cu36     | 50  | 1   |
| H9-C2-N3-Cu48     | 62  | 2   | H9-C2-N3-Cu64     | 78  | 14  | H9-C2-N3-Cu72     | 86  | 1   |
| H9-C2-N3-Cu80     | 94  | 1   | H9-C2-N3-Cu96     | 110 | 5   | H9-C2-N3-Cu120    | 134 | 2   |
| H9-C2-N3-O1-Cu36  | 51  | 1   | H9-C2-N3-O1-Cu48  | 63  | 3   | H9-C2-N3-O1-Cu64  | 79  | 12  |
| H9-C2-N3-O1-Cu72  | 87  | 1   | H9-C2-N3-O1-Cu96  | 111 | 12  | H9-C2-N3-O1-Cu120 | 135 | 1   |
| H9-C3-N1-Cu36     | 49  | 47  | H9-C3-N1-Cu48     | 61  | 1   | H9-C3-N1-O1       | 14  | 6   |
| H9-C3-N1-O1-Cu36  | 50  | 1   | H9-C3-N1-O1-Cu48  | 62  | 12  | H9-C3-N1-O1-Cu64  | 78  | 13  |
| H9-C3-N1-O1-Cu96  | 110 | 10  | H9-C3-N1-O1-Cu120 | 134 | 1   | H9-C3-N1-O2-Cu48  | 63  | 21  |
| H9-C3-N1-O2-Cu60  | 75  | 5   | H9-C3-N1-O2-Cu64  | 79  | 29  | H9-C3-N1-O2-Cu72  | 87  | 7   |
| H9-C3-N1-O2-Cu80  | 95  | 1   | H9-C3-N1-O2-Cu96  | 111 | 29  | H9-C3-N1-O2-Cu120 | 135 | 1   |
| H9-C3-N1-O3-Cu36  | 52  | 190 | H9-C3-N3-Cu48     | 63  | 3   | H9-C3-N3-Cu60     | 75  | 4   |
| H9-C3-N3-Cu64     | 79  | 42  | H9-C3-N3-Cu72     | 87  | 3   | H9-C3-N3-Cu80     | 95  | 12  |

|                   |     |     |                    |     |     |                   |     |     |
|-------------------|-----|-----|--------------------|-----|-----|-------------------|-----|-----|
| H9-C3-N3-Cu96     | 111 | 43  | H9-C3-N3-Cu120     | 135 | 3   | H9-C4-N1-Cu48     | 62  | 9   |
| H9-C4-N1-Cu60     | 74  | 1   | H9-C4-N1-Cu64      | 78  | 22  | H9-C4-N1-Cu72     | 86  | 2   |
| H9-C4-N1-Cu80     | 94  | 1   | H9-C4-N1-Cu96      | 110 | 15  | H9-C4-N1-Cu120    | 134 | 1   |
| H9-C4-N1-O1-Cu36  | 51  | 2   | H9-C4-N1-O1-Cu48   | 63  | 40  | H9-C4-N1-O1-Cu60  | 75  | 10  |
| H9-C4-N1-O1-Cu64  | 79  | 162 | H9-C4-N1-O1-Cu72   | 87  | 18  | H9-C4-N1-O1-Cu80  | 95  | 27  |
| H9-C4-N1-O1-Cu96  | 111 | 96  | H9-C4-N1-O1-Cu120  | 135 | 22  | H9-C4-N1-O3       | 17  | 41  |
| H9-C4-N1-O3-Cu36  | 53  | 10  | H9-C4-N1-O3-Cu48   | 65  | 25  | H9-C4-N1-O3-Cu54  | 71  | 20  |
| H9-C4-N1-O3-Cu64  | 81  | 5   | H9-C4-N1-O3-Cu72   | 89  | 15  | H9-C4-N1-O3-Cu96  | 113 | 5   |
| H9-C4-N1-O3-Cu144 | 161 | 11  | H9-C4-N5           | 18  | 9   | H9-C4-N5-O1       | 19  | 1   |
| H9-C5-N1          | 15  | 14  | H9-C5-N1-Cu36      | 51  | 1   | H9-C5-N1-Cu48     | 63  | 25  |
| H9-C5-N1-Cu60     | 75  | 11  | H9-C5-N1-Cu64      | 79  | 133 | H9-C5-N1-Cu72     | 87  | 18  |
| H9-C5-N1-Cu80     | 95  | 27  | H9-C5-N1-Cu96      | 111 | 109 | H9-C5-N1-Cu120    | 135 | 16  |
| H9-C5-N1-O1       | 16  | 1   | H9-C5-N1-O2        | 17  | 48  | H9-C5-N1-O2-Cu36  | 53  | 10  |
| H9-C5-N1-O2-Cu48  | 65  | 32  | H9-C5-N1-O2-Cu54   | 71  | 20  | H9-C5-N1-O2-Cu64  | 81  | 4   |
| H9-C5-N1-O2-Cu72  | 89  | 9   | H9-C5-N1-O2-Cu96   | 113 | 5   | H9-C5-N1-O2-Cu144 | 161 | 13  |
| H9-C5-N1-O2-Cu162 | 179 | 3   | H9-C5-N1-O3        | 18  | 2   | H9-C5-N1-O4       | 19  | 35  |
| H9-C5-N1-O4-Cu36  | 55  | 3   | H9-C5-N1-O4-Cu48   | 67  | 21  | H9-C5-N1-O4-Cu54  | 73  | 20  |
| H9-C5-N1-O4-Cu64  | 83  | 10  | H9-C5-N1-O4-Cu72   | 91  | 21  | H9-C5-N1-O4-Cu96  | 115 | 5   |
| H9-C5-N1-O4-Cu144 | 163 | 18  | H9-C5-N1-O4-Cu162  | 181 | 3   | H9-C5-N2-O3-Cu48  | 67  | 62  |
| H9-C5-N2-O3-Cu54  | 73  | 331 | H9-C5-N2-O3-Cu64   | 83  | 31  | H9-C5-N2-O3-Cu72  | 91  | 51  |
| H9-C5-N2-O3-Cu96  | 115 | 26  | H9-C5-N2-O3-Cu144  | 163 | 15  | H9-C5-N2-O3-Cu162 | 181 | 3   |
| H9-C5-N3          | 17  | 7   | H9-C5-N3-O1        | 18  | 25  | H9-C5-N3-O2       | 19  | 4   |
| H9-C5-N3-O3       | 20  | 27  | H9-C6-N1           | 16  | 37  | H9-C6-N1-O1       | 17  | 16  |
| H9-C6-N1-O2       | 18  | 9   | H9-C6-N1-O2-Cu36   | 54  | 29  | H9-C6-N1-O3       | 19  | 8   |
| H9-C6-N1-O4       | 20  | 6   | H9-C6-N3           | 18  | 20  | H9-C6-N3-O1       | 19  | 15  |
| H9-C6-N3-O2       | 20  | 87  | H9-C6-N3-O2-Cu36   | 56  | 1   | H9-C6-N3-O2-Cu48  | 68  | 21  |
| H9-C6-N3-O2-Cu54  | 74  | 19  | H9-C6-N3-O2-Cu60   | 80  | 4   | H9-C6-N3-O2-Cu64  | 84  | 11  |
| H9-C6-N3-O2-Cu72  | 92  | 12  | H9-C6-N3-O2-Cu80   | 100 | 2   | H9-C6-N3-O2-Cu96  | 116 | 9   |
| H9-C6-N3-O2-Cu108 | 128 | 1   | H9-C6-N3-O2-Cu144  | 164 | 18  | H9-C6-N3-O2-Cu162 | 182 | 1   |
| H9-C6-N7-O4       | 26  | 10  | H9-C6-N7-O5        | 27  | 19  | H9-C6-N9-O2       | 26  | 3   |
| H9-C7-N1          | 17  | 4   | H9-C7-N1-O1        | 18  | 1   | H9-C7-N1-O2       | 19  | 7   |
| H9-C7-N1-O3       | 20  | 28  | H9-C7-N3-O1        | 20  | 26  | H9-C7-N5-O4       | 25  | 2   |
| H9-C7-N5-O5       | 26  | 11  | H9-C7-N5-O6        | 27  | 66  | H9-C7-N7-O2       | 25  | 5   |
| H9-C7-N7-O3       | 26  | 1   | H9-C7-N7-O4        | 27  | 37  | H9-C7-N9-O2       | 27  | 4   |
| H9-C8-N1          | 18  | 25  | H9-C8-N1-O1        | 19  | 7   | H9-C8-N1-O2       | 20  | 10  |
| H9-C8-N3          | 20  | 6   | H9-C8-N3-O6        | 26  | 3   | H9-C8-N3-O7       | 27  | 5   |
| H9-C8-N5-O4       | 26  | 35  | H9-C8-N5-O5        | 27  | 127 | H9-C8-N7-O2       | 26  | 1   |
| H9-C8-N7-O3       | 27  | 65  | H9-C8-N9-O1        | 27  | 1   | H9-C9-O1          | 19  | 219 |
| H9-C9-N1-O1       | 20  | 10  | H9-C9-N1-O3-Cu48   | 70  | 34  | H9-C9-N1-O3-Cu54  | 76  | 226 |
| H9-C9-N1-O3-Cu60  | 82  | 4   | H9-C9-N1-O3-Cu64   | 86  | 19  | H9-C9-N1-O3-Cu72  | 94  | 132 |
| H9-C9-N1-O3-Cu80  | 102 | 7   | H9-C9-N1-O3-Cu96   | 118 | 13  | H9-C9-N1-O3-Cu108 | 130 | 17  |
| H9-C9-N1-O3-Cu120 | 142 | 8   | H9-C9-N1-O3-Cu144  | 166 | 9   | H9-C9-N1-O3-Cu162 | 184 | 1   |
| H9-C9-N3-O4       | 25  | 2   | H9-C9-N3-O5        | 26  | 1   | H9-C9-N3-O6       | 27  | 25  |
| H9-C9-N5-O2       | 25  | 3   | H9-C9-N5-O3        | 26  | 20  | H9-C9-N5-O4       | 27  | 132 |
| H9-C9-N7-O1       | 26  | 4   | H9-C9-N7-O2        | 27  | 22  | H9-C10-N1         | 20  | 5   |
| H9-C10-N1-O1      | 21  | 3   | H9-C10-N1-O2       | 22  | 4   | H9-C10-N3-O4      | 26  | 11  |
| H9-C10-N3-O5      | 27  | 64  | H9-C10-N5-O2       | 26  | 8   | H9-C10-N5-O3      | 27  | 77  |
| H9-C11-N1-O2      | 23  | 1   | H9-C11-N1-O3       | 24  | 7   | H9-C11-N3-O4      | 27  | 56  |
| H9-C11-N5-O2      | 27  | 39  | H9-C12-N1-O2       | 24  | 1   | H9-C12-N1-O3      | 25  | 2   |
| H9-C12-N1-O4      | 26  | 1   | H9-C12-N1-O5       | 27  | 5   | H9-C12-N3-O3      | 27  | 17  |
| H9-C13-N1-O4      | 27  | 6   | H10-N7-Cu32        | 49  | 10  | H10-N7-Cu33       | 50  | 24  |
| H10-N7-Cu36       | 53  | 82  | H10-N9-Cu34        | 53  | 52  | H10-C2-N2-Cu48    | 62  | 1   |
| H10-C2-N2-Cu96    | 110 | 1   | H10-C2-N4-Cu48     | 64  | 2   | H10-C2-N4-Cu64    | 80  | 11  |
| H10-C2-N4-Cu72    | 88  | 1   | H10-C2-N4-Cu80     | 96  | 3   | H10-C2-N4-Cu96    | 112 | 9   |
| H10-C2-N4-Cu120   | 136 | 1   | H10-C3-N2-Cu48     | 63  | 1   | H10-C3-N2-Cu64    | 79  | 9   |
| H10-C3-N2-Cu72    | 87  | 2   | H10-C3-N2-Cu80     | 95  | 1   | H10-C3-N2-Cu96    | 111 | 4   |
| H10-C3-N2-Cu120   | 135 | 1   | H10-C3-N2-O1-Cu48  | 64  | 11  | H10-C3-N2-O1-Cu60 | 76  | 1   |
| H10-C3-N2-O1-Cu64 | 80  | 39  | H10-C3-N2-O1-Cu72  | 88  | 9   | H10-C3-N2-O1-Cu80 | 96  | 4   |
| H10-C3-N2-O1-Cu96 | 112 | 27  | H10-C3-N2-O1-Cu120 | 136 | 3   | H10-C4-Cu64       | 78  | 1   |
| H10-C4-O1-Cu48    | 63  | 1   | H10-C4-O1-Cu64     | 79  | 5   | H10-C4-O1-Cu96    | 111 | 5   |
| H10-C4-O2-Cu48    | 64  | 3   | H10-C4-O2-Cu64     | 80  | 17  | H10-C4-O2-Cu96    | 112 | 16  |

|                    |     |     |                    |     |     |                     |     |     |
|--------------------|-----|-----|--------------------|-----|-----|---------------------|-----|-----|
| H10-C4-O2-Cu120    | 136 | 2   | H10-C4-O3          | 17  | 8   | H10-C4-N2-Cu48      | 64  | 8   |
| H10-C4-N2-Cu60     | 76  | 8   | H10-C4-N2-Cu64     | 80  | 106 | H10-C4-N2-Cu72      | 88  | 11  |
| H10-C4-N2-Cu80     | 96  | 41  | H10-C4-N2-Cu96     | 112 | 85  | H10-C4-N2-Cu120     | 136 | 16  |
| H10-C5-Cu48        | 63  | 1   | H10-C5-Cu64        | 79  | 6   | H10-C5-Cu72         | 87  | 2   |
| H10-C5-Cu96        | 111 | 7   | H10-C5-O1-Cu36     | 52  | 1   | H10-C5-O1-Cu48      | 64  | 12  |
| H10-C5-O1-Cu64     | 80  | 54  | H10-C5-O1-Cu72     | 88  | 6   | H10-C5-O1-Cu80      | 96  | 5   |
| H10-C5-O1-Cu96     | 112 | 51  | H10-C5-O1-Cu120    | 136 | 7   | H10-C5-O4           | 19  | 3   |
| H10-C5-O5          | 20  | 4   | H10-C5-N1-O2-Cu27  | 45  | 11  | H10-C5-N1-O2-Cu36   | 54  | 67  |
| H10-C5-N1-O2-Cu48  | 66  | 29  | H10-C5-N1-O2-Cu54  | 72  | 262 | H10-C5-N1-O2-Cu64   | 82  | 8   |
| H10-C5-N1-O2-Cu72  | 90  | 58  | H10-C5-N1-O2-Cu96  | 114 | 7   | H10-C5-N1-O2-Cu144  | 162 | 10  |
| H10-C5-N1-O2-Cu162 | 180 | 1   | H10-C5-N2-O2       | 19  | 3   | H10-C5-N2-O3        | 20  | 28  |
| H10-C5-N2-O3-Cu48  | 68  | 14  | H10-C5-N2-O3-Cu54  | 74  | 20  | H10-C5-N2-O3-Cu60   | 80  | 3   |
| H10-C5-N2-O3-Cu64  | 84  | 17  | H10-C5-N2-O3-Cu72  | 92  | 17  | H10-C5-N2-O3-Cu96   | 116 | 9   |
| H10-C5-N2-O3-Cu144 | 164 | 13  | H10-C5-N2-O3-Cu162 | 182 | 5   | H10-C5-N2-O4        | 21  | 5   |
| H10-C5-N4          | 19  | 21  | H10-C5-N4-O1       | 20  | 4   | H10-C5-N4-O2        | 21  | 3   |
| H10-C6             | 16  | 27  | H10-C6-Cu48        | 64  | 7   | H10-C6-Cu60         | 76  | 3   |
| H10-C6-Cu64        | 80  | 54  | H10-C6-Cu72        | 88  | 6   | H10-C6-Cu80         | 96  | 5   |
| H10-C6-Cu96        | 112 | 37  | H10-C6-Cu120       | 136 | 9   | H10-C6-O1           | 17  | 3   |
| H10-C6-O2          | 18  | 7   | H10-C6-O3          | 19  | 10  | H10-C6-N2           | 18  | 3   |
| H10-C6-N2-O1       | 19  | 5   | H10-C6-N2-O2       | 20  | 14  | H10-C6-N2-O3        | 21  | 22  |
| H10-C6-N6-O3       | 25  | 3   | H10-C6-N6-O4       | 26  | 3   | H10-C6-N6-O18-Cu58  | 98  | 1   |
| H10-C6-N6-O18-Cu62 | 102 | 2   | H10-C6-N6-O18-Cu70 | 110 | 3   | H10-C7              | 17  | 3   |
| H10-C7-O1          | 18  | 53  | H10-C7-O2          | 19  | 35  | H10-C7-O3           | 20  | 1   |
| H10-C7-N2          | 19  | 12  | H10-C7-N2-O1       | 20  | 1   | H10-C7-N2-O2        | 21  | 62  |
| H10-C7-N4-O5       | 26  | 5   | H10-C7-N4-O7       | 28  | 6   | H10-C7-N6-O3        | 26  | 3   |
| H10-C7-N6-O4       | 27  | 1   | H10-C7-N6-O5       | 28  | 49  | H10-C7-N8-O2        | 27  | 2   |
| H10-C7-N8-O3       | 28  | 5   | H10-C7-N10-O1      | 28  | 4   | H10-C8              | 18  | 12  |
| H10-C8-O1          | 19  | 38  | H10-C8-O2          | 20  | 13  | H10-C8-O3           | 21  | 2   |
| H10-C8-N2          | 20  | 7   | H10-C8-N2-O1       | 21  | 22  | H10-C8-N4-O4        | 26  | 4   |
| H10-C8-N4-O5       | 27  | 21  | H10-C8-N4-O6       | 28  | 40  | H10-C8-N6           | 24  | 3   |
| H10-C8-N6-O2       | 26  | 1   | H10-C8-N6-O3       | 27  | 32  | H10-C8-N6-O4        | 28  | 144 |
| H10-C8-N8-O2       | 28  | 8   | H10-C8-N10         | 28  | 2   | H10-C9              | 19  | 68  |
| H10-C9-O2          | 21  | 8   | H10-C9-N1-O2-Cu48  | 70  | 42  | H10-C9-N1-O2-Cu54   | 76  | 605 |
| H10-C9-N1-O2-Cu60  | 82  | 5   | H10-C9-N1-O2-Cu64  | 86  | 35  | H10-C9-N1-O2-Cu72   | 94  | 57  |
| H10-C9-N1-O2-Cu80  | 102 | 2   | H10-C9-N1-O2-Cu96  | 118 | 67  | H10-C9-N1-O2-Cu108  | 130 | 47  |
| H10-C9-N1-O2-Cu120 | 142 | 8   | H10-C9-N1-O2-Cu144 | 166 | 5   | H10-C9-N1-O2-Cu162  | 184 | 1   |
| H10-C9-N1-O3-Cu54  | 77  | 4   | H10-C9-N1-O3-Cu60  | 83  | 9   | H10-C9-N1-O3-Cu64   | 87  | 9   |
| H10-C9-N1-O3-Cu72  | 95  | 6   | H10-C9-N1-O3-Cu80  | 103 | 10  | H10-C9-N1-O3-Cu81   | 104 | 6   |
| H10-C9-N1-O3-Cu96  | 119 | 16  | H10-C9-N1-O3-Cu108 | 131 | 10  | H10-C9-N1-O3-Cu120  | 143 | 10  |
| H10-C9-N1-O3-Cu144 | 167 | 9   | H10-C9-N2          | 21  | 7   | H10-C9-N2-O1        | 22  | 2   |
| H10-C9-N2-O2       | 23  | 1   | H10-C9-N4-O3       | 26  | 1   | H10-C9-N4-O4        | 27  | 5   |
| H10-C9-N4-O5       | 28  | 152 | H10-C9-N6-O2       | 27  | 6   | H10-C9-N6-O3        | 28  | 49  |
| H10-C9-N8-O1       | 28  | 3   | H10-C10-O1         | 21  | 4   | H10-C10-N2-Cu64     | 86  | 1   |
| H10-C10-N2-O1      | 23  | 5   | H10-C10-N2-O2      | 24  | 2   | H10-C10-N2-O6       | 28  | 8   |
| H10-C10-N4-O3      | 27  | 2   | H10-C10-N4-O4      | 28  | 72  | H10-C10-N6-O1       | 27  | 3   |
| H10-C10-N6-O2      | 28  | 47  | H10-C11-N2-O1      | 24  | 3   | H10-C11-N2-O2       | 25  | 11  |
| H10-C11-N2-O5      | 28  | 38  | H10-C11-N4-O2      | 27  | 2   | H10-C11-N4-O3       | 28  | 82  |
| H10-C11-N6         | 27  | 2   | H10-C12-O6         | 28  | 3   | H10-C12-N2-O4       | 28  | 22  |
| H10-C12-N4-O2      | 28  | 50  | H10-C13-O5         | 28  | 14  | H10-C13-N2-O3       | 28  | 42  |
| H10-C13-N4-O1      | 28  | 6   | H10-C14-N2-O2      | 28  | 15  | H10-C14-N2-O10-Cu64 | 100 | 1   |
| H10-C15-N2-O3      | 30  | 1   | H11-N6-Cu34        | 51  | 39  | H11-N6-Cu36         | 53  | 45  |
| H11-C3-N3-Cu48     | 65  | 2   | H11-C3-N3-Cu60     | 77  | 2   | H11-C3-N3-Cu64      | 81  | 15  |
| H11-C3-N3-Cu72     | 89  | 1   | H11-C3-N3-Cu80     | 97  | 6   | H11-C3-N3-Cu96      | 113 | 19  |
| H11-C3-N3-Cu120    | 137 | 1   | H11-C4-N1          | 16  | 12  | H11-C4-N1-Cu48      | 64  | 1   |
| H11-C4-N1-Cu64     | 80  | 7   | H11-C4-N1-Cu96     | 112 | 1   | H11-C4-N1-O1-Cu48   | 65  | 8   |
| H11-C4-N1-O1-Cu60  | 77  | 4   | H11-C4-N1-O1-Cu64  | 81  | 29  | H11-C4-N1-O1-Cu72   | 89  | 5   |
| H11-C4-N1-O1-Cu80  | 97  | 5   | H11-C4-N1-O1-Cu96  | 113 | 35  | H11-C4-N1-O1-Cu120  | 137 | 2   |
| H11-C5-N1-Cu34     | 51  | 2   | H11-C5-N1-Cu36     | 53  | 31  | H11-C5-N1-Cu48      | 65  | 9   |
| H11-C5-N1-Cu60     | 77  | 5   | H11-C5-N1-Cu64     | 81  | 75  | H11-C5-N1-Cu72      | 89  | 6   |
| H11-C5-N1-Cu80     | 97  | 22  | H11-C5-N1-Cu96     | 113 | 53  | H11-C5-N1-Cu120     | 137 | 6   |
| H11-C5-N1-O2       | 19  | 36  | H11-C5-N1-O2-Cu36  | 55  | 5   | H11-C5-N1-O2-Cu48   | 67  | 23  |

|                     |     |      |                     |     |     |                     |     |      |
|---------------------|-----|------|---------------------|-----|-----|---------------------|-----|------|
| H11-C5-N1-O2-Cu54   | 73  | 20   | H11-C5-N1-O2-Cu64   | 83  | 14  | H11-C5-N1-O2-Cu72   | 91  | 4    |
| H11-C5-N1-O2-Cu96   | 115 | 14   | H11-C5-N1-O2-Cu144  | 163 | 20  | H11-C5-N1-O2-Cu162  | 181 | 3    |
| H11-C5-N3-O1        | 20  | 1    | H11-C5-N3-O2        | 21  | 6   | H11-C5-N3-O3        | 22  | 3    |
| H11-C6-N1           | 18  | 12   | H11-C6-N1-O1        | 19  | 1   | H11-C6-N1-O2        | 20  | 10   |
| H11-C6-N1-O3        | 21  | 3    | H11-C6-N1-O4        | 22  | 2   | H11-C6-N3           | 20  | 6    |
| H11-C6-N3-O1        | 21  | 10   | H11-C6-N3-O4        | 24  | 1   | H11-C7-N1           | 19  | 2    |
| H11-C7-N1-O1        | 20  | 31   | H11-C7-N1-O2        | 21  | 4   | H11-C7-N1-O3        | 22  | 22   |
| H11-C7-N3           | 21  | 18   | H11-C7-N3-O1        | 22  | 8   | H11-C7-N3-O4        | 25  | 1    |
| H11-C7-N5-O2        | 25  | 1    | H11-C7-N5-O6        | 29  | 17  | H11-C7-N7-O3        | 28  | 11   |
| H11-C7-N7-O4        | 29  | 22   | H11-C7-N9-O2        | 29  | 2   | H11-C8-N1           | 20  | 26   |
| H11-C8-N1-O1        | 21  | 5    | H11-C8-N1-O2        | 22  | 12  | H11-C8-N3-O6        | 28  | 1    |
| H11-C8-N3-O7        | 29  | 13   | H11-C8-N5-O3        | 27  | 5   | H11-C8-N5-O4        | 28  | 28   |
| H11-C8-N5-O5        | 29  | 84   | H11-C8-N7-O2        | 28  | 2   | H11-C8-N7-O3        | 29  | 47   |
| H11-C8-N9-O1        | 29  | 3    | H11-C9-N1-O1        | 22  | 8   | H11-C9-N1-O2        | 23  | 31   |
| H11-C9-N1-O2-Cu48   | 71  | 1    | H11-C9-N1-O2-Cu54   | 77  | 13  | H11-C9-N1-O2-Cu60   | 83  | 7    |
| H11-C9-N1-O2-Cu64   | 87  | 9    | H11-C9-N1-O2-Cu72   | 95  | 12  | H11-C9-N1-O2-Cu80   | 103 | 10   |
| H11-C9-N1-O2-Cu81   | 104 | 2    | H11-C9-N1-O2-Cu96   | 119 | 18  | H11-C9-N1-O2-Cu108  | 131 | 5    |
| H11-C9-N1-O2-Cu120  | 143 | 3    | H11-C9-N1-O2-Cu144  | 167 | 12  | H11-C9-N1-O2-Cu162  | 185 | 1    |
| H11-C9-N1-O3        | 24  | 35   | H11-C9-N1-O3-Cu54   | 78  | 12  | H11-C9-N1-O3-Cu60   | 84  | 6    |
| H11-C9-N1-O3-Cu64   | 88  | 7    | H11-C9-N1-O3-Cu72   | 96  | 19  | H11-C9-N1-O3-Cu80   | 104 | 9    |
| H11-C9-N1-O3-Cu81   | 105 | 7    | H11-C9-N1-O3-Cu96   | 120 | 9   | H11-C9-N1-O3-Cu108  | 132 | 1    |
| H11-C9-N1-O3-Cu120  | 144 | 8    | H11-C9-N1-O3-Cu144  | 168 | 12  | H11-C9-N3-O4        | 27  | 1    |
| H11-C9-N3-O5        | 28  | 8    | H11-C9-N3-O6        | 29  | 31  | H11-C9-N5-O3        | 28  | 6    |
| H11-C9-N5-O4        | 29  | 119  | H11-C9-N7-O2        | 29  | 40  | H11-C10-N1-O1       | 23  | 1    |
| H11-C10-N3-O4       | 28  | 8    | H11-C10-N3-O5       | 29  | 56  | H11-C10-N5-O2       | 28  | 3    |
| H11-C10-N5-O3       | 29  | 185  | H11-C10-N7-O1       | 29  | 10  | H11-C11-N1          | 23  | 1    |
| H11-C11-N1-O1       | 24  | 2    | H11-C11-N1-O2       | 25  | 7   | H11-C11-N1-O3       | 26  | 5    |
| H11-C11-N1-O5       | 28  | 4    | H11-C11-N1-O6       | 29  | 1   | H11-C11-N2-O2-Cu54  | 80  | 225  |
| H11-C11-N2-O2-Cu60  | 86  | 22   | H11-C11-N2-O2-Cu64  | 90  | 25  | H11-C11-N2-O2-Cu72  | 98  | 17   |
| H11-C11-N2-O2-Cu80  | 106 | 70   | H11-C11-N2-O2-Cu81  | 107 | 71  | H11-C11-N2-O2-Cu96  | 122 | 26   |
| H11-C11-N2-O2-Cu108 | 134 | 5    | H11-C11-N2-O2-Cu120 | 146 | 54  | H11-C11-N2-O2-Cu144 | 170 | 11   |
| H11-C11-N2-O2-Cu162 | 188 | 3    | H11-C11-N3-O3       | 28  | 8   | H11-C11-N3-O4       | 29  | 122  |
| H11-C11-N5-O1       | 28  | 1    | H11-C11-N5-O2       | 29  | 33  | H11-C12-N1-O1       | 25  | 1    |
| H11-C12-N1-O2       | 26  | 8    | H11-C12-N1-O3       | 27  | 14  | H11-C12-N1-O4       | 28  | 1    |
| H11-C12-N1-O5       | 29  | 9    | H11-C12-N3-O2       | 28  | 3   | H11-C12-N3-O3       | 29  | 96   |
| H11-C12-N5-O1       | 29  | 36   | H11-C13-N1-O3       | 28  | 2   | H11-C13-N1-O4       | 29  | 24   |
| H11-C13-N1-O5       | 30  | 4    | H11-C13-N3-O2       | 29  | 46  | H11-C14-N1-O3       | 29  | 16   |
| H11-C14-N3-O1       | 29  | 26   | H11-C15-N1-O1       | 28  | 1   | H11-C15-N1-O2       | 29  | 3    |
| H11-C15-N1-O3       | 30  | 1    | H11-C16-N1-O2       | 30  | 2   | H12-N5-Cu36         | 53  | 63   |
| H12-C2-O4-Cu12      | 30  | 7117 | H12-C3-O6           | 21  | 84  | H12-C3-N2-Cu60      | 77  | 1    |
| H12-C3-N2-Cu64      | 81  | 3    | H12-C3-N2-Cu120     | 137 | 1   | H12-C4-O1           | 17  | 1    |
| H12-C4-O2           | 18  | 8    | H12-C4-N2-Cu48      | 66  | 1   | H12-C4-N2-Cu60      | 78  | 2    |
| H12-C4-N2-Cu64      | 82  | 15   | H12-C4-N2-Cu72      | 90  | 2   | H12-C4-N2-Cu80      | 98  | 4    |
| H12-C4-N2-Cu96      | 114 | 21   | H12-C4-N2-Cu120     | 138 | 2   | H12-C4-N4-O2-Cu62   | 84  | 3    |
| H12-C4-N4-O2-Cu68   | 90  | 3    | H12-C4-N4-O4-Cu64   | 88  | 9   | H12-C4-N4-O4-Cu66   | 90  | 10   |
| H12-C4-N4-O4-Cu70   | 94  | 1    | H12-C5-Cu64         | 81  | 2   | H12-C5-Cu96         | 113 | 1    |
| H12-C5-Cu120        | 137 | 1    | H12-C5-O1-Cu64      | 82  | 9   | H12-C5-O1-Cu72      | 90  | 2    |
| H12-C5-O1-Cu96      | 114 | 6    | H12-C5-N1-O2        | 20  | 3   | H12-C5-N2-O3        | 22  | 7    |
| H12-C6-Cu48         | 66  | 2    | H12-C6-Cu60         | 78  | 1   | H12-C6-Cu64         | 82  | 16   |
| H12-C6-Cu72         | 90  | 4    | H12-C6-Cu80         | 98  | 6   | H12-C6-Cu96         | 114 | 6    |
| H12-C6-Cu120        | 138 | 1    | H12-C6-O3           | 21  | 1   | H12-C6-O6           | 24  | 5492 |
| H12-C6-N1-O2-Cu27   | 48  | 64   | H12-C6-N1-O2-Cu36   | 57  | 17  | H12-C6-N1-O2-Cu48   | 69  | 153  |
| H12-C6-N1-O2-Cu54   | 75  | 719  | H12-C6-N1-O2-Cu64   | 85  | 123 | H12-C6-N1-O2-Cu72   | 93  | 42   |
| H12-C6-N1-O2-Cu96   | 117 | 94   | H12-C6-N1-O2-Cu144  | 165 | 36  | H12-C6-N1-O2-Cu162  | 183 | 2    |
| H12-C6-N2-O1        | 21  | 4    | H12-C6-N2-O2        | 22  | 12  | H12-C6-N4-Cu62      | 84  | 2    |
| H12-C6-N4-Cu64      | 86  | 1    | H12-C6-N4-Cu72      | 94  | 1   | H12-C6-N4-O2-Cu62   | 86  | 1    |
| H12-C6-N4-O2-Cu64   | 88  | 1    | H12-C6-N4-O2-Cu68   | 92  | 3   | H12-C6-N4-O2-Cu70   | 94  | 3    |
| H12-C7              | 19  | 10   | H12-C7-O1           | 20  | 29  | H12-C7-O2           | 21  | 46   |
| H12-C7-O3           | 22  | 2    | H12-C7-N2           | 21  | 7   | H12-C7-N2-O1        | 22  | 1    |
| H12-C7-N2-O2        | 23  | 4    | H12-C7-N4-O3        | 26  | 1   | H12-C7-N4-O4        | 27  | 1    |
| H12-C7-N6-O3        | 28  | 1    | H12-C7-N6-O5        | 30  | 10  | H12-C8              | 20  | 10   |

|                     |     |     |                     |     |     |                     |     |     |
|---------------------|-----|-----|---------------------|-----|-----|---------------------|-----|-----|
| H12-C8-O1           | 21  | 28  | H12-C8-O3           | 23  | 4   | H12-C8-N2           | 22  | 5   |
| H12-C8-N2-O1        | 23  | 6   | H12-C8-N2-O2        | 24  | 5   | H12-C8-N2-O3        | 25  | 4   |
| H12-C8-N4-O4        | 28  | 1   | H12-C8-N4-O5        | 29  | 13  | H12-C8-N4-O6        | 30  | 15  |
| H12-C8-N6-O2        | 28  | 2   | H12-C8-N6-O3        | 29  | 14  | H12-C8-N6-O4        | 30  | 38  |
| H12-C8-N8-O2        | 30  | 4   | H12-C9              | 21  | 49  | H12-C9-O1           | 22  | 10  |
| H12-C9-N2           | 23  | 1   | H12-C9-N2-O4        | 27  | 5   | H12-C9-N2-O7        | 30  | 10  |
| H12-C9-N4-O4        | 29  | 22  | H12-C9-N4-O5        | 30  | 108 | H12-C9-N6-O2        | 29  | 3   |
| H12-C9-N6-O3        | 30  | 61  | H12-C9-N8-O1        | 30  | 1   | H12-C10             | 22  | 5   |
| H12-C10-N2          | 24  | 1   | H12-C10-N2-O1       | 25  | 2   | H12-C10-N2-O6       | 30  | 14  |
| H12-C10-N4-O3       | 29  | 17  | H12-C10-N4-O4       | 30  | 150 | H12-C10-N6-O1       | 29  | 2   |
| H12-C10-N6-O2       | 30  | 74  | H12-C11-N2          | 25  | 2   | H12-C11-N2-O1       | 26  | 13  |
| H12-C11-N2-O2       | 27  | 39  | H12-C11-N2-O2-Cu54  | 81  | 5   | H12-C11-N2-O2-Cu64  | 91  | 5   |
| H12-C11-N2-O2-Cu80  | 107 | 21  | H12-C11-N2-O2-Cu81  | 108 | 13  | H12-C11-N2-O2-Cu96  | 123 | 19  |
| H12-C11-N2-O2-Cu108 | 135 | 1   | H12-C11-N2-O2-Cu120 | 147 | 13  | H12-C11-N2-O2-Cu144 | 171 | 12  |
| H12-C11-N2-O2-Cu162 | 189 | 3   | H12-C11-N2-O3       | 28  | 2   | H12-C11-N2-O4       | 29  | 15  |
| H12-C11-N2-O5       | 30  | 41  | H12-C11-N4-O2       | 29  | 5   | H12-C11-N4-O3       | 30  | 190 |
| H12-C11-N6-O1       | 30  | 75  | H12-C12-O4          | 28  | 2   | H12-C12-O6          | 30  | 2   |
| H12-C12-N2-O1       | 27  | 3   | H12-C12-N2-O2       | 28  | 5   | H12-C12-N2-O3       | 29  | 8   |
| H12-C12-N2-O4       | 30  | 102 | H12-C12-N4-O2       | 30  | 140 | H12-C13-O5          | 30  | 11  |
| H12-C13-N2-O2       | 29  | 8   | H12-C13-N2-O3       | 30  | 54  | H12-C13-N4-O1       | 30  | 32  |
| H12-C14-O4          | 30  | 22  | H12-C14-N2-O1       | 29  | 1   | H12-C14-N2-O2       | 30  | 40  |
| H12-C14-N4          | 30  | 15  | H12-C15-O3          | 30  | 8   | H12-C15-N2-O1       | 30  | 3   |
| H13-N3-Cu34         | 50  | 22  | H13-N4-Cu33         | 50  | 1   | H13-C3-N1-O3-Cu36   | 56  | 605 |
| H13-C3-N1-O3-Cu41   | 61  | 1   | H13-C3-N1-O3-Cu42   | 62  | 10  | H13-C3-N1-O3-Cu43   | 63  | 6   |
| H13-C3-N1-O3-Cu44   | 64  | 1   | H13-C3-N1-O3-Cu45   | 65  | 1   | H13-C3-N1-O3-Cu46   | 66  | 1   |
| H13-C3-N1-O3-Cu48   | 68  | 145 | H13-C5-N1-Cu60      | 79  | 1   | H13-C5-N1-Cu64      | 83  | 12  |
| H13-C5-N1-Cu80      | 99  | 2   | H13-C5-N1-Cu96      | 115 | 15  | H13-C5-N1-Cu120     | 139 | 1   |
| H13-C5-N1-O3        | 22  | 4   | H13-C5-N3-O2        | 23  | 5   | H13-C6-N1           | 20  | 1   |
| H13-C6-N1-O2        | 22  | 56  | H13-C6-N1-O2-Cu36   | 58  | 1   | H13-C6-N1-O2-Cu48   | 70  | 32  |
| H13-C6-N1-O2-Cu54   | 76  | 40  | H13-C6-N1-O2-Cu64   | 86  | 39  | H13-C6-N1-O2-Cu72   | 94  | 19  |
| H13-C6-N1-O2-Cu96   | 118 | 29  | H13-C6-N1-O2-Cu144  | 166 | 39  | H13-C6-N1-O2-Cu162  | 184 | 6   |
| H13-C6-N1-O3        | 23  | 4   | H13-C6-N2-O2-Cu48   | 71  | 6   | H13-C6-N2-O2-Cu54   | 77  | 102 |
| H13-C6-N2-O2-Cu60   | 83  | 23  | H13-C6-N2-O2-Cu64   | 87  | 12  | H13-C6-N2-O2-Cu72   | 95  | 81  |
| H13-C6-N2-O2-Cu80   | 103 | 3   | H13-C6-N2-O2-Cu81   | 104 | 1   | H13-C6-N2-O2-Cu96   | 119 | 18  |
| H13-C6-N2-O2-Cu108  | 131 | 10  | H13-C6-N2-O2-Cu120  | 143 | 1   | H13-C6-N2-O2-Cu144  | 167 | 10  |
| H13-C6-N2-O2-Cu162  | 185 | 4   | H13-C6-N4-O2-Cu48   | 73  | 1   | H13-C6-N4-O2-Cu54   | 79  | 76  |
| H13-C6-N4-O2-Cu60   | 85  | 40  | H13-C6-N4-O2-Cu64   | 89  | 60  | H13-C6-N4-O2-Cu72   | 97  | 152 |
| H13-C6-N4-O2-Cu80   | 105 | 9   | H13-C6-N4-O2-Cu81   | 106 | 136 | H13-C6-N4-O2-Cu96   | 121 | 26  |
| H13-C6-N4-O2-Cu108  | 133 | 1   | H13-C6-N4-O2-Cu120  | 145 | 33  | H13-C6-N4-O2-Cu144  | 169 | 9   |
| H13-C6-N4-O2-Cu162  | 187 | 1   | H13-C7-N1           | 21  | 1   | H13-C7-N1-O2        | 23  | 16  |
| H13-C7-N3-O3        | 26  | 1   | H13-C7-N3-O4        | 27  | 2   | H13-C7-N5-O3        | 28  | 5   |
| H13-C7-N7-O4        | 31  | 11  | H13-C8-N1           | 22  | 8   | H13-C8-N1-O1        | 23  | 3   |
| H13-C8-N1-O2        | 24  | 1   | H13-C8-N1-O3        | 25  | 5   | H13-C8-N3-O4        | 28  | 3   |
| H13-C8-N3-O5        | 29  | 1   | H13-C8-N5-O2        | 28  | 1   | H13-C8-N5-O4        | 30  | 1   |
| H13-C8-N5-O5        | 31  | 37  | H13-C8-N7-O2        | 30  | 3   | H13-C8-N7-O3        | 31  | 13  |
| H13-C9-N1           | 23  | 1   | H13-C9-N1-O3        | 26  | 38  | H13-C9-N3-O4        | 29  | 8   |
| H13-C9-N3-O5        | 30  | 9   | H13-C9-N3-O6        | 31  | 27  | H13-C9-N5-O3        | 30  | 8   |
| H13-C9-N5-O4        | 31  | 129 | H13-C9-N7-O2        | 31  | 9   | H13-C10-N1-O1       | 25  | 1   |
| H13-C10-N1-O3       | 27  | 2   | H13-C10-N1-O4       | 28  | 9   | H13-C10-N3-O3       | 29  | 1   |
| H13-C10-N3-O4       | 30  | 28  | H13-C10-N3-O5       | 31  | 110 | H13-C10-N5-O2       | 30  | 7   |
| H13-C10-N5-O3       | 31  | 148 | H13-C10-N7-O1       | 31  | 24  | H13-C11-N1          | 25  | 3   |
| H13-C11-N1-O1       | 26  | 6   | H13-C11-N1-O2       | 27  | 1   | H13-C11-N1-O4       | 29  | 1   |
| H13-C11-N1-O5       | 30  | 1   | H13-C11-N1-O6       | 31  | 12  | H13-C11-N3-O2       | 29  | 1   |
| H13-C11-N3-O3       | 30  | 3   | H13-C11-N3-O4       | 31  | 171 | H13-C11-N5-O2       | 31  | 149 |
| H13-C12-N1-O2       | 28  | 7   | H13-C12-N1-O3       | 29  | 8   | H13-C12-N1-O4       | 30  | 9   |
| H13-C12-N1-O5       | 31  | 25  | H13-C12-N3-O2       | 30  | 17  | H13-C12-N3-O3       | 31  | 129 |
| H13-C12-N5          | 30  | 1   | H13-C12-N5-O1       | 31  | 62  | H13-C13-N1-O2       | 29  | 6   |
| H13-C13-N1-O3       | 30  | 6   | H13-C13-N1-O4       | 31  | 38  | H13-C13-N3-O2       | 31  | 92  |
| H13-C13-N5          | 31  | 38  | H13-C14-N1-O3       | 31  | 27  | H13-C14-N3          | 30  | 2   |
| H13-C14-N3-O1       | 31  | 51  | H13-C15-N1          | 29  | 3   | H13-C15-N1-O1       | 30  | 3   |
| H13-C15-N1-O2       | 31  | 13  | H13-C15-N3          | 31  | 1   | H13-C16-N1-O1       | 31  | 15  |

|                    |     |     |                    |     |     |                    |     |     |
|--------------------|-----|-----|--------------------|-----|-----|--------------------|-----|-----|
| H14-O7             | 21  | 99  | H14-N3-Cu35        | 52  | 22  | H14-N3-Cu36        | 53  | 42  |
| H14-N4-Cu33        | 51  | 14  | H14-N4-Cu35        | 53  | 31  | H14-C4-O4          | 22  | 9   |
| H14-C4-N2-Cu64     | 84  | 1   | H14-C4-N2-Cu72     | 92  | 1   | H14-C4-N2-Cu80     | 100 | 1   |
| H14-C4-N2-Cu96     | 116 | 3   | H14-C6-Cu64        | 84  | 1   | H14-C6-Cu96        | 116 | 1   |
| H14-C6-Cu120       | 140 | 1   | H14-C6-N2-O2       | 24  | 35  | H14-C6-N2-O2-Cu48  | 72  | 2   |
| H14-C6-N2-O2-Cu54  | 78  | 10  | H14-C6-N2-O2-Cu60  | 84  | 7   | H14-C6-N2-O2-Cu64  | 88  | 10  |
| H14-C6-N2-O2-Cu72  | 96  | 21  | H14-C6-N2-O2-Cu80  | 104 | 2   | H14-C6-N2-O2-Cu81  | 105 | 6   |
| H14-C6-N2-O2-Cu96  | 120 | 16  | H14-C6-N2-O2-Cu108 | 132 | 4   | H14-C6-N2-O2-Cu120 | 144 | 2   |
| H14-C6-N2-O2-Cu144 | 168 | 14  | H14-C6-N2-O2-Cu162 | 186 | 1   | H14-C6-N2-O4-Cu68  | 94  | 3   |
| H14-C6-N4-O2       | 26  | 37  | H14-C6-N4-O2-Cu48  | 74  | 3   | H14-C6-N4-O2-Cu54  | 80  | 9   |
| H14-C6-N4-O2-Cu60  | 86  | 9   | H14-C6-N4-O2-Cu64  | 90  | 7   | H14-C6-N4-O2-Cu72  | 98  | 14  |
| H14-C6-N4-O2-Cu80  | 106 | 6   | H14-C6-N4-O2-Cu81  | 107 | 4   | H14-C6-N4-O2-Cu96  | 122 | 17  |
| H14-C6-N4-O2-Cu108 | 134 | 7   | H14-C6-N4-O2-Cu120 | 146 | 3   | H14-C6-N4-O2-Cu144 | 170 | 5   |
| H14-C6-N4-O2-Cu162 | 188 | 1   | H14-C7-O3          | 24  | 1   | H14-C7-N2          | 23  | 5   |
| H14-C7-N2-O1       | 24  | 2   | H14-C7-N2-O2       | 25  | 1   | H14-C8             | 22  | 2   |
| H14-C8-O1          | 23  | 1   | H14-C8-O2          | 24  | 4   | H14-C8-O3          | 25  | 1   |
| H14-C8-N2-O3       | 27  | 3   | H14-C8-N2-O4       | 28  | 1   | H14-C8-N4-O5       | 31  | 5   |
| H14-C8-N4-O6       | 32  | 3   | H14-C8-N6-O4       | 32  | 18  | H14-C9             | 23  | 57  |
| H14-C9-N2-O4       | 29  | 1   | H14-C9-N4-O2       | 29  | 2   | H14-C9-N4-O3       | 30  | 2   |
| H14-C9-N4-O4       | 31  | 18  | H14-C9-N4-O5       | 32  | 65  | H14-C9-N6-O2       | 31  | 1   |
| H14-C9-N6-O3       | 32  | 88  | H14-C10-O4         | 28  | 1   | H14-C10-N2-O1      | 27  | 2   |
| H14-C10-N2-O4      | 30  | 3   | H14-C10-N2-O5      | 31  | 4   | H14-C10-N2-O6      | 32  | 16  |
| H14-C10-N4-O3      | 31  | 43  | H14-C10-N4-O4      | 32  | 207 | H14-C10-N6-O2      | 32  | 81  |
| H14-C10-N6-O2-Cu58 | 90  | 2   | H14-C10-N6-O2-Cu70 | 102 | 2   | H14-C11-N2         | 27  | 2   |
| H14-C11-N2-O1      | 28  | 5   | H14-C11-N2-O2      | 29  | 2   | H14-C11-N2-O3      | 30  | 1   |
| H14-C11-N2-O4      | 31  | 8   | H14-C11-N2-O5      | 32  | 63  | H14-C11-N4-O2      | 31  | 30  |
| H14-C11-N4-O3      | 32  | 157 | H14-C11-N6-O1      | 32  | 60  | H14-C12-O6         | 32  | 4   |
| H14-C12-N2         | 28  | 4   | H14-C12-N2-O1      | 29  | 7   | H14-C12-N2-O3      | 31  | 14  |
| H14-C12-N2-O4      | 32  | 86  | H14-C12-N4-O1      | 31  | 10  | H14-C12-N4-O2      | 32  | 188 |
| H14-C12-N6         | 32  | 40  | H14-C13-O5         | 32  | 8   | H14-C13-N2-O1      | 30  | 3   |
| H14-C13-N2-O3      | 32  | 106 | H14-C13-N4         | 31  | 1   | H14-C13-N4-O1      | 32  | 28  |
| H14-C14-O4         | 32  | 4   | H14-C14-N2         | 30  | 4   | H14-C14-N2-O1      | 31  | 1   |
| H14-C14-N2-O2      | 32  | 72  | H14-C14-N4         | 32  | 11  | H14-C15-O3         | 32  | 22  |
| H14-C15-N2-O1      | 32  | 19  | H14-C16-O2         | 32  | 11  | H14-C16-N2         | 32  | 24  |
| H15-C3-N2-O5-Cu32  | 57  | 37  | H15-C3-N2-O5-Cu36  | 61  | 46  | H15-C7-N1-O1       | 24  | 1   |
| H15-C7-N1-O3       | 26  | 2   | H15-C8-N1-O4       | 28  | 1   | H15-C8-N3-O4       | 30  | 1   |
| H15-C8-N3-O5       | 31  | 2   | H15-C8-N5-O3       | 31  | 2   | H15-C8-N5-O4       | 32  | 1   |
| H15-C8-N5-O5       | 33  | 23  | H15-C8-N7-O3       | 33  | 1   | H15-C9-N1          | 25  | 3   |
| H15-C9-N1-O1       | 26  | 6   | H15-C9-N1-O3       | 28  | 3   | H15-C9-N3-O4       | 31  | 1   |
| H15-C9-N3-O5       | 32  | 8   | H15-C9-N3-O6       | 33  | 10  | H15-C9-N5-O3       | 32  | 7   |
| H15-C9-N5-O4       | 33  | 70  | H15-C9-N7-O2       | 33  | 4   | H15-C10-N1         | 26  | 16  |
| H15-C10-N1-O1      | 27  | 1   | H15-C10-N1-O2      | 28  | 2   | H15-C10-N1-O4      | 30  | 2   |
| H15-C10-N3-O3      | 31  | 2   | H15-C10-N3-O4      | 32  | 19  | H15-C10-N3-O5      | 33  | 76  |
| H15-C10-N5-O2      | 32  | 8   | H15-C10-N5-O3      | 33  | 100 | H15-C11-N1-O4      | 31  | 2   |
| H15-C11-N1-O5      | 32  | 1   | H15-C11-N1-O6      | 33  | 2   | H15-C11-N3-O3      | 32  | 12  |
| H15-C11-N3-O4      | 33  | 136 | H15-C11-N5-O1      | 32  | 11  | H15-C11-N5-O2      | 33  | 103 |
| H15-C12-N1-O1      | 29  | 2   | H15-C12-N1-O5      | 33  | 36  | H15-C12-N3-O2      | 32  | 12  |
| H15-C12-N3-O3      | 33  | 140 | H15-C12-N5-O1      | 33  | 19  | H15-C13-N1-O1      | 30  | 1   |
| H15-C13-N1-O3      | 32  | 6   | H15-C13-N1-O4      | 33  | 52  | H15-C13-N3-O1      | 32  | 3   |
| H15-C13-N3-O2      | 33  | 103 | H15-C13-N5         | 33  | 27  | H15-C14-N1-O2      | 32  | 9   |
| H15-C14-N1-O3      | 33  | 45  | H15-C14-N3-O1      | 33  | 71  | H15-C15-N1-O2      | 33  | 27  |
| H15-C15-N3         | 33  | 42  | H15-C16-N1-O1      | 33  | 9   | H16-O8             | 24  | 407 |
| H16-N2-Cu20        | 38  | 13  | H16-N4-Cu20        | 40  | 3   | H16-C4-N8-O4       | 32  | 18  |
| H16-C7-O1          | 24  | 1   | H16-C7-N1          | 24  | 10  | H16-C7-N1-O2       | 26  | 2   |
| H16-C7-N2-O2       | 27  | 7   | H16-C8-O1          | 25  | 39  | H16-C8-O2          | 26  | 5   |
| H16-C8-N4-O6       | 34  | 3   | H16-C8-N6-O4       | 34  | 5   | H16-C9             | 25  | 19  |
| H16-C9-N2          | 27  | 3   | H16-C9-N2-O2       | 29  | 8   | H16-C9-N2-O3       | 30  | 2   |
| H16-C9-N2-O4       | 31  | 1   | H16-C9-N4-O4       | 33  | 7   | H16-C9-N4-O5       | 34  | 35  |
| H16-C9-N6-O3       | 34  | 15  | H16-C10            | 26  | 2   | H16-C10-O1         | 27  | 2   |
| H16-C10-N1-O1      | 28  | 1   | H16-C10-N2-O2      | 30  | 6   | H16-C10-N2-O3      | 31  | 1   |
| H16-C10-N2-O5      | 33  | 3   | H16-C10-N2-O6      | 34  | 4   | H16-C10-N4-O3      | 33  | 11  |

|                |     |    |                   |     |     |                    |     |     |
|----------------|-----|----|-------------------|-----|-----|--------------------|-----|-----|
| H16-C10-N4-O4  | 34  | 95 | H16-C10-N6-O2     | 34  | 30  | H16-C11-N2         | 29  | 2   |
| H16-C11-N2-O3  | 32  | 3  | H16-C11-N2-O4     | 33  | 4   | H16-C11-N2-O5      | 34  | 35  |
| H16-C11-N4-O2  | 33  | 1  | H16-C11-N4-O3     | 34  | 135 | H16-C12-N2         | 30  | 1   |
| H16-C12-N2-O2  | 32  | 1  | H16-C12-N2-O3     | 33  | 9   | H16-C12-N2-O4      | 34  | 87  |
| H16-C12-N4-O1  | 33  | 2  | H16-C12-N4-O2     | 34  | 131 | H16-C13-O5         | 34  | 14  |
| H16-C13-N2-O2  | 33  | 14 | H16-C13-N2-O3     | 34  | 98  | H16-C13-N4-O1      | 34  | 69  |
| H16-C14-O4     | 34  | 22 | H16-C14-N2-O1     | 33  | 6   | H16-C14-N2-O2      | 34  | 53  |
| H16-C14-N4     | 34  | 29 | H16-C15-N2-O1     | 34  | 11  | H16-C16-O2         | 34  | 5   |
| H16-C16-N2     | 34  | 7  | H16-C17-O1        | 34  | 9   | H16-C18            | 34  | 3   |
| H17-C8-N5-O5   | 35  | 5  | H17-C9-N1-O2      | 29  | 5   | H17-C9-N3-O4       | 33  | 2   |
| H17-C9-N3-O5   | 34  | 1  | H17-C9-N3-O6      | 35  | 8   | H17-C9-N5-O4       | 35  | 15  |
| H17-C10-N1-O1  | 29  | 2  | H17-C10-N3-O4     | 34  | 8   | H17-C10-N3-O5      | 35  | 33  |
| H17-C10-N3-O6  | 36  | 1  | H17-C10-N5-O3     | 35  | 15  | H17-C11-N1-O1      | 30  | 4   |
| H17-C11-N1-O5  | 34  | 3  | H17-C11-N1-O6     | 35  | 2   | H17-C11-N3-O3      | 34  | 10  |
| H17-C11-N3-O4  | 35  | 69 | H17-C11-N5-O2     | 35  | 28  | H17-C11-N5-O4      | 37  | 1   |
| H17-C12-N1     | 30  | 4  | H17-C12-N1-O3     | 33  | 1   | H17-C12-N1-O4      | 34  | 6   |
| H17-C12-N1-O5  | 35  | 17 | H17-C12-N3-O2     | 34  | 5   | H17-C12-N3-O3      | 35  | 118 |
| H17-C12-N5-O1  | 35  | 31 | H17-C13-N1-O2     | 33  | 1   | H17-C13-N1-O4      | 35  | 35  |
| H17-C13-N3-O1  | 34  | 3  | H17-C13-N3-O2     | 35  | 68  | H17-C14-N1-O3      | 35  | 32  |
| H17-C14-N3-O1  | 35  | 12 | H17-C15-N1-O2     | 35  | 21  | H17-C15-N3         | 35  | 4   |
| H17-C16-N1-O1  | 35  | 17 | H17-C17-N1        | 35  | 2   | H18-C3-N4-O3-Cu36  | 64  | 604 |
| H18-C6-N2-Cu62 | 88  | 2  | H18-C6-N2-Cu64    | 90  | 1   | H18-C6-N2-Cu66     | 92  | 2   |
| H18-C6-N2-Cu68 | 94  | 4  | H18-C8-N6-O4      | 36  | 1   | H18-C9             | 27  | 1   |
| H18-C9-O5      | 32  | 1  | H18-C9-N2-O2      | 31  | 1   | H18-C9-N4-O5       | 36  | 12  |
| H18-C10        | 28  | 3  | H18-C10-N2-O3     | 33  | 1   | H18-C10-N2-O5      | 35  | 1   |
| H18-C10-N2-O6  | 36  | 10 | H18-C10-N4-O4     | 36  | 41  | H18-C10-N4-O5      | 37  | 1   |
| H18-C11-N2-O3  | 34  | 1  | H18-C11-N2-O4     | 35  | 3   | H18-C11-N2-O5      | 36  | 29  |
| H18-C11-N4-O2  | 35  | 7  | H18-C11-N4-O3     | 36  | 46  | H18-C11-N4-O5      | 38  | 1   |
| H18-C12-N2-O3  | 35  | 3  | H18-C12-N2-O4     | 36  | 70  | H18-C12-N2-O4-Cu68 | 104 | 1   |
| H18-C12-N4-O2  | 36  | 6  | H18-C12-N6-O5     | 41  | 1   | H18-C13-O5         | 36  | 3   |
| H18-C13-N2-O2  | 35  | 1  | H18-C13-N2-O3     | 36  | 38  | H18-C13-N4-O1      | 36  | 4   |
| H18-C14-O4     | 36  | 13 | H18-C14-N2-O2     | 36  | 48  | H18-C14-N6-O1      | 39  | 10  |
| H18-C15-O3     | 36  | 24 | H18-C15-N2-O1     | 36  | 16  | H18-C16-O2         | 36  | 5   |
| H18-C16-N2     | 36  | 1  | H19-C3-N5-O3-Cu36 | 66  | 206 | H19-C7-N1-O1       | 28  | 5   |
| H19-C10-N3-O5  | 37  | 4  | H19-C10-N5-O3     | 37  | 3   | H19-C11-N1-O6      | 37  | 4   |
| H19-C11-N3-O4  | 37  | 23 | H19-C11-N3-O5     | 38  | 3   | H19-C11-N3-O7      | 40  | 1   |
| H19-C12-N1-O3  | 35  | 1  | H19-C12-N1-O4     | 36  | 2   | H19-C12-N1-O5      | 37  | 29  |
| H19-C12-N3-O3  | 37  | 28 | H19-C13-N1-O4     | 37  | 12  | H19-C13-N3-O2      | 37  | 30  |
| H19-C13-N5-O5  | 42  | 1  | H19-C14-N1-O3     | 37  | 9   | H19-C14-N3-O1      | 37  | 21  |
| H19-C14-N3-O5  | 41  | 1  | H19-C14-N7-O4     | 44  | 1   | H19-C15-N1-O2      | 37  | 7   |
| H19-C16-N1-O1  | 37  | 2  | H19-C18-N1-O2     | 40  | 5   | H20-N14-Cu64       | 98  | 2   |
| H20-N14-Cu66   | 100 | 9  | H20-C11-N2-O4     | 37  | 1   | H20-C11-N2-O5      | 38  | 3   |
| H20-C11-N4-O6  | 41  | 3  | H20-C12-N2-O3     | 37  | 2   | H20-C12-N2-O4      | 38  | 17  |
| H20-C12-N4-O2  | 38  | 2  | H20-C12-N4-O6     | 42  | 1   | H20-C12-N6-O7      | 45  | 1   |
| H20-C13-O5     | 38  | 1  | H20-C13-N2-O3     | 38  | 5   | H20-C13-N4-O1      | 38  | 3   |
| H20-C13-N6-O5  | 44  | 2  | H20-C14-O4        | 38  | 2   | H20-C14-N2-O2      | 38  | 25  |
| H20-C15-O3     | 38  | 5  | H20-C15-N4-O5     | 44  | 1   | H20-C16-O2         | 38  | 19  |
| H20-C16-N2     | 38  | 4  | H20-C16-N4-O4     | 44  | 1   | H21-N1-Cu45        | 67  | 1   |
| H21-C11-N1-O5  | 38  | 1  | H21-C11-N3-O4     | 39  | 4   | H21-C12-N1-O5      | 39  | 6   |
| H21-C12-N3-O4  | 40  | 1  | H21-C12-N3-O7     | 43  | 1   | H21-C12-N5-O6      | 44  | 1   |
| H21-C13-N1-O4  | 39  | 10 | H21-C13-N3-O2     | 39  | 2   | H21-C13-N5-O5      | 44  | 1   |
| H21-C13-N5-O7  | 46  | 1  | H21-C13-N5-O8     | 47  | 1   | H21-C14-N1-O2      | 38  | 3   |
| H21-C14-N1-O3  | 39  | 3  | H21-C14-N3-O1     | 39  | 6   | H21-C14-N5-O7      | 47  | 1   |
| H21-C15-N1-O2  | 39  | 6  | H21-C15-N3        | 39  | 15  | H21-C15-N3-O5      | 44  | 2   |
| H21-C15-N3-O6  | 45  | 1  | H21-C15-N5-O7     | 48  | 1   | H21-C15-N7-O4      | 47  | 1   |
| H21-C16-N1-O1  | 39  | 6  | H21-C16-N3-O6     | 46  | 1   | H21-C17-N5-O5      | 48  | 2   |
| H22-N4-Cu48    | 74  | 1  | H22-C10-N2-Cu70   | 104 | 1   | H22-C12-N2-O4      | 40  | 1   |
| H22-C12-N4-O5  | 43  | 1  | H22-C12-N4-O6     | 44  | 3   | H22-C13-N2-O3      | 40  | 15  |
| H22-C13-N4-O5  | 44  | 1  | H22-C13-N4-O6     | 45  | 1   | H22-C14-O4         | 40  | 3   |
| H22-C14-N2-O1  | 39  | 6  | H22-C14-N2-O2     | 40  | 4   | H22-C14-N4-O5      | 45  | 1   |
| H22-C14-N4-O8  | 48  | 1  | H22-C14-N6-O5     | 47  | 1   | H22-C14-N6-O6      | 48  | 1   |

|                   |     |      |                   |     |    |                   |     |    |
|-------------------|-----|------|-------------------|-----|----|-------------------|-----|----|
| H22-C15-N6-O6     | 49  | 2    | H22-C15-N6-O7     | 50  | 1  | H22-C16-N2        | 40  | 3  |
| H22-C16-N4-O5     | 47  | 2    | H22-C16-N4-O6     | 48  | 2  | H22-C16-N4-O7     | 49  | 1  |
| H22-C17-O1        | 40  | 6    | H22-C17-N4-O5     | 48  | 1  | H22-C17-N4-O6     | 49  | 1  |
| H22-C18           | 40  | 9    | H23-N1-Cu44       | 68  | 3  | H23-N2-Cu43       | 68  | 8  |
| H23-C12-N3-O4     | 42  | 1    | H23-C12-N3-O5     | 43  | 4  | H23-C12-N3-O6     | 44  | 1  |
| H23-C13-N3-O2     | 41  | 3    | H23-C13-N3-O5     | 44  | 1  | H23-C13-N3-O7     | 46  | 2  |
| H23-C13-N5-O6     | 47  | 1    | H23-C13-N5-O7     | 48  | 2  | H23-C14-N1-O3     | 41  | 4  |
| H23-C14-N5-O4     | 46  | 3    | H23-C14-N5-O5     | 47  | 1  | H23-C14-N5-O6     | 48  | 1  |
| H23-C15-N1-O2     | 41  | 19   | H23-C15-N5-O5     | 48  | 2  | H23-C15-N5-O6     | 49  | 1  |
| H23-C15-N5-O7     | 50  | 1    | H23-C16-N1-O1     | 41  | 8  | H23-C16-N3-O4     | 46  | 1  |
| H23-C16-N3-O6     | 48  | 1    | H23-C16-N5-O6     | 50  | 1  | H23-C17-N1        | 41  | 2  |
| H23-C17-N3-O5     | 48  | 1    | H23-C17-N3-O6     | 49  | 2  | H23-C17-N3-O7     | 50  | 1  |
| H23-C18-N5-O5     | 51  | 1    | H23-C18-N5-O6     | 52  | 1  | H23-C19-N5-O6     | 53  | 1  |
| H24-N2-Cu20       | 46  | 8    | H24-C12-O12       | 48  | 1  | H24-C12-N4-O4     | 44  | 1  |
| H24-C13-N4-O6     | 47  | 1    | H24-C13-N6-O6     | 49  | 4  | H24-C14-N4-O6     | 48  | 1  |
| H24-C14-N4-O7     | 49  | 1    | H24-C15-N2-O1     | 42  | 4  | H24-C15-N6-O5     | 50  | 1  |
| H24-C15-N6-O6     | 51  | 1    | H24-C16-O2        | 42  | 6  | H24-C17-N4-O6     | 51  | 1  |
| H24-C18-N4-O4     | 50  | 1    | H24-C18-N4-O6     | 52  | 1  | H24-C19-N4-O5     | 52  | 1  |
| H24-C19-N4-O7     | 54  | 1    | H24-C21-N6-O6     | 57  | 1  | H25-C13-N3-O4     | 45  | 1  |
| H25-C14-N3-O5     | 47  | 1    | H25-C14-N5-O6     | 50  | 1  | H25-C14-N5-O7     | 51  | 1  |
| H25-C15-N3-O5     | 48  | 1    | H25-C15-N5-O5     | 50  | 1  | H25-C17-N5-O4     | 51  | 1  |
| H25-C18-N1-O1     | 45  | 20   | H25-C18-N5-O6     | 54  | 1  | H25-C18-N5-O7     | 55  | 1  |
| H25-C19-N5-O5     | 54  | 1    | H25-C19-N5-O6     | 55  | 1  | H25-C20-N5-O5     | 55  | 2  |
| H25-C20-N5-O6     | 56  | 1    | H25-C21-N3-O5     | 54  | 1  | H25-C21-N7-O5     | 58  | 1  |
| H26-N1-Cu45       | 72  | 4    | H26-C6-N2-O6-Cu56 | 96  | 3  | H26-C6-N2-O6-Cu58 | 98  | 1  |
| H26-C6-N2-O6-Cu60 | 100 | 2    | H26-C6-N2-O6-Cu62 | 102 | 1  | H26-C6-N2-O6-Cu64 | 104 | 5  |
| H26-C6-N2-O6-Cu66 | 106 | 2    | H26-C6-N2-O6-Cu68 | 108 | 4  | H26-C6-N2-O6-Cu70 | 110 | 1  |
| H26-C6-N2-O6-Cu72 | 112 | 36   | H26-C6-N2-O6-Cu80 | 120 | 6  | H26-C14-N4-O5     | 49  | 1  |
| H26-C14-N4-O6     | 50  | 3    | H26-C14-N6-O7     | 53  | 1  | H26-C15-N4-O5     | 50  | 1  |
| H26-C15-N4-O6     | 51  | 2    | H26-C15-N4-O7     | 52  | 1  | H26-C16-N6-O5     | 53  | 2  |
| H26-C16-N6-O6     | 54  | 1    | H26-C18-N4-O5     | 53  | 1  | H26-C18-N4-O6     | 54  | 1  |
| H26-C18-N4-O7     | 55  | 1    | H26-C19-N4-O4     | 53  | 1  | H26-C19-N4-O5     | 54  | 1  |
| H26-C20-N4-O5     | 55  | 1    | H26-C20-N6-O5     | 57  | 1  | H26-C20-N6-O6     | 58  | 2  |
| H26-C21-N6-O5     | 58  | 2    | H26-C23-N8-O4     | 61  | 2  | H27-N2-Cu36       | 65  | 6  |
| H27-N7-Cu40       | 74  | 1    | H27-C14-N3-O4     | 48  | 2  | H27-C15-N3-O4     | 49  | 1  |
| H27-C15-N3-O6     | 51  | 1    | H27-C15-N5-O7     | 54  | 1  | H27-C16-N3-O4     | 50  | 1  |
| H27-C16-N3-O6     | 52  | 1    | H27-C16-N5-O5     | 53  | 4  | H27-C17-N5-O4     | 53  | 1  |
| H27-C17-N5-O6     | 55  | 1    | H27-C18-N3-O5     | 53  | 1  | H27-C18-N3-O6     | 54  | 1  |
| H27-C18-N7-O4     | 56  | 1    | H27-C20-N5-O6     | 58  | 1  | H27-C21-N5-O5     | 58  | 1  |
| H27-C23-N3-O5     | 58  | 3    | H27-C24-N5-O4     | 60  | 1  | H27-C24-N5-O6     | 62  | 1  |
| H28-C15-N4-O5     | 52  | 1    | H28-C15-N6-O6     | 55  | 1  | H28-C16-N4-O6     | 54  | 1  |
| H28-C16-N6-O5     | 55  | 1    | H28-C17-N6-O5     | 56  | 1  | H28-C18-N4-O4     | 54  | 1  |
| H28-C18-N4-O5     | 55  | 1    | H28-C19-N4-O5     | 56  | 2  | H28-C19-N4-O6     | 57  | 2  |
| H28-C19-N6-O6     | 59  | 1    | H28-C20-N4-O5     | 57  | 1  | H28-C21-N4-O6     | 59  | 1  |
| H28-C26-N6-O5     | 65  | 1    | H29-C5-N1-O14     | 49  | 7  | H29-C15-N3-O4     | 51  | 1  |
| H29-C15-N3-O5     | 52  | 1    | H29-C16-N3-O4     | 52  | 1  | H29-C17-N7-O5     | 58  | 1  |
| H29-C19-N3-O5     | 56  | 1    | H29-C20-N3-O5     | 57  | 2  | H29-C20-N3-O6     | 58  | 1  |
| H29-C21-N5-O4     | 59  | 2    | H29-C21-N5-O5     | 60  | 1  | H30-O15           | 45  | 23 |
| H30-N2-Cu32       | 64  | 1    | H30-C16-N4-O5     | 55  | 2  | H30-C16-N4-O6     | 56  | 1  |
| H30-C16-N6-O6     | 58  | 1    | H30-C18-N4-O2     | 54  | 4  | H30-C19-N4-O6     | 59  | 1  |
| H30-C20-N4-O5     | 59  | 1    | H30-C21-N4-O4     | 59  | 1  | H30-C21-N4-O5     | 60  | 2  |
| H30-C21-N6-O5     | 62  | 1    | H30-C22-N4-O4     | 60  | 1  | H30-C23-N6-O4     | 63  | 2  |
| H30-C27-N6-O5     | 68  | 1    | H31-C16-N3-O4     | 54  | 2  | H31-C16-N3-O5     | 55  | 1  |
| H31-C20-N3-O5     | 59  | 1    | H31-C20-N5-O6     | 62  | 1  | H31-C22-N5-O5     | 63  | 1  |
| H31-C24-N3-O6     | 64  | 1    | H32-N8-Cu140      | 180 | 7  | H32-C17-N4-O5     | 58  | 2  |
| H32-C17-N6-O6     | 61  | 2    | H32-C18-N6-O4     | 60  | 1  | H32-C26-N4-O5     | 67  | 2  |
| H33-C3-N5-O7-Cu36 | 84  | 1159 | H33-C17-N3-O4     | 57  | 1  | H33-C17-N5-O5     | 60  | 1  |
| H33-C21-N3-O5     | 62  | 2    | H36-N12-Cu144     | 192 | 10 | H40-N28-Cu128     | 196 | 3  |
| H40-N28-Cu132     | 200 | 6    | H48-O24-Cu24      | 96  | 47 | H52-N12-Cu136     | 200 | 5  |
| H52-N16-Cu132     | 200 | 15   | H54-C2-O26-Cu22   | 104 | 77 | H55-C1-O26-Cu22   | 104 | 72 |
| H56-C1-O25-Cu22   | 104 | 74   | H56-C1-O26-Cu22   | 105 | 74 | H57-C1-O26-Cu22   | 106 | 74 |



|                 |     |     |                 |     |     |                 |     |     |
|-----------------|-----|-----|-----------------|-----|-----|-----------------|-----|-----|
| H94-O42-Cu64    | 200 | 58  | H95-C1-O44-Cu63 | 203 | 95  | H95-C1-O44-Cu64 | 204 | 113 |
| H95-C1-O45-Cu62 | 203 | 116 | H95-C1-O45-Cu63 | 204 | 126 | H95-C1-O45-Cu64 | 205 | 102 |
| H95-C2-O46-Cu62 | 205 | 81  | H96-O43-Cu64    | 203 | 88  | H96-C1-O45-Cu60 | 202 | 79  |
| H96-C1-O45-Cu62 | 204 | 91  | H96-C2-O45-Cu62 | 205 | 90  | H96-C2-O46-Cu61 | 205 | 98  |

---

## Reference

- 1 S. Huang, C. Shang, P. Kang, X. Zhang and Z. Liu, *WIREs Comput. Mol. Sci.*, , DOI:10.1002/wcms.1415.
- 2 J. Behler and M. Parrinello, *Phys. Rev. Lett.*, 2007, **98**, 146401.
- 3 J. Behler, *Chem. Rev.*, 2021, **121**, 10037–10072.
- 4 S.-D. Huang, C. Shang, X.-J. Zhang and Z.-P. Liu, *Chem. Sci.*, 2017, **8**, 6327–6337.
- 5 S.-D. Huang, C. Shang, P.-L. Kang and Z.-P. Liu, *Chem. Sci.*, 2018, **9**, 8644–8655.
- 6 P.-L. Kang, Z.-X. Yang, C. Shang and Z.-P. Liu, *J. Chem. Theory Comput.*, 2023, **19**, 7972–7981.
- 7 G. Kresse and J. Hafner, *Phys. Rev. B*, 1993, **47**, 558–561.
- 8 G. Kresse and J. Furthmüller, *Comput. Mater. Sci.*, 1996, **6**, 15–50.
- 9 G. Kresse and J. Furthmüller, *Phys. Rev. B*, 1996, **54**, 11169–11186.
- 10 D. C. Liu and J. Nocedal, *Math. Program.*, 1989, **45**, 503–528.
- 11 C. Shang and Z.-P. Liu, *J. Chem. Theory Comput.*, 2013, **9**, 1838–1845.
- 12 C. Shang, X.-J. Zhang and Z.-P. Liu, *Phys. Chem. Chem. Phys.*, 2014, **16**, 17845–17856.
- 13 C. Shang and Z.-P. Liu, *J. Chem. Theory Comput.*, 2012, **8**, 2215–2222.
- 14 C. Shang and Z.-P. Liu, *J. Chem. Theory Comput.*, 2010, **6**, 1136–1144.
- 15 G. Kresse and D. Joubert, *Phys. Rev. B*, 1999, **59**, 1758–1775.
- 16 J. P. Perdew, K. Burke and M. Ernzerhof, *Phys. Rev. Lett.*, 1996, **77**, 3865–3868.
- 17 S. Grimme, S. Ehrlich and L. Goerigk, *J. Comput. Chem.*, 2011, **32**, 1456–1465.
- 18 S. Grimme, J. Antony, S. Ehrlich and H. Krieg, *J. Chem. Phys.*, 2010, **132**, 154104.
- 19 F. Studt, F. Abild-Pedersen, J. B. Varley and J. K. Nørskov, *Catal. Lett.*, 2013, **143**, 71–73.
- 20 J. Wellendorff, K. T. Lundgaard, A. Møgelhøj, V. Petzold, D. D. Landis, J. K. Nørskov, T. Bligaard and K. W. Jacobsen, *Phys. Rev. B*, 2012, **85**, 235149.
